# Supplementary material for: Relating knowledge, attitude and practice of antibiotic use to extended-spectrum beta-lactamase-producing Enterobacteriaceae carriage: results of a cross-sectional community survey
Source: PubMed Central journal article supplement — BMJ Open. 2019 Mar 5;9(3):e023859. doi: 10.1136/bmjopen-2018-023859 (PMC6429736; doi:10.1136/bmjopen-2018-023859), 2019-03-05
Supplement: bmjopen-2018-023859.draft_revisions.pdf [file bmjopen-2018-023859.draft_revisions.pdf]

# BMJ Open

BMJ Open is committed to open peer review. As part of this commitment we make the peer review history of every article we publish publicly available.

When an article is published we post the peer reviewers' comments and the authors' responses online. We also post the versions of the paper that were used during peer review. These are the versions that the peer review comments apply to.

The versions of the paper that follow are the versions that were submitted during the peer review process. They are not the versions of record or the final published versions. They should not be cited or distributed as the published version of this manuscript.

BMJ Open is an open access journal and the full, final, typeset and author-corrected version of record of the manuscript is available on our site with no access controls, subscription charges or pay-per-view fees (<http://bmjopen.bmj.com>).

If you have any questions on BMJ Open's open peer review process please email [info.bmjopen@bmj.com](mailto:info.bmjopen@bmj.com)

# BMJ Open

## Finishing the prescribed course of antibiotics is associated with Extended Spectrum Beta-Lactamase producing Enterobacteriaceae carriage – results of a Singapore Community Survey

|                               |                                                                                                                                                                                                                                                                                                                                                                                                                                                                                                                                                                                                                                                                                                                                                                                                                                                                                                                                                       |
|-------------------------------|-------------------------------------------------------------------------------------------------------------------------------------------------------------------------------------------------------------------------------------------------------------------------------------------------------------------------------------------------------------------------------------------------------------------------------------------------------------------------------------------------------------------------------------------------------------------------------------------------------------------------------------------------------------------------------------------------------------------------------------------------------------------------------------------------------------------------------------------------------------------------------------------------------------------------------------------------------|
| Journal:                      | <i>BMJ Open</i>                                                                                                                                                                                                                                                                                                                                                                                                                                                                                                                                                                                                                                                                                                                                                                                                                                                                                                                                       |
| Manuscript ID                 | bmjopen-2018-023859                                                                                                                                                                                                                                                                                                                                                                                                                                                                                                                                                                                                                                                                                                                                                                                                                                                                                                                                   |
| Article Type:                 | Research                                                                                                                                                                                                                                                                                                                                                                                                                                                                                                                                                                                                                                                                                                                                                                                                                                                                                                                                              |
| Date Submitted by the Author: | 02-May-2018                                                                                                                                                                                                                                                                                                                                                                                                                                                                                                                                                                                                                                                                                                                                                                                                                                                                                                                                           |
| Complete List of Authors:     | <p>Mo, Yin; National University Health System, Division of Infectious Diseases, University Medicine Cluster</p> <p>Seah, Ivan; National University Singapore Yong Loo Lin School of Medicine</p> <p>Lye, Pei Shi Priscillia ; National University Singapore Yong Loo Lin School of Medicine</p> <p>Kee, Xiang Lee Jamie ; National University Singapore Yong Loo Lin School of Medicine</p> <p>Wong, Kien Yee Michael; National University Singapore Yong Loo Lin School of Medicine</p> <p>Ko, Kwan Ki Karrie ; Singapore General Hospital, Department of Microbiology</p> <p>Ong, Rick Twee-Hee ; National University Singapore Saw Swee Hock School of Public Health</p> <p>Tambyah, Paul; National University Health System, Division of Infectious Diseases, University Medicine Cluster; National University of Singapore, Department of Medicine</p> <p>Cook, Alex R ; National University Singapore Saw Swee Hock School of Public Health</p> |
| Keywords:                     | Extended-spectrum beta-lactamase producing Enterobacteriaceae, Antimicrobial resistance, Duration of antibiotic treatment                                                                                                                                                                                                                                                                                                                                                                                                                                                                                                                                                                                                                                                                                                                                                                                                                             |
|                               |                                                                                                                                                                                                                                                                                                                                                                                                                                                                                                                                                                                                                                                                                                                                                                                                                                                                                                                                                       |

SCHOLARONE™  
Manuscripts

1  
2  
3 Finishing the prescribed course of antibiotics is associated with Extended Spectrum  
4 Beta-Lactamase producing *Enterobacteriaceae* carriage – results of a Singapore  
5 Community Survey  
6  
7  
8  
9  
10  
11  
12

13 Yin MO<sup>1\*</sup>, Ivan SEAH<sup>2\*</sup>, Pei Shi Priscillia LYE<sup>2</sup>, Xiang Lee Jamie KEE<sup>2</sup>, Kien Yee  
14 Michael WONG<sup>2</sup>, Kwan Ki Karrie KO<sup>3</sup>, Rick Twee-Hee ONG<sup>4</sup>, Paul Anantharajah  
15 TAMBYAH<sup>1,5</sup>, Alex R COOK<sup>4</sup>  
16  
17  
18  
19  
20  
21  
22  
23

24 1. Division of Infectious Disease, University Medicine Cluster, National University  
25 Hospital, 5 Lower Kent Ridge Road Singapore 119074; 2. Yong Loo Lin School of  
26 Medicine, 1E Kent Ridge Road Singapore 119228; 3. Department of Microbiology,  
27 Singapore General Hospital, Outram Road Singapore 169608; 4. Saw Swee Hock  
28 School of Public Health, National University of Singapore, 21 Lower Kent Ridge  
29 Road Singapore 119077; 5. Department of Medicine, National University of  
30 Singapore, 21 Lower Kent Ridge Road Singapore 119077  
31  
32  
33  
34  
35  
36  
37  
38  
39  
40

41 \* Authors contributed to this work equally.  
42  
43  
44  
45

46 Correspondence to: Yin Mo [yin\\_mo@nuhs.edu.sg](mailto:yin_mo@nuhs.edu.sg) +65 67795555  
47  
48  
49

50 Word count: 2736  
51  
52  
53  
54  
55  
56  
57  
58  
59  
60

## ABSTRACT

Objectives: To study the correlation between knowledge, attitude and practices (KAP) of antibiotic consumption with epidemiology and molecular characteristics of ESBL-producing *Enterobacteriaceae* (ESBL-PE) carriage, in order to identify modifiable factors and public health interventions to reduce prevalence of multidrug resistant organism (MDRO) colonisation in the community.

Design: Cross-sectional questionnaire of KAP towards antibiotic use and collection of stool samples or rectal swabs. ESBL-PE isolates obtained underwent whole genome sequencing to identify resistance genes.

Setting: A densely populated community in Singapore

Participants: There were 693 healthy community-dwelling questionnaire respondents. Out of which, 305 provided stool samples or rectal swabs.

Results: The overall knowledge of antibiotic use was poor (mean score 4.6/10, IQR 3.0-6.0). 80 participants (80/305, 26.2%) carried at least one ESBL-PE isolate. The most common ESBL-PE was *E. coli* sequence type 131 carrying CTX-M type beta-lactamases (11/71, 15.5%). Living overseas for more than 1 year (OR 3.3, 95% CI 1.6 to 6.9) but not recent hospitalisation or antibiotic intake was associated with ESBL-PE carriage. Interestingly, higher knowledge scores (OR 2.0, 95%CI 1.03 to 3.9) and having no left over antibiotics (OR 2.4, 95%CI 1.2 to 4.9) were independent factors associated with ESBL-PE carriage in the multivariate logistic regression model.

Conclusions: While the role of trans-border transmission of antimicrobial resistance is well known, we may have to examine the current recommendation that all antibiotics courses have to be completed. Clinical trials to determine the optimum duration of treatment for common infections are critically important.

(246 words)

## ARTICLE SUMMARY

### Strengths and limitations of this study

- Understanding antibiotic consumption behavior of the patients and general public is a research priority in the fight against antimicrobial resistance. Correlation of this behavior with multidrug resistance colonisation at a population level has the potential to influence public health messages and policies but is under-explored.
- Our study found a high prevalence of extended spectrum beta-lactamase producing *Enterobacteriaceae* asymptomatic carriage in a country with strict antibiotic prescription policies, and this is independently associated with not having left over antibiotics.
- To our knowledge, this is the first study that explored antibiotic consumption behavior with the acquisition of MDRO at a community level. This novel approach has the potential to guide clinicians and policy makers in identifying directly actionable interventions for the population.
- The main weakness of our study is that the questionnaire data is self-reported and subjected to recall and interviewer biases. We minimised these errors by designing specific questions that are carefully constructed to maximize accuracy and completeness, and all interviewers were trained to adhere to the question and answer format strictly.
- Given that the minimum effective treatment durations have not been determined for many infections and that a significant proportion of antibiotic prescriptions are inappropriate, the widely accepted message on the necessity to complete antibiotic courses may have to be re-examined.

## INTRODUCTION

Multidrug resistant *Enterobacteriaceae* (MDRE) have been identified as “critical priority” resistant organisms by the World Health Organization (WHO) in 2017, and are associated with a high overall all-cause mortality, transmissibility and burden.[1] Resistance is most commonly mediated via the production of extended-spectrum beta-lactamases (ESBL) and carbapenemases.[2] MDRE infections are difficult to treat with few effective antimicrobials on the horizon.[1] Healthy members of the community are increasingly identified as a reservoir of antimicrobial resistance (AMR), especially in the case of ESBL-producing *Enterobacteriaceae* (ESBL-PE).[3] Asymptomatic carriage of ESBL-PE has been associated with more infections, longer hospitalisations, earlier time to death, and higher hospital costs.[4,5] South East Asian (SEA) countries are known to be a hot spot for AMR.[6] However, the region is heterogeneous with varying healthcare standards and antimicrobial stewardship and utilisation policies (ASP).[7] This study aims to correlate the epidemiological and behavioral risk factors of ESBL-PE carriage in Singapore, a high-income country in SEA, as well as delineate the genetic mechanisms associated with these resistant organisms.

## METHODOLOGY

### Study population

The study was carried out in Clementi Township, a densely populated residential area in the west of Singapore. It comprises 27,142 households with 91,630 residents who are socio-demographically comparable to the general Singapore population in terms of age, gender, ethnicity and housing distribution.[8] From June 2016 to April 2017,

1  
2  
3 we randomly selected 2,200 households in Clementi for home visits. The study team  
4  
5 returned to non-responding households for up to three times on separate days to  
6  
7 maximise the response rate. One representative adult above 21 years old in each  
8  
9 household was invited to participate in this cross-sectional study; all consenting  
10  
11 individuals undertook a questionnaire, while some additionally consented to provide a  
12  
13 rectal swab or stool sample. Ethical approval was obtained from National University  
14  
15 of Singapore Institutional Review Board (Reference number B-16-245).  
16  
17  
18  
19

### 20 **Questionnaire on knowledge, attitudes and practices (KAP) on antibiotic intake** 21 **and health-seeking behaviour**

22  
23  
24 We conducted a questionnaire study to assess the KAP of participants towards  
25  
26 antibiotic use. A 40-item questionnaire was developed after performing a thorough  
27  
28 literature review of comparable studies.[9–14] This was then validated by a pilot  
29  
30 study involving 75 community-dwelling volunteers to ensure fluency and accuracy in  
31  
32 question design and language. A team of thirty-three investigators was trained to  
33  
34 administer the survey face-to-face.  
35  
36  
37  
38  
39

40 The questionnaire comprised four main sections. The first covered socio-demographic  
41  
42 data and recent antibiotic intake. The second was an assessment of antibiotic  
43  
44 consumption practices, in which two hypothetical scenarios of diarrhoea and upper  
45  
46 respiratory tract symptoms were presented, and participants were asked if they would  
47  
48 visit the doctor should they experience these symptoms for less than 1 week, if they  
49  
50 would expect or insist on an antibiotic prescription from the doctor's visit, and if they  
51  
52 would seek a second opinion if antibiotics were not prescribed. The third component  
53  
54 assessed participants' attitudes and trust towards primary care healthcare providers,  
55  
56  
57  
58  
59

1  
2  
3 and was adapted from a validated questionnaire from Hall *et al.*[15] The last  
4  
5 component examined participants' knowledge on AMR. The full questionnaire and  
6  
7 grading system can be found in Table S1.  
8  
9

### 10 11 **Bacterial isolation and antibiotic susceptibility testing**

12  
13 The study team requested fresh stool samples or rectal swabs from all study  
14  
15 participants. The samples of those who consented were collected from the participants  
16  
17 within 24 hours of production and stored centrally at 0-4°C prior to microbiological  
18  
19 processing. All sample processing was carried out in the Singapore General Hospital  
20  
21 Diagnostic Bacteriology Laboratory. Samples were inoculated onto *CHROMagar*<sup>TM</sup>  
22  
23 *ESBL* and *CHROMID*<sup>®</sup> *CARBA SMART* (*bioMerieux*) media to detect cephalosporin-  
24  
25 resistant and carbapenem-resistant Gram-negative bacteria, respectively. After 24  
26  
27 hours of incubation, growing colonies were sub-cultured onto sheep blood agar and  
28  
29 used for subsequent species identification and antibiotic susceptibility testing. Species  
30  
31 identification was done by matrix-assisted laser desorption/ionization-time of flight  
32  
33 mass spectrometry (MALDI-TOF MS) (Bruker) and the Vitek-2 (*bioMerieux*) system.  
34  
35  
36  
37  
38

39  
40 Antibiotic susceptibilities to ampicillin, cefazolin, ceftriaxone, cefoxitin, cefepime,  
41  
42 amoxicillin-clavulanic acid, piperacillin-tazobactam, aztreonam, amikacin,  
43  
44 nitrofurantoin, sulfamethoxazole-trimethoprim, gentamicin, ciprofloxacin, fosfomycin,  
45  
46 ertapenem and meropenem were assessed by the disc diffusion method and  
47  
48 interpreted according to the Clinical Laboratory Standards Institute (CLSI)  
49  
50 criteria.[16] *Enterobacteriaceae* isolates that were not susceptible to third/ fourth  
51  
52 generation cephalosporins were identified as potential ESBL producers, while those  
53  
54 not susceptible to any carbapenem were identified as potential carbapenemase  
55  
56  
57  
58  
59  
60



1  
2  
3 producers. Potential carbapenemase producers were tested phenotypically for  
4 carbapenemase production by modified Hodge test and KPC/MBL and OXA-48  
5 Confirm Kit (ROSCO). All potential carbapenemase producers were also subjected to  
6 the Xpert<sup>®</sup> Carba-R test (Cepheid) targeting KPC, NDM, OXA-48 like, IMP and VIM  
7 carbapenemase gene sequences.  
8  
9  
10  
11  
12

### 13 14 15 16 **Whole genome sequencing of ESBL-producing *Enterobacteriaceae***

17 DNA extraction was performed for all *Enterobacteriaceae* isolates that are potentially  
18 ESBL- or carbapenemase- producers, with sequencing libraries for each isolate  
19 prepared as per manufacturer's recommendation to be multiplexed sequenced on the  
20 Illumina HiSEQ platform generating paired-end sequence reads of 2x150 basepairs,  
21 having a data throughput of 1GB per isolate. De-novo assembly of the Illumina reads  
22 was performed using the SPAdes Genome Assembler.[17] Bacterial species were  
23 identified using Kraken,[18] comparing with phenotypic results. Multi-locus sequence  
24 types (MLSTs) were determined by a customized script utilising BLAST search for  
25 identification of genotypes at each loci.[19] Genotypic prediction of antimicrobial  
26 resistance owing to the existence of specific gene sequences were performed using  
27 SRST2.[20]  
28  
29  
30  
31  
32  
33  
34  
35  
36  
37  
38  
39  
40  
41  
42  
43  
44

### 45 **Statistical Analysis**

46 Univariate descriptive analyses are presented for socio-demographics, ESBL-PE or C-  
47 PE carriage status and presence of specific resistance genes. Dichotomous variables  
48 are expressed in frequencies and percentages, while continuous variables are in means  
49 with standard deviation (SD). Categorical variables are compared with  $\chi^2$  and Fisher's  
50 exact tests and continuous variables with unpaired, 2-tailed t tests or nonparametric  
51  
52  
53  
54  
55  
56  
57  
58  
59  
60

Wilcoxon rank sum tests as appropriate. Linear and logistic regressions are used in multivariate analyses to identify statistically significant factors that influence and determine KAP and ESBL-PE carriage. All tests of significance are performed at  $\alpha=5\%$ . Statistical analysis was carried out using R Version 1.1.383.[21]

### Patient and Public Involvement

A group of 75 community dwellers partnered with us for the design and validation of the study questionnaire, production of informational material to support recruitment, and evaluation of the burden of the sample collection from the patient's perspective.

### RESULTS

Out of the 2200 households the study team visited, 693 (31.5%) agreed to participate, of whom 305 (44.0%) also provided stool samples or rectal swabs (Figure S1). Participant demographics are presented in Table 1. The median age of participants was 53 (IQR 38-66). A slight majority were women (56.7%). The ethnic distribution of the participants was similar to the wider Singapore population, with 513 (74.0%) Chinese, 78 (11.3%) Malay, and 83 (12.0%) Indian. The majority had received at least secondary school education (534, 77.0%), and stayed in public housing apartments (661, 95.4%). The median number of occupants per household was 3 (IQR 2-4) persons. The vast majority reported having previously taken antibiotics (616, 96.4%) and 102 (14.7%) had recently been hospitalised in the past 1 year.

Table 1. Demographics, medical background and antibiotic use of study participants

| Characteristic     |         | N (%)            |
|--------------------|---------|------------------|
|                    |         | Total N=693      |
| Age (median, IQR*) |         | 53.0 (38.0-66.0) |
| Females            |         | 393 (56.7)       |
| Race               | Chinese | 513 (74.0)       |

|                                           |                                |            |
|-------------------------------------------|--------------------------------|------------|
|                                           | Malay                          | 78 (11.3)  |
|                                           | Indian                         | 83 (12.0)  |
|                                           | Other ethnicities              | 19 (2.7)   |
| Education level                           | Graduate                       | 88 (12.7)  |
|                                           | Diploma                        | 251 (36.2) |
|                                           | Secondary                      | 195 (28.1) |
|                                           | Primary                        | 122 (17.6) |
|                                           | No Formal Education            | 37 (5.3)   |
| Housing type                              | 1-, 2 or 3-room public housing | 334 (48.2) |
|                                           | 4 or 5- room public housing    | 327 (47.2) |
|                                           | Private landed property        | 32 (4.6)   |
| Number of occupants in the household      | Overall (median, IQR)          | 3 (2-4)    |
|                                           | ≤ 3 persons                    | 369 (53.2) |
|                                           | 4-5 persons                    | 257 (37.1) |
|                                           | ≥ 6 persons                    | 67 (9.7)   |
| Comorbidities                             | Any chronic illnesses          | 239 (34.5) |
|                                           | Hypertension                   | 105 (15.2) |
|                                           | Hyperlipidemia                 | 76 (11.0)  |
|                                           | Diabetes mellitus              | 67 (9.7)   |
| Recent hospitalisation in the past 1 year |                                | 102 (14.7) |
| Antibiotic consumption                    | Within past 6 months           | 175 (25.3) |
|                                           | More than 6 months ago         | 441 (63.6) |
|                                           | Never taken antibiotics        | 77 (11.1)  |

\*IQR- interquartile range, ^Immunocompromised – Use of chemotherapy, corticosteroids or immunosuppressants in the past 6 months

The survey revealed widespread misinformation about antibiotics, with a mean knowledge score of only 4.6 (IQR 3.0-6.0) out of 10 (Table S2). Although the majority of participants knew that viruses are the most common cause of upper respiratory tract infections, a significant proportion (335/693, 48.3%) believed that antibiotics could be used for viral infections and 385 (385/693, 55.6%) thought that the most common cause of diarrhoea was bacteria. The questionnaire also explored participants' compliance to the traditional view of completing antibiotic courses. The majority (554/693, 79.9%) said they would complete the course of antibiotics prescribed, while 13.7% (95/693) would stop taking antibiotics when they start to feel

1  
2  
3 better, and 6.3% (44/693) preferred to seek the doctor's opinion before stopping the  
4  
5 course. Most participants (564/693, 81.4%) were aware that antibiotics are  
6  
7 prescription-only drugs in Singapore, but were unable to correctly answer questions  
8  
9 related to AMR, with 82.5% (572/693) not knowing what causes AMR, and 63.2%  
10  
11 (438/693) believing AMR was not present in Singapore. The level of education  
12  
13 (p<0.001) and staying in larger housing (p=0.037)—the usual proxy for socio-  
14  
15 economic status in Singapore—were independent factors associated with higher total  
16  
17 knowledge scores. However, higher knowledge scores were not strongly related to  
18  
19 participants' trust in primary care physicians (OR 1.08, 95%CI 0.97-1.20) or the  
20  
21 expectation of an antibiotic prescription for common viral infections (OR 0.98,  
22  
23 95%CI 0.96-1.0).  
24  
25  
26  
27  
28

29 A large majority of the community continued to place trust in their primary care  
30  
31 doctors (Table S3). Most strikingly, 627 participants (627/693, 90.6%) trusted  
32  
33 healthcare professionals as their primary source of medical information, over the  
34  
35 Internet, media and family and friends. There were no significant associations  
36  
37 between demographic factors and attitude scores in contrast to the differences seen in  
38  
39 knowledge scores.  
40  
41  
42  
43

44 In the two scenarios (of having an upper-respiratory tract infection or diarrhoea and  
45  
46 vomiting), although about half of the participants (294/693, 42.4% for cough and  
47  
48 runny nose, 414/693, 59.7% for diarrhoea and vomiting) envisioned visiting the  
49  
50 doctor for common complaints lasting less than 1 week, only 18.5% (average  
51  
52 128/693) expected an antibiotic prescription (Table S4). Were antibiotics not  
53  
54 prescribed during the initial visit, very few (average 39/693, 5.6%) reported they  
55  
56  
57  
58  
59  
60

1  
2  
3 would insist on antibiotic prescription or seek a second opinion. The only independent  
4 factor associated with the expectation of an antibiotic prescription was younger age  
5 (OR 0.98, 95%CI 0.97- 0.99) in multivariate logistic analysis. In dealing with leftover  
6 antibiotics, the majority 68.7% (476/693) declared that they do not have leftovers  
7 antibiotics; others reported keeping them for future use (60/693, 8.7%) or disposing  
8 with solid waste (130/693, 18.8%) or down the drain (8/693, 1.2%). Only 3.3%  
9 (23/693) admitted to having previously shared antibiotics with family members and  
10 5.5% (38/693) to having taken leftover antibiotics from a previous illness.  
11  
12  
13  
14  
15  
16  
17  
18  
19  
20  
21

### 22 **Asymptomatic carriage of ESBL-PE**

23  
24 Three hundred and five participants (305/693, 44.0%) provided rectal swabs or stool  
25 samples for microbiology cultures. Eighty participants (80/693, 26.2%, 95%CI: 21.5-  
26 31.6%) were found to carry at least one ceftriaxone non-susceptible  
27 *Enterobacteriaceae* isolate. One hundred and fifteen isolates were detected on the  
28 ESBL screening media, of which 93 were ceftriaxone resistant or intermediate  
29 *Enterobacteriaceae*. Six bacterial isolates were detected on the CRE screening media,  
30 none of which were confirmed to be carbapenemase-producing *Enterobacteriaceae*.  
31 The factors associated with ESBL-PE carriage from multivariate logistic regression  
32 analysis were residency overseas for more than 1 year (OR 3.3, 95%CI 1.6-6.9), with  
33 the most common location being other parts of Asia, scoring higher than 6 on the  
34 knowledge component in the questionnaire (OR 2.0 95%CI 1.03- 3.9) and having no  
35 left over antibiotics (OR 2.4, 95%CI 1.24-4.9). Interestingly, recent hospitalisation  
36 and reported antibiotic intake were not associated with ESBL-PE carriage (Table 2).  
37  
38  
39  
40  
41  
42  
43  
44  
45  
46  
47  
48  
49  
50  
51  
52  
53  
54  
55  
56  
57  
58  
59  
60

Table 2. Risk factors for carriage of ceftriaxone- resistant *Enterobacteriaceae*

| Factors                                                           |                                    | Total<br>N=305   | Carriers<br>N=80 | Non-carriers<br>N=225 | p-<br>values |
|-------------------------------------------------------------------|------------------------------------|------------------|------------------|-----------------------|--------------|
| Age (median, IQR*)                                                |                                    | 54.0 (41.0-65.0) | 56.0 (38.8-66.0) | 54.0 (41.0-65.0)      | 0.79         |
| Females (%)                                                       |                                    | 169 (55.4)       | 46 (57.5)        | 123 (54.7)            | 0.76         |
| Ethnicity (%)                                                     | Chinese                            | 237 (77.7)       | 67 (83.8)        | 170 (75.6)            | 0.24         |
|                                                                   | Malay                              | 28 (9.2)         | 3 (3.8)          | 25 (11.1)             |              |
|                                                                   | Indian                             | 30 (9.8)         | 7 (8.8)          | 23 (10.2)             |              |
|                                                                   | Others                             | 10 (3.3)         | 3 (3.8)          | 7 (3.1)               |              |
| Education (%)                                                     | No formal education                | 11 (3.6)         | 4 (5.0)          | 7 (3.1)               | 0.45         |
|                                                                   | Primary                            | 57 (18.7)        | 12 (15.0)        | 45 (20.0)             |              |
|                                                                   | Secondary                          | 93 (30.5)        | 21 (26.2)        | 72 (32.0)             |              |
|                                                                   | Tertiary                           | 110 (36.1)       | 31 (38.8)        | 79 (35.1)             |              |
|                                                                   | Graduate                           | 34 (11.1)        | 12 (15.0)        | 22 (9.8)              |              |
| Housing (%)                                                       | HDB 1- and 2-room                  | 23 (7.5)         | 5 (6.2)          | 18 (8.0)              | 0.75         |
|                                                                   | HDB 3-room                         | 115 (37.7)       | 32 (40.0)        | 83 (36.9)             |              |
|                                                                   | HDB 4-room                         | 98 (32.1)        | 24 (30.0)        | 74 (32.9)             |              |
|                                                                   | HDB 5-room and Executive Apartment | 47 (15.4)        | 11 (13.8)        | 36 (16.0)             |              |
|                                                                   | Landed Property                    | 22 (7.2)         | 8 (10.0)         | 14 (6.2)              |              |
| Pets (%)                                                          |                                    | 33 (10.8)        | 7 (8.8)          | 26 (11.6)             | 0.75         |
| Number of occupants in the household (mean, sd)                   |                                    | 3.6 (1.6)        | 3.6 (1.6)        | 3.6 (1.6)             | 0.71         |
| Stayed overseas for >1 year (%)                                   |                                    | 57 (18.7)        | 26 (32.5)        | 31 (13.8)             | <0.001       |
| Stayed in South, East or Southeast Asia for >1 year (%)           |                                    | 40 (13.1)        | 18 (22.5)        | 22 (9.8)              | 0.007        |
| Travelled in the past >1 year (%)                                 |                                    | 178 (58.4)       | 47 (58.8)        | 131 (58.2)            | 1.0          |
| Travelled in South, East or Southeast Asia in the past 1 year (%) |                                    | 163 (53.4)       | 43 (53.8)        | 120 (53.3)            | 1.0          |
| Any chronic illnesses (%)                                         |                                    | 127 (41.6)       | 33 (41.2)        | 94 (41.8)             | 1.0          |
| Hospitalisation in the past 1 year (%)                            |                                    | 43 (14.1)        | 14 (17.5)        | 29 (12.9)             | 0.41         |
| Previous antibiotics intake (%)                                   |                                    | 282 (92.5)       | 76 (95.0)        | 206 (91.6)            | 0.45         |
| Antibiotics in the last 6 months                                  |                                    | 85 (27.9)        | 23 (28.8)        | 62 (27.6)             | 0.61         |

|     |  |  |  |  |
|-----|--|--|--|--|
| (%) |  |  |  |  |
|-----|--|--|--|--|

\*IQR- interquartile range

Out of the 93 ceftriaxone-resistant isolates, 17 were ceftioxin resistant, suggestive of AmpC  $\beta$ -Lactamase production. Only one *Enterobacter cloacae* complex isolate was resistant to ertapenem and was of intermediate susceptibility to meropenem (Table 3). This *Enterobacter cloacae* complex isolate was not a carbapenemase-producer based on phenotypic and genotypic tests. Eighty-three (83/93, 89.2%) of these ESBL-PE isolates were *E. coli*. The majority of ESBL-PE remained susceptible to aminoglycosides including gentamicin (80/93, 86.0%) and amikacin (91/93, 97.8%) as well as nitrofurantoin (76/93, 81.7%), while ciprofloxacin (53/93, 57.0%) and Sulfamethoxazole-trimethoprim (32/93, 34.4%) resistance were more common.

Table 3. Antibiotic susceptibility of the ceftriaxone-resistant isolates

|                               | <i>E coli</i> (N=83)<br>N (%) | <i>Klebsiella</i> (N=6)<br>N (%) | Others^ (N=4)<br>N (%) | Total (N=93)<br>N (%) |
|-------------------------------|-------------------------------|----------------------------------|------------------------|-----------------------|
| Piperacillin-tazobactam       | 73 (88.0)                     | 4 (66.7)                         | 1 (25.0)               | 78 (83.9)             |
| Cefepime                      | 35 (42.4)                     | 3 (50)                           | 2 (50.0)               | 40 (43.0)             |
| Aztreonam                     | 39 (47.0)                     | 2 (33.3)                         | 1 (25.0)               | 42 (45.2)             |
| Amikacin                      | 82 (98.8)                     | 5 (83.3)                         | 4 (100)                | 91 (97.8)             |
| Gentamicin                    | 75 (90.4)                     | 3 (50)                           | 2 (50.0)               | 80 (86.0)             |
| Nitrofurantoin                | 73 (88.0)                     | 2 (33.3)                         | 1 (25.0)               | 76 (81.7)             |
| Sulfamethoxazole-trimethoprim | 32 (38.6)                     | 0 (0)                            | 0 (0)                  | 32 (34.4)             |
| Ciprofloxacin                 | 48 (57.8)                     | 4 (66.7)                         | 1 (25.0)               | 53 (57.0)             |
| Fosfomicin                    | 63 (75.9)                     | 1 (16.7)                         | 0 (0)                  | 64 (68.8)             |
| Ertapenem                     | 83 (100)                      | 6 (100)                          | 3 (75.0)               | 92 (98.9)             |
| Meropenem                     | 83 (100)                      | 6 (100)                          | 3 (75.0)               | 92 (98.9)             |

^ Others include *Enterobacter* spp (2), *Proteus mirabilis* (1), *Raoultella*

*ornithinolytica* (1)

### Molecular classification of ESBL-PE

Eighty (80/93, 85%) ESBL-PE isolates from unique participants underwent whole genome sequencing. When two or more isolates grew from a single subject's sample, *E. coli*, the commonest species observed, was selected to facilitate comparisons. Genotypic species determination from the sequence reads correlated completely with the results by MALDI-TOF MS or the Vitek-2 system. Seventy-one (71/80, 88.8%) isolates were *E. coli*, of which the most common molecular type was sequence type (ST) 131 (11/71, 15.5%) (Table 4). The most frequently observed ESBL gene was CTX-M (62/80, 77.5%), especially CTX-M-15 (21/71, 29.6%) and CTX-M-27 (16/71, 22.5%). More *E coli* ST131 were resistant to fluoroquinolones than non-ST131 isolates (p=0.041). The only significant factor from the questionnaire associated with ESBL-producing *E. coli* ST131 carriage was having more children in the household, but the difference was marginal (mean 0.3±0.7 versus 0.8 ± 1.1, p=0.034).

Table 4. Molecular classification of ceftriaxone-resistant *E coli* isolates

|                                       | <i>E coli</i><br>N=71 (%) |                       | p-value |
|---------------------------------------|---------------------------|-----------------------|---------|
|                                       | ST131<br>N=11 (%)         | Non ST131<br>N=60 (%) |         |
| Number of resistant genes (mean ± sd) | 1.2 ± 0.4                 | 1.9 ± 0.8             | 0.0012  |
| ESBL genes                            |                           |                       |         |
| CTXM                                  | 15                        | 4 (36.4)              | 0.72    |
|                                       | 27                        | 7 (63.6)              |         |
|                                       | 14                        | 0 (0.0)               |         |
|                                       | 55                        | 0 (0.0)               |         |
|                                       | 8                         | 0 (0.0)               |         |
|                                       | Others                    | 0 (0.0)               |         |
|                                       |                           | 9 (15.0)              |         |



|                      |        |            |           |       |
|----------------------|--------|------------|-----------|-------|
|                      | None   | 0 (0.0)    | 3 (5.0)   |       |
| SHV                  | 12     | 0 (0.0)    | 3 (5.0)   | 1.0   |
|                      | None   | 11 (100.0) | 57 (95.0) |       |
| TEM                  | 206    | 1 (9.1)    | 11 (18.3) | 0.11  |
|                      | 198    | 0 (0.0)    | 3 (5.0)   |       |
|                      | Others | 0 (0.0)    | 15 (25.0) |       |
|                      | None   | 10 (90.9)  | 31 (51.7) |       |
| OXA                  |        | 1 (9.1)    | 3 (5.0)   | 1.0   |
| Quinolone resistance |        | 8 (72.7)   | 21 (35.0) | 0.041 |

\* Non-ST131 sequence types are: 38 (N=8), 1193 (N=5), 10 (N=4), 48 (N=3), other (N=35), none (N=5)

## DISCUSSION

We found a significant burden of ESBL-PE carriage (80/305, 26.2%) among healthy community dwellers in Singapore, twice the rate found in an earlier study in 2014 of patients at an emergency department.[22] Similar rises have been observed globally.[3] Although these figures are lower than the reported prevalence of over 40% fecal carriage with ESBL-PE elsewhere in South and South East Asia, they are much higher than the 1.5-3% observed in the US and UK.[3] Singapore has a tightly regulated antibiotic prescription system similar to Europe and the US where only registered medical practitioners are allowed to prescribe antibiotics, and they must be purchased from licensed dispensers. We did not find any association between fecal carriage of ESBL-PE and short-term travel, unlike other studies.[23] Singapore is a city-state and overseas travel is very common, making it hard to detect such a relationship when frequent trips to neighbouring countries are made. However, past residency overseas was strongly associated with colonisation, especially those who lived elsewhere in South or South East Asia (OR 3.3, 95%CI 1.6- 6.9). The possibility of substantial acquisition of MDRO colonisation and infection through overseas

1  
2  
3 exposure[24,25] once again highlights the urgent need for a regional, collaborative  
4  
5 approach to tackling the problem of AMR.  
6  
7

8  
9 Molecular typing of the ESBL-PE isolates from our cohort showed that *E. coli* ST131  
10  
11 with CTX-M beta-lactamases (11/71, 15.5%) were the most common ESBL  
12  
13 mechanism, echoing the global dissemination of this hyperendemic clone, especially  
14  
15 in the community.[26] Similar to reports from communities was 11.1% (32/287) in  
16  
17 China[27] and 4.1% (8/193) in Thailand[28] have been published. The reason for the  
18  
19 rapid worldwide expansion and long-term persistence of *E. coli* ST131 is thought to  
20  
21 be due to compensatory mutations within the core genome counterbalancing the  
22  
23 fitness cost associated with IncF plasmids, thus sustaining its spread even in the  
24  
25 absence of direct antibiotic selection pressure.[29] These *E. coli* ST131 are not just  
26  
27 prevalent colonisers but have also associated with invasive bloodstream infections in  
28  
29 hospitalized patients in Australia, New Zealand and Singapore.[30] It will be  
30  
31 important to better understand the evolutionary ecology and transmission dynamics of  
32  
33 this emerging clone.  
34  
35  
36  
37  
38

39 This study also revealed widespread misconceptions about the utility of antibiotics for  
40  
41 viral infections, consistent with the findings of a global survey conducted by the  
42  
43 WHO in 2015.[31] We also found that, the public continues to place trust in their  
44  
45 primary care doctors and their recommendations. This dependence on physicians is in  
46  
47 contrast to doctors' perceptions of patient expectations for antibiotic  
48  
49 prescriptions.[32] This discordance has been previously described and is thought to be  
50  
51 due to the lack of empowerment of the patient and the erroneous attribution of patient  
52  
53  
54  
55  
56  
57  
58  
59  
60

1  
2  
3 satisfaction to antibiotic prescription rather than a focus on better patient-doctor  
4  
5 communication.[33,34]  
6  
7

8  
9 Engaging and educating both the prescribers and the public may reduce inappropriate  
10 antibiotic use,[35,36] and has been identified as a key strategy by the WHO and the  
11 UK to tackle AMR.[37,38] One of the most striking findings of this study is that  
12  
13 having a higher knowledge score and not having left over antibiotics were  
14  
15 independent risk factors for carriage of ESBL-PE. The current WHO recommendation  
16  
17 remains that full courses of antibiotics should be completed to prevent the onset of  
18  
19 resistance.[31] Similar messages are advocated in national campaigns launched in  
20  
21 Australia,[39] Canada,[40] the United States[41] and Europe.[42] However,  
22  
23 increasing evidence is emerging supporting shorter duration of antibiotics for  
24  
25 common infections.[43] The impact of prolonged antibiotic use on the host flora is  
26  
27 often underestimated.[43] Given that the minimum effective treatment durations have  
28  
29 not been determined for many infections and that a significant proportion of antibiotic  
30  
31 prescriptions are inappropriate, the whole question about “completing the course” of  
32  
33 antibiotics may have to be re-examined.  
34  
35  
36  
37  
38  
39  
40  
41

42 To our knowledge, this is the first study that explored antibiotic consumption  
43  
44 behavior with the acquisition of MDRO at a community level. This novel approach  
45  
46 has the potential to guide clinicians and policy makers in identifying directly  
47  
48 actionable interventions for the population. The main weakness of our study is that  
49  
50 the questionnaire data is self-reported and subjected to recall and interviewer biases.  
51  
52 We minimised these errors by designing specific questions that are carefully  
53  
54  
55  
56  
57  
58  
59  
60

1  
2  
3 constructed to maximize accuracy and completeness, and all interviewers were trained  
4  
5 to adhere to the question and answer format strictly.  
6  
7

## 8 9 **CONCLUSION**

10  
11 There is a significant burden of asymptomatic ESBL-PE colonisation in Singapore,  
12  
13 especially with *E. coli* ST131 carrying CTX-M. Innovative approaches to control  
14  
15 AMR that take into account transboundary transmission of resistance and clinical  
16  
17 trials to determine the appropriate duration of antimicrobial therapy will be critical to  
18  
19 control the emergence of these resistant clones which have contributed significantly to  
20  
21 the current global antibiotic resistance crisis.  
22  
23  
24  
25

## 26 27 **CONTRIBUTOR AND GUARANTOR INFORMATION**

28  
29 YM, PAT, ARC, IS, PSPL, XLJK and KYMW conceptualised and designed the  
30  
31 study. IS, PSPL, XLJK and KYMW conducted the study and collected data. KKKK  
32  
33 performed microbiological testing. RTHO planned and conducted genomic  
34  
35 sequencing and interpreted the results. YM, ARC, IS, PSPL, XLJK and KYMW  
36  
37 performed data analysis. All participated in the writing of the script, and affirm that  
38  
39 the manuscript is an honest, accurate, and transparent account of the study being  
40  
41 reported; that no important aspects of the study have been omitted; and that any  
42  
43 discrepancies from the study as originally planned have been explained. YM and IS  
44  
45 accept full responsibility for the work and/or the conduct of the study, had access to  
46  
47 the data, and controlled the decision to publish. The corresponding author attests that  
48  
49 all listed authors meet authorship criteria and no others meeting the criteria have been  
50  
51 omitted.  
52  
53  
54  
55  
56  
57  
58  
59  
60

## ACKNOWLEDGEMENT

The authors thank the study team members, Ang Chen Xiang, Anne Goei Hui Yi, Charmaine Loh Hui Yun, Cheong Shao Wei Dominic, Chew Shi Jie, Chong Yvette, Choo Hui Min Charlotte, Choo Xin Yi, Daveraj Sivasegaran, Dean Krishen Sethi, Joshua Tan Teck Chin, Keith Ching Wei Jie, Khoo Chun Yuet, Krystal Khoo Oon Hui, Lai Jieru, Liew Yi Song Terence, Lim Li Liang Joshua, Lok Si Ying Andrea, Lynette Sim Pei Shuen, Michelle Sim Yan Lin, Mok Charlene, Ong Yuxuan Daniel, Ong Zheng Xuan, Quek Keng Liang, R Krishnapriya, Sophia Ng Shuen Yii, Tan Fang Min Grace, Tan Jian Wei, Tan Pei Min Mabelleline, Tay Yiling Elaine, Tey Min Li, Wu Yanlin, Zhou Lingyue, for their contributions in carrying out home visits, interviews and sample collections.

## COPYRIGHT/LICENCE FOR PUBLICATION

The Corresponding Author has the right to grant on behalf of all authors and does grant on behalf of all authors, a worldwide licence to the Publishers and its licensees in the perpetuity, in all forms, formats and media (whether known now or created in the future), to i) publish, reproduce, distribute display and store the Contribution, ii) translate the Contribution into other languages, create adaptations, reprints, include within collections and create summaries, extracts and/or, abstracts of the Contribution, iii) create any other derivative work(s) based on the Contribution, iv) to exploit all subsidiary rights in the Contribution, v) the inclusion of electronic links from the Contribution to third party material where-ever it may be located; and, vi) licence any third party to do any or all of the above.

## FUNDING

1  
2  
3 Data collection was supported from funding from the Infectious Diseases Research  
4 Fund, National University of Singapore (NUS), and the Saw Swee Hock School of  
5 Public Health (SSHSPH). RTHO received funding support from the SSHSPH, NUS.  
6  
7  
8  
9 ARC was supported by the Singapore Population Health Improvement Centre.  
10

### 11 **COMPETING INTERESTS DECLARATION**

12  
13 All authors have completed the ICMJE uniform disclosure form at  
14 [www.icmje.org/coi\\_disclosure.pdf](http://www.icmje.org/coi_disclosure.pdf) and declare: no financial relationships with any  
15  
16 organisations that might have an interest in the submitted work in the previous three  
17  
18 years; no other relationships or activities that could appear to have influenced the  
19  
20 submitted work.  
21  
22  
23  
24  
25

### 26 **DATA SHARING**

27  
28 The authors commit to making the relevant anonymised patient level data available on  
29  
30 reasonable request.  
31  
32  
33  
34

### 35 **REFERENCES**

- 36  
37 1 Tacconelli E, Carrara E, Savoldi A, *et al.* Discovery, research, and  
38 development of new antibiotics: the WHO priority list of antibiotic-resistant  
39 bacteria and tuberculosis. *Lancet Infect Dis* 2018;**18**:318–27.  
40  
41 doi:10.1016/S1473-3099(17)30753-3  
42  
43  
44  
45 2 Ruppé É, Woerther P-L, Barbier F. Mechanisms of antimicrobial resistance in  
46 Gram-negative bacilli. *Ann Intensive Care* 2015;**5**:61. doi:10.1186/s13613-015-  
47  
48 0061-0  
49  
50  
51  
52 3 Karanika S, Karantanos T, Arvanitis M, *et al.* Fecal Colonization With  
53 Extended-spectrum Beta-lactamase–Producing *Enterobacteriaceae* and Risk  
54  
55  
56  
57  
58  
59  
60

- 1  
2  
3 Factors Among Healthy Individuals: A Systematic Review and Metaanalysis.  
4  
5 *Clin Infect Dis* 2016;**63**:310–8. doi:10.1093/cid/ciw283  
6
- 7 4 Reddy P, Malczynski M, Obias A, *et al.* Screening for Extended-Spectrum -  
8  
9 Lactamase-Producing Enterobacteriaceae among High-Risk Patients and Rates  
10  
11 of Subsequent Bacteremia. *Clin Infect Dis* 2007;**45**:846–52.  
12  
13 doi:10.1086/521260  
14
- 15 5 Troché G, Toly L-M, Guibert M, *et al.* Detection and Treatment of Antibiotic-  
16  
17 Resistant Bacterial Carriage in a Surgical Intensive Care Unit: A 6-Year  
18  
19 Prospective Survey. *Infect Control Hosp Epidemiol* 2005;**26**:161–5.  
20  
21 doi:10.1086/502521  
22  
23
- 24 6 Coker RJ, Hunter BM, Rudge JW, *et al.* Emerging infectious diseases in  
25  
26 southeast Asia: regional challenges to control. *Lancet* 2011;**377**:599–609.  
27  
28 doi:10.1016/S0140-6736(10)62004-1  
29  
30
- 31 7 Zellweger RM, Carrique-Mas J, Limmathurotsakul D, *et al.* A current  
32  
33 perspective on antimicrobial resistance in Southeast Asia. *J Antimicrob*  
34  
35 *Chemother* 2017;**72**:2963–72. doi:10.1093/jac/dkx260  
36  
37
- 38 8 Singapore Department of Statistics. Singapore Residents by Planning  
39  
40 Area/Subzone, 2015. 2015.
- 41 9 Pan DST, Huang JH, Lee MHM, *et al.* Knowledge, attitudes and practices  
42  
43 towards antibiotic use in upper respiratory tract infections among patients  
44  
45 seeking primary health care in Singapore. *BMC Fam Pract* 2016;**17**:148.  
46  
47 doi:10.1186/s12875-016-0547-3  
48  
49
- 50 10 Scaioli G, Gualano MR, Gili R, *et al.* Antibiotic Use: A Cross-Sectional  
51  
52 Survey Assessing the Knowledge, Attitudes and Practices amongst Students of  
53  
54 a School of Medicine in Italy. *PLoS One* 2015;**10**:e0122476.  
55  
56  
57  
58  
59  
60

- 1  
2  
3 doi:10.1371/journal.pone.0122476  
4  
5 11 Awad AI, Aboud EA. Knowledge, attitude and practice towards antibiotic use  
6 among the public in Kuwait. *PLoS One* 2015;**10**:e0117910.  
7  
8 doi:10.1371/journal.pone.0117910  
9  
10  
11 12 Huang Y, Gu J, Zhang M, *et al.* Knowledge, attitude and practice of  
12 antibiotics: a questionnaire study among 2500 Chinese students. *BMC Med*  
13 *Educ* 2013;**13**:163. doi:10.1186/1472-6920-13-163  
14  
15  
16 13 Lv B, Zhou Z, Xu G, *et al.* Knowledge, attitudes and practices concerning self-  
17 medication with antibiotics among university students in western China. *Trop*  
18 *Med Int Heal* 2014;**19**:769–79. doi:10.1111/tmi.12322  
19  
20  
21 14 Teck KC, Ghazi HF, Bin Ahmad MI, *et al.* Knowledge, Attitude, and Practice  
22 of Parents Regarding Antibiotic Usage in Treating Children’s Upper  
23 Respiratory Tract Infection at Primary Health Clinic in Kuala Lumpur,  
24 Malaysia. *Heal Serv Res Manag Epidemiol* 2016;**3**:233339281664372.  
25  
26 doi:10.1177/2333392816643720  
27  
28  
29 15 Hall MA, Zheng B, Dugan E, *et al.* Measuring Patients’ Trust in their Primary  
30 Care Providers. *Med Care Res Rev* 2002;**59**:293–318.  
31  
32 doi:10.1177/1077558702059003004  
33  
34  
35 16 Performance Standards for Antimicrobial Susceptibility Testing An  
36 informational supplement for global application developed through the Clinical  
37 and Laboratory Standards Institute.  
38  
39 <http://ljzx.cqrmhospital.com/upfiles/201601/20160112155335884.pdf>  
40  
41 (accessed 12 Apr 2018).  
42  
43  
44 17 Bankevich A, Nurk S, Antipov D, *et al.* SPAdes: a new genome assembly  
45 algorithm and its applications to single-cell sequencing. *J Comput Biol*  
46  
47  
48  
49  
50  
51  
52  
53  
54  
55  
56  
57  
58  
59  
60



- 2012;**19**:455–77. doi:10.1089/cmb.2012.0021
- 18 Wood DE, Salzberg SL. Kraken: ultrafast metagenomic sequence classification  
using exact alignments. *Genome Biol* 2014;**15**:R46. doi:10.1186/gb-2014-15-3-  
r46
- 19 Madden T. Chapter 16. The BLAST Sequence Analysis Tool.  
[https://www.ncbi.nlm.nih.gov/books/NBK21097/pdf/Bookshelf\\_NBK21097.pdf](https://www.ncbi.nlm.nih.gov/books/NBK21097/pdf/Bookshelf_NBK21097.pdf)  
(accessed 20 Apr 2018).
- 20 Inouye M, Dashnow H, Raven L-A, *et al.* SRST2: Rapid genomic surveillance  
for public health and hospital microbiology labs. *Genome Med* 2014;**6**:90.  
doi:10.1186/s13073-014-0090-6
- 21 R Core Team. A language and environment for statistical computing. 2017.
- 22 Young BE, Lye DC, Krishnan P, *et al.* A prospective observational study of the  
prevalence and risk factors for colonization by antibiotic resistant bacteria in  
patients at admission to hospital in Singapore. *BMC Infect Dis* 2014;**14**:298.  
doi:10.1186/1471-2334-14-298
- 23 McNulty CAM, Lecky DM, Xu-McCrae L, *et al.* CTX-M ESBL-producing  
Enterobacteriaceae: estimated prevalence in adults in England in 2014. *J*  
*Antimicrob Chemother* Published Online First: 5 March 2018.  
doi:10.1093/jac/dky007
- 24 Tängdén T, Cars O, Melhus A, *et al.* Foreign travel is a major risk factor for  
colonization with *Escherichia coli* producing CTX-M-type extended-spectrum  
beta-lactamases: a prospective study with Swedish volunteers. *Antimicrob*  
*Agents Chemother* 2010;**54**:3564–8. doi:10.1128/AAC.00220-10
- 25 Woerther P-L, Andremont A, Kantele A. Travel-acquired ESBL-producing  
Enterobacteriaceae: impact of colonization at individual and community level.

- 1  
2  
3 *J Travel Med* 2017;**24**:S29–34. doi:10.1093/jtm/taw101
- 4  
5 26 Dautzenberg MJD, Haverkate MR, Bonten MJM, *et al.* Epidemic potential of  
6  
7 Escherichia coli ST131 and Klebsiella pneumoniae ST258: a systematic review  
8  
9 and meta-analysis. *BMJ Open* 2016;**6**:e009971. doi:10.1136/bmjopen-2015-  
10  
11 009971
- 12  
13 27 Zhong Y-M, Liu W-E, Liang X-H, *et al.* Emergence and spread of O16-ST131  
14  
15 and O25b-ST131 clones among faecal CTX-M-producing Escherichia coli in  
16  
17 healthy individuals in Hunan Province, China. *J Antimicrob Chemother*  
18  
19 2015;**70**:2223–7. doi:10.1093/jac/dkv114
- 20  
21  
22 28 Niumsup PR, Tansawai U, Na-udom A, *et al.* Prevalence and risk factors for  
23  
24 intestinal carriage of CTX-M-type ESBLs in Enterobacteriaceae from a Thai  
25  
26 community. *Eur J Clin Microbiol Infect Dis* 2018;**37**:69–75.  
27  
28 doi:10.1007/s10096-017-3102-9
- 29  
30  
31 29 Pitout JDD, DeVinney R. Escherichia coli ST131: a multidrug-resistant clone  
32  
33 primed for global domination. *F1000Research* 2017;**6**.  
34  
35 doi:10.12688/f1000research.10609.1
- 36  
37  
38 30 Harris PNA, Ben Zakour NL, Roberts LW, *et al.* Whole genome analysis of  
39  
40 cephalosporin-resistant Escherichia coli from bloodstream infections in  
41  
42 Australia, New Zealand and Singapore: high prevalence of CMY-2 producers  
43  
44 and ST131 carrying blaCTX-M-15 and blaCTX-M-27. *J Antimicrob*  
45  
46 *Chemother* 2018;**73**:634–42. doi:10.1093/jac/dkx466
- 47  
48 31 Antibiotic resistance: Multi-country public awareness survey. World Health  
49  
50 Organization.  
51  
52 2016.<http://www.who.int/drugresistance/documents/baselinesurvey-nov2015/en>  
53  
54 / (accessed 25 Mar 2018).
- 55  
56  
57  
58  
59  
60

- 1  
2  
3 32 Lee T-H, Wong JG, Lye DC, *et al.* Medical and psychosocial factors associated  
4 with antibiotic prescribing in primary care: survey questionnaire and factor  
5 analysis. *Br J Gen Pract* 2017;**67**:e168–77. doi:10.3399/bjgp17X688885  
6  
7  
8  
9 33 Welschen I, Kuyvenhoven M, Hoes A, *et al.* Antibiotics for acute respiratory  
10 tract symptoms: patients' expectations, GPs' management and patient  
11 satisfaction. *Fam Pract*;21. doi:10.1093/fampra/cmh303  
12  
13  
14  
15 34 Davey P, Pagliari C, Hayes A. The patient's role in the spread and control of  
16 bacterial resistance to antibiotics. *Clin Microbiol Infect* 2002;**8**:43–68.  
17 doi:10.1046/J.1469-0691.8.S.2.6.X  
18  
19  
20  
21 35 McNulty CAM, Cookson BD, Lewis MAO. Education of healthcare  
22 professionals and the public. *J Antimicrob Chemother* 2012;**67**:i11–8.  
23 doi:10.1093/jac/dks199  
24  
25  
26  
27 36 Little P, Stuart B, Francis N, *et al.* Effects of internet-based training on  
28 antibiotic prescribing rates for acute respiratory-tract infections: a  
29 multinational, cluster, randomised, factorial, controlled trial. *Lancet*  
30 2013;**382**:1175–82. doi:10.1016/S0140-6736(13)60994-0  
31  
32  
33  
34  
35  
36  
37 37 UK Five Year Antimicrobial Resistance Strategy 2013 to 2018.  
38 [https://assets.publishing.service.gov.uk/government/uploads/system/uploads/att](https://assets.publishing.service.gov.uk/government/uploads/system/uploads/attachment_data/file/244058/20130902_UK_5_year_AMR_strategy.pdf)  
39 [achment\\_data/file/244058/20130902\\_UK\\_5\\_year\\_AMR\\_strategy.pdf](https://assets.publishing.service.gov.uk/government/uploads/system/uploads/attachment_data/file/244058/20130902_UK_5_year_AMR_strategy.pdf)  
40 (accessed 5 Apr 2018).  
41  
42  
43  
44  
45 38 WHO Global Strategy for Containment of Antimicrobial Resistance WHO  
46 Global Strategy for Containment of Antimicrobial Resistance. World Health  
47 Organization.  
48 [http://www.who.int/drugresistance/WHO\\_Global\\_Strategy\\_English.pdf](http://www.who.int/drugresistance/WHO_Global_Strategy_English.pdf)  
49 (accessed 5 Apr 2018).  
50  
51  
52  
53  
54  
55  
56  
57  
58  
59  
60

- 1  
2  
3 39 Antibiotics and antibiotic resistance. NPS MedicineWise.  
4  
5 2018.[https://www.nps.org.au/medical-info/consumer-info/antibiotic-resistance-](https://www.nps.org.au/medical-info/consumer-info/antibiotic-resistance-the-facts)  
6  
7 the-facts (accessed 10 Apr 2018).  
8  
9 40 2017 Antibiotic Awareness Week Toolkit for Healthcare Organizations and  
10  
11 Professionals. [https://ipac-](https://ipac-canada.org/photos/custom/Members/pdf/2017_Antibiotic_Awareness_Toolkit(1).pdf)  
12  
13 [canada.org/photos/custom/Members/pdf/2017\\_Antibiotic\\_Awareness\\_Toolkit](https://ipac-canada.org/photos/custom/Members/pdf/2017_Antibiotic_Awareness_Toolkit(1).pdf)  
14  
15 (1).pdf (accessed 10 Apr 2018).  
16  
17 41 Consumer Updates - Combating Antibiotic Resistance.  
18  
19 2018.<https://www.fda.gov/ForConsumers/ConsumerUpdates/ucm092810.htm>  
20  
21 (accessed 10 Apr 2018).  
22  
23 42 Factsheet for the general public - Antimicrobial resistance.  
24  
25 [https://ecdc.europa.eu/en/antimicrobial-resistance/facts/factsheets/general-](https://ecdc.europa.eu/en/antimicrobial-resistance/facts/factsheets/general-public)  
26  
27 public (accessed 10 Apr 2018).  
28  
29 43 Llewelyn MJ, Fitzpatrick JM, Darwin E, *et al.* The antibiotic course has had its  
30  
31 day. *BMJ* 2017;;j3418. doi:10.1136/bmj.j3418  
32  
33  
34  
35  
36  
37  
38  
39  
40  
41  
42  
43  
44  
45  
46  
47  
48  
49  
50  
51  
52  
53  
54  
55  
56  
57  
58  
59  
60

1  
2  
3  
4  
5  
6  
7  
8  
9  
10  
11  
12  
13  
14  
15  
16  
17  
18  
19  
20  
21  
22  
23  
24  
25  
26  
27  
28  
29  
30  
31  
32  
33  
34  
35  
36  
37  
38  
39  
40  
41  
42  
43  
44  
45  
46  
47  
48  
49  
50  
51  
52  
53  
54  
55  
56  
57  
58  
59  
60

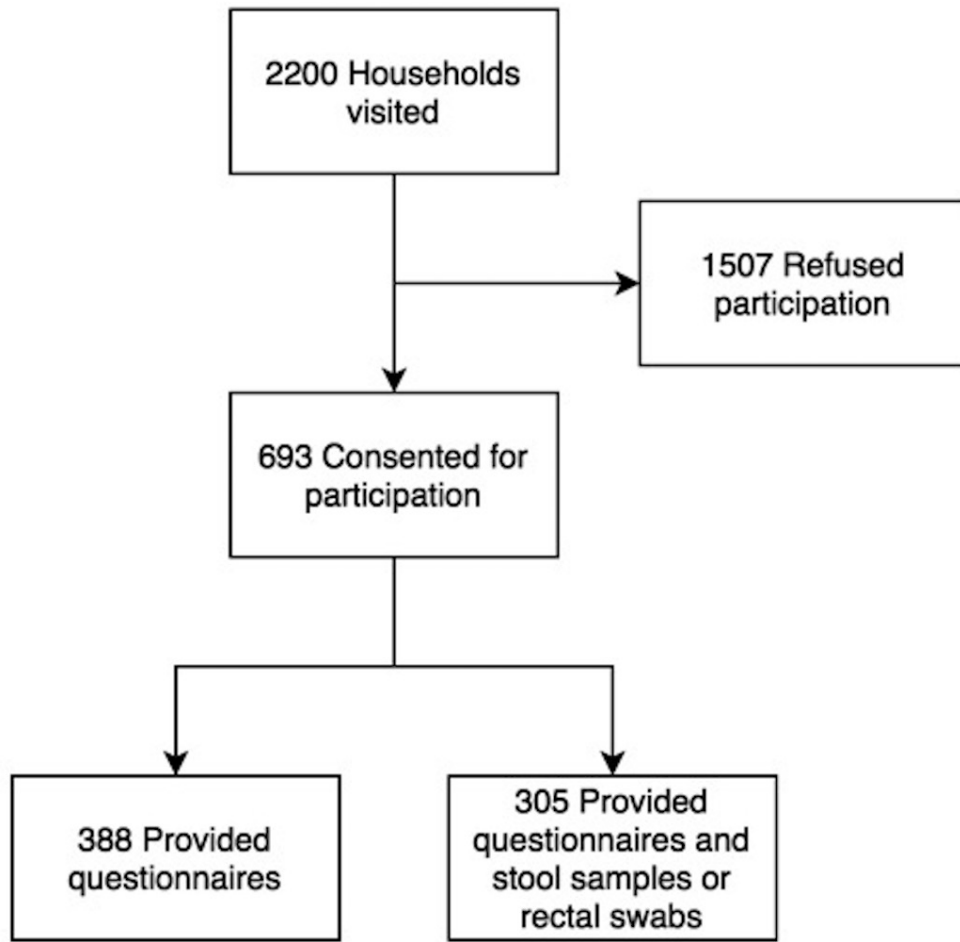

Figure S1. Participant recruitment flowchart

90x87mm (300 x 300 DPI)

Table S1. Study questionnaire

## Section 1: Background Data

1. Demographic Data
  - 1.1 Age
  - 1.2 Gender - Male or Female
2. Race - Chinese or Malay or Indian or Others
3. Educational Background
  - 2.1 Highest Education Level Attained- Primary Education or Secondary Education or Tertiary Education or Graduate Education or No formal education
4. Have you ever studied a healthcare-related course? (Medicine, Traditional Chinese Medicine, Therapy, Nursing) - Yes or No
- 3 Occupation and Financial Status
5. Occupation:
- 4 Accommodation
  - 4.1 Housing type- Public housing (1-Room or 2-Room or 3-Room or 4-Room or 5-Room or Executive Apartment) or Landed property
  - 4.2 How many occupants are there living in your house? (including you) Number of Occupants:
    - 4.3.1 How many people in the household are in the following age group? Less than 12 years old:
    - 4.3.2 How many people in the household are in the following age group? More than 65 years old:
6. Do you currently have any dogs or cats at home? - Yes or No
- 5 Travel history

- 1  
2  
3 5.3 Have you travelled to the following places within the past 6 months? – Yes or  
4  
5 No  
6  
7 5.3.1 If yes, which of the following places have you been to? (You may select more  
8  
9 than 1 option) - Southeast Asia (Malaysia, Thailand, Indonesia, Vietnam,  
10  
11 Cambodia etc) and/ or South Asia (India, Bangladesh, Sri Lanka) and/ or East  
12  
13 Asia (China, Korea, Japan) and/ or Europe and/ or South America and/ or  
14  
15 North America and/ or Middle East or Others:  
16  
17  
18 5.4 Have you lived anywhere else for more than 1 year? – Yes or No  
19  
20 6 If yes, did you live in the following areas? (You may select more than 1 option) -  
21  
22 Southeast Asia (Malaysia, Thailand, Indonesia, Vietnam, Cambodia etc) and/ or  
23  
24 South Asia (India, Bangladesh, Sri Lanka) and/ or East Asia (China, Korea,  
25  
26 Japan) and/ or Europe and/ or South America and/ or North America and/ or  
27  
28 Middle East or Others:  
29  
30  
31 7 Medical History  
32  
33 6.1 Do you have any of the following? (You can choose more than one of the  
34  
35 following) - Diabetes Mellitus and/ or Medications (Chemotherapy, Steroids,  
36  
37 Immunosuppressants etc) and/ or Other medical conditions or None of the above  
38  
39 6.2 When was your last hospitalisation? - Never been hospitalised before or  
40  
41 Hospitalised before  
42  
43 6.2.1 If yes, was this hospitalisation within the past 1 year? – Yes or No  
44  
45 6.2.2 How long was your stay? Duration:  
46  
47  
48 6.3 Have you used antibiotics before? - Have never used antibiotics before or Used  
49  
50 antibiotics before  
51  
52 6.3.1 If yes, when was the last time you started on antibiotics? - Within the last 6  
53  
54  
55  
56  
57  
58  
59  
60

months or More than 6 months ago

## Section 2: Assessment of Antibiotic Practices

### 1. Assessing Health-Seeking and Antibiotic-Seeking Behaviours

#### Scenario 1: Cough and Runny Nose

1.1.1 Would you go to the doctor for a cough and runny nose that lasted less than 1 week? – Yes or No or I am not sure

1.1.2 In the above scenario, did you expect the doctor to prescribe antibiotics to help with the recovery? – Yes or No or I am not sure

1.1.3 If the doctor you were seeing does not prescribe you antibiotics for the symptoms above, would you seek another doctor's opinion or firmly request the doctor for an antibiotic prescription? – Yes or No or I am not sure

#### Scenario 2: Diarrhoea and Vomiting

1.2.1 Would you go to the doctor for diarrhoea, vomiting and stomach pain that lasted less than a week? – Yes or No or I am not sure

1.2.2 In the above scenario, did you expect the doctor to prescribe antibiotics to help with the recovery? – Yes or No or I am not sure

1.2.3 If the doctor you were seeing does not prescribe you antibiotics for the symptoms above, would you seek another doctor's opinion or firmly request the doctor for an antibiotic prescription? – Yes or No or I am not sure

### 2. Assessing Practices of Disposal and Storage of Antibiotics

2.1 What do you usually do with leftover antibiotics? - Usually do not have leftovers



1  
2  
3 or Keep it for future use or Pour it down a sink or toilet bowl or Disposal in the  
4 rubbish bin or Others:

5  
6  
7  
8 **3. Assessing Alternative Antibiotic Practices**

9  
10 **3.1 Have you ever shared antibiotics with someone else? – Yes or No**

11  
12  
13 **3.2 Have you ever taken leftover antibiotics from a previous course of illness? – Yes**  
14 **or No**

15  
16  
17  
18  
19  
20  
21 **Section 3: Attitude Assessment**

22  
23  
24 **1. Attitudes Towards Healthcare Provider Prescription**

25  
26 **1.1 Sometimes my doctor prioritises what is beneficial for him over my medical**  
27 **needs. – Strongly agree or Agree or Neutral or Disagree or Strongly Disagree**

28  
29 **1.2 My doctor's medical skills are not as good as they should be. – Strongly agree or**  
30 **Agree or Neutral or Disagree or Strongly Disagree**

31  
32 **1.3 My doctor is always honest when telling me about all the available treatments for**  
33 **my condition. – Strongly agree or Agree or Neutral or Disagree or Strongly**  
34 **Disagree**

35  
36 **1.4 I have no worries about putting my life in my doctor's hands. – Strongly agree or**  
37 **Agree or Neutral or Disagree or Strongly Disagree**

38  
39  
40  
41 **2. Attitudes Towards Potential Educational Interventions**

42  
43 **2.1 Which of the following sources of medical information do you trust most? -**

44  
45 **Healthcare Professionals' Advice (Doctors, nurses, clinical assistants, therapists)**

46  
47 **or Family and Friends or Online Medical Sources or Television Programmes and**

48  
49 **Advertisements or Radio Programmes and Advertisements**

## Section 4: Knowledge Assessment

1. Knowledge on Function of Antibiotics
  - 1.1 Antibiotics are medicines that can treat viral infections. – True or False or I am not sure
  - 1.2 Antibiotics are medicines that can treat bacterial infections. – True or False or I am not sure
  - 1.3 Antibiotics are medicines that can treat fungal infections. – True or False or I am not sure
2. Knowledge on Agents of Infection
  - 2.1 Which of the following most commonly causes running nose and cough? – Viruses or Bacteria or I am not sure
  - 2.2 Which of the following most commonly causes diarrhoea? – Viruses or Bacteria or I am not sure
3. Knowledge on Proper Use of Antibiotics
  - 3.1 Antibiotics can be obtained at the pharmacist without any prescription. - True or False or I am not sure
  - 3.2 Antibiotics can be stopped when: - You start to feel better or You finish the entire course or You head back to the doctor and he tells you that you can stop
4. Knowledge on Concept of Antibiotic Resistance
  - 4.1 Do you understand what is antibiotic resistance? – Yes or No or I am unsure
    - 4.1.1 If yes, describe what causes antibiotic resistance?
  - 4.2 Which of the following is a consequence of antibiotic resistance? (choose only ONE option) - Antibiotics become more effective at treating infections or Antibiotics become less effective at treating infections or Your body immunity

1  
2  
3  
4  
5  
6  
7  
8  
9  
10  
11  
12  
13  
14  
15  
16  
17  
18  
19  
20  
21  
22  
23  
24  
25  
26  
27  
28  
29  
30  
31  
32  
33  
34  
35  
36  
37  
38  
39  
40  
41  
42  
43  
44  
45  
46  
47  
48  
49  
50  
51  
52  
53  
54  
55  
56  
57  
58  
59  
60

becomes weaker or Your body immunity becomes stronger

4.3 Antimicrobial resistance is not present in Singapore yet. – Yes or No or I am  
unsure

For peer review only

Table S2. Assessment of knowledge

| Questions |                                                                         |                              | N (%)        |
|-----------|-------------------------------------------------------------------------|------------------------------|--------------|
|           |                                                                         |                              | Total N= 693 |
| 2.1.1     | Antibiotics are medicines that can treat viral infections.              | False                        | 149 (21.5%)  |
|           |                                                                         | True                         | 335 (48.3%)  |
|           |                                                                         | Unsure                       | 209 (30.2%)  |
| 2.1.2     | Antibiotics are medicines that can treat bacterial infections.          | True                         | 419 (60.5%)  |
|           |                                                                         | False                        | 50 (7.2%)    |
|           |                                                                         | Unsure                       | 224 (32.3%)  |
| 2.1.3     | Antibiotics are medicines that can treat fungal infections.             | False                        | 157 (22.7%)  |
|           |                                                                         | True                         | 194 (28.0%)  |
|           |                                                                         | Unsure                       | 342 (49.4%)  |
| 2.1.4     | Which of the following most commonly causes running nose and cough.     | Viruses                      | 352 (50.8%)  |
|           |                                                                         | Bacteria                     | 130 (18.8%)  |
|           |                                                                         | Unsure                       | 211 (30.4%)  |
| 2.1.5     | Which of the following most commonly causes diarrhoea?                  | Viruses                      | 98 (14.1%)   |
|           |                                                                         | Bacteria                     | 385 (55.6%)  |
|           |                                                                         | Unsure                       | 210 (30.3%)  |
| 2.1.6     | Antibiotics can be stopped when...                                      | You finish the entire course | 554 (79.9%)  |
|           |                                                                         | When you feel better         | 95 (13.7%)   |
|           |                                                                         | Consult the doctor           | 44 (6.3%)    |
| 2.1.7     | Antibiotics can be obtained at the pharmacist without any prescription. | False                        | 564 (81.4%)  |
|           |                                                                         | True                         | 29 (4.2%)    |
|           |                                                                         | Unsure                       | 100 (14.4%)  |

|        |                                                                   |                                                            |             |
|--------|-------------------------------------------------------------------|------------------------------------------------------------|-------------|
| 2.1.8  | What causes antimicrobial resistance?<br>(Open ended)             | Inappropriate use of antibiotics                           | 121 (17.5%) |
|        |                                                                   | Wrong or unsure                                            | 572 (82.5%) |
| 2.1.9  | Which of the following is a consequence of antibiotic resistance? | Antibiotics becoming more effective at treating infections | 280 (40.4%) |
|        |                                                                   | Antibiotics becoming less effective at treating infections | 111 (16.0%) |
|        |                                                                   | Your body immunity becomes weaker                          | 235 (33.9%) |
|        |                                                                   | Your body immunity becomes stronger                        | 67 (9.7%)   |
| 2.1.10 | Antibiotic resistance is not present in Singapore yet.            | False                                                      | 255 (36.8%) |
|        |                                                                   | True                                                       | 77 (11.1%)  |
|        |                                                                   | Unsure                                                     | 361 (52.1%) |

Table S3. Assessment of attitude toward primary care

| Questions |                                                                                                | N (%)                            |            |
|-----------|------------------------------------------------------------------------------------------------|----------------------------------|------------|
|           |                                                                                                | N= 693                           |            |
| 2.2.1     | Sometimes my doctor prioritises what is beneficial for him over my medical needs               | Strongly agree                   | 14 (2.0)   |
|           |                                                                                                | Agree                            | 109 (15.7) |
|           |                                                                                                | Neutral                          | 145 (20.9) |
|           |                                                                                                | Disagree                         | 335 (48.3) |
|           |                                                                                                | Strongly disagree                | 90 (13.0)  |
| 2.2.2     | My doctor's medical skills are not as good as they should be                                   | Strongly agree                   | 10 (1.4)   |
|           |                                                                                                | Agree                            | 83 (12.0)  |
|           |                                                                                                | Neutral                          | 150 (21.6) |
|           |                                                                                                | Disagree                         | 373 (53.8) |
|           |                                                                                                | Strongly disagree                | 77 (11.1)  |
| 2.2.3     | My doctor is always honest when telling me about all the available treatments for my condition | Strongly agree                   | 100 (14.4) |
|           |                                                                                                | Agree                            | 427 (61.6) |
|           |                                                                                                | Neutral                          | 115 (16.6) |
|           |                                                                                                | Disagree                         | 45 (6.5)   |
|           |                                                                                                | Strongly disagree                | 6 (0.9)    |
| 2.2.4     | I have no worries about putting my life in my doctor's hands                                   | Strongly agree                   | 110 (15.9) |
|           |                                                                                                | Agree                            | 363 (52.4) |
|           |                                                                                                | Neutral                          | 135 (19.5) |
|           |                                                                                                | Disagree                         | 74 (10.7)  |
|           |                                                                                                | Strongly disagree                | 11 (1.6)   |
| 2.2.5     | Which of the following sources of medical information do you trust most?                       | Healthcare professional's advice | 627 (90.6) |
|           |                                                                                                | Family and friends               | 36 (5.2)   |
|           |                                                                                                | Online medical sources           | 24 (3.5)   |

1  
2  
3  
4  
5  
6  
7  
8  
9  
10  
11  
12  
13  
14  
15  
16  
17  
18  
19  
20  
21  
22  
23  
24  
25  
26  
27  
28  
29  
30  
31  
32  
33  
34  
35  
36  
37  
38  
39  
40  
41  
42  
43  
44  
45  
46  
47  
48  
49  
50  
51  
52  
53  
54  
55  
56  
57  
58  
59  
60

|  |  |                                          |         |
|--|--|------------------------------------------|---------|
|  |  | Television programmes and advertisements | 4 (0.6) |
|  |  | Radio programmes and advertisements      | 1 (0.1) |

For peer review only

Table S4. Assessment of practices

| Questions |                                                                                                                                                                                                                                            | N (%)                   |            |
|-----------|--------------------------------------------------------------------------------------------------------------------------------------------------------------------------------------------------------------------------------------------|-------------------------|------------|
|           |                                                                                                                                                                                                                                            | Total N= 693            |            |
| 2.3.1.1   | Would you go to the doctor for a cough and runny nose that lasted less than 1 week                                                                                                                                                         | Yes                     | 294 (42.4) |
|           |                                                                                                                                                                                                                                            | No                      | 377 (54.4) |
|           |                                                                                                                                                                                                                                            | Unsure                  | 22 (3.2)   |
| 2.3.1.2   | Would you go to the doctor for diarrhoea, vomiting and stomach pain that lasted less than 1 week?                                                                                                                                          | Yes                     | 414 (59.7) |
|           |                                                                                                                                                                                                                                            | No                      | 262 (37.8) |
|           |                                                                                                                                                                                                                                            | Unsure                  | 17 (2.5)   |
| 2.3.2.1   | Would you expect the doctor to prescribe antibiotics for cough and runny nose that lasted less than 1 week to help with the recovery?                                                                                                      | Yes                     | 136 (19.6) |
|           |                                                                                                                                                                                                                                            | No                      | 508 (73.3) |
|           |                                                                                                                                                                                                                                            | Unsure                  | 49 (7.1)   |
| 2.3.2.2   | Would you expect the doctor to prescribe antibiotics for diarrhoea, vomiting and stomach pain that lasted less than 1 week to help with the recovery?                                                                                      | Yes                     | 120 (17.3) |
|           |                                                                                                                                                                                                                                            | No                      | 501 (72.3) |
|           |                                                                                                                                                                                                                                            | Unsure                  | 72 (10.4)  |
| 2.3.3.1   | If the doctor you were seeing does not prescribe you antibiotics for cough and runny nose that lasted less than 1 week, would you seek another doctor's opinion or firmly request the doctor for an antibiotic prescription?               | Yes                     | 37 (5.3)   |
|           |                                                                                                                                                                                                                                            | No                      | 619 (89.3) |
|           |                                                                                                                                                                                                                                            | Unsure                  | 37 (5.3)   |
| 2.3.3.2   | If the doctor you were seeing does not prescribe you antibiotics for diarrhea vomiting and stomach pain that lasted less than 1 week, would you seek another doctor's opinion or firmly request the doctor for an antibiotic prescription? | Yes                     | 40 (5.8)   |
|           |                                                                                                                                                                                                                                            | No                      | 615 (88.7) |
|           |                                                                                                                                                                                                                                            | Unsure                  | 38 (5.5)   |
| 2.3.4.1   | What do you usually do with left over antibiotics?                                                                                                                                                                                         | No left overs           | 476 (68.7) |
|           |                                                                                                                                                                                                                                            | Disposal in rubbish bin | 130 (18.8) |
|           |                                                                                                                                                                                                                                            | Keep for future use     | 60 (8.7)   |



|         |                                                                             |                               |            |
|---------|-----------------------------------------------------------------------------|-------------------------------|------------|
|         |                                                                             | Unsure                        | 19 (2.7)   |
|         |                                                                             | Pour down sink or toilet bowl | 8 (1.2)    |
| 2.3.4.2 | Have you ever shared antibiotics with anyone else?                          | Yes                           | 23 (3.3)   |
|         |                                                                             | No                            | 670 (94.5) |
| 2.3.4.3 | Have you ever taken leftover antibiotics from a previous course of illness? | Yes                           | 38 (5.5)   |
|         |                                                                             | No                            | 655 (9.5)  |

**STROBE 2007 (v4) checklist of items to be included in reports of observational studies in epidemiology\***  
**Checklist for cohort, case-control, and cross-sectional studies (combined)**

| Section/Topic             | Item # | Recommendation                                                                                                                                                                                                                                                                                                                                                                                                                                                         | Reported on page # |
|---------------------------|--------|------------------------------------------------------------------------------------------------------------------------------------------------------------------------------------------------------------------------------------------------------------------------------------------------------------------------------------------------------------------------------------------------------------------------------------------------------------------------|--------------------|
| Title and abstract        | 1      | (a) Indicate the study's design with a commonly used term in the title or the abstract                                                                                                                                                                                                                                                                                                                                                                                 | 2                  |
|                           |        | (b) Provide in the abstract an informative and balanced summary of what was done and what was found                                                                                                                                                                                                                                                                                                                                                                    | 2                  |
| <b>Introduction</b>       |        |                                                                                                                                                                                                                                                                                                                                                                                                                                                                        |                    |
| Background/rationale      | 2      | Explain the scientific background and rationale for the investigation being reported                                                                                                                                                                                                                                                                                                                                                                                   | 4                  |
| Objectives                | 3      | State specific objectives, including any pre-specified hypotheses                                                                                                                                                                                                                                                                                                                                                                                                      | 4                  |
| <b>Methods</b>            |        |                                                                                                                                                                                                                                                                                                                                                                                                                                                                        |                    |
| Study design              | 4      | Present key elements of study design early in the paper                                                                                                                                                                                                                                                                                                                                                                                                                | 4-8                |
| Setting                   | 5      | Describe the setting, locations, and relevant dates, including periods of recruitment, exposure, follow-up, and data collection                                                                                                                                                                                                                                                                                                                                        | 4-5                |
| Participants              | 6      | (a) <i>Cohort study</i> —Give the eligibility criteria, and the sources and methods of selection of participants. Describe methods of follow-up<br><i>Case-control study</i> —Give the eligibility criteria, and the sources and methods of case ascertainment and control selection. Give the rationale for the choice of cases and controls<br><i>Cross-sectional study</i> —Give the eligibility criteria, and the sources and methods of selection of participants | 4-5                |
|                           |        | (b) <i>Cohort study</i> —For matched studies, give matching criteria and number of exposed and unexposed<br><i>Case-control study</i> —For matched studies, give matching criteria and the number of controls per case                                                                                                                                                                                                                                                 | NA                 |
| Variables                 | 7      | Clearly define all outcomes, exposures, predictors, potential confounders, and effect modifiers. Give diagnostic criteria, if applicable                                                                                                                                                                                                                                                                                                                               | 5-7                |
| Data sources/ measurement | 8*     | For each variable of interest, give sources of data and details of methods of assessment (measurement). Describe comparability of assessment methods if there is more than one group                                                                                                                                                                                                                                                                                   | 4-8                |
| Bias                      | 9      | Describe any efforts to address potential sources of bias                                                                                                                                                                                                                                                                                                                                                                                                              | 4-5                |
| Study size                | 10     | Explain how the study size was arrived at                                                                                                                                                                                                                                                                                                                                                                                                                              | 4-5                |
| Quantitative variables    | 11     | Explain how quantitative variables were handled in the analyses. If applicable, describe which groupings were chosen and why                                                                                                                                                                                                                                                                                                                                           | 7-8                |
| Statistical methods       | 12     | (a) Describe all statistical methods, including those used to control for confounding                                                                                                                                                                                                                                                                                                                                                                                  | 7-8                |
|                           |        | (b) Describe any methods used to examine subgroups and interactions                                                                                                                                                                                                                                                                                                                                                                                                    | 7-8                |
|                           |        | (c) Explain how missing data were addressed                                                                                                                                                                                                                                                                                                                                                                                                                            | NA                 |
|                           |        | (d) <i>Cohort study</i> —If applicable, explain how loss to follow-up was addressed<br><i>Case-control study</i> —If applicable, explain how matching of cases and controls was addressed                                                                                                                                                                                                                                                                              | 4-5                |

|                          |     |                                                                                                                                                                                                              |                        |
|--------------------------|-----|--------------------------------------------------------------------------------------------------------------------------------------------------------------------------------------------------------------|------------------------|
|                          |     | <i>Cross-sectional study</i> —If applicable, describe analytical methods taking account of sampling strategy                                                                                                 |                        |
|                          |     | (e) Describe any sensitivity analyses                                                                                                                                                                        | NA                     |
| <b>Results</b>           |     |                                                                                                                                                                                                              |                        |
| Participants             | 13* | (a) Report numbers of individuals at each stage of study—eg numbers potentially eligible, examined for eligibility, confirmed eligible, included in the study, completing follow-up, and analysed            | 8                      |
|                          |     | (b) Give reasons for non-participation at each stage                                                                                                                                                         | 8                      |
|                          |     | (c) Consider use of a flow diagram                                                                                                                                                                           | Supplementary material |
| Descriptive data         | 14* | (a) Give characteristics of study participants (eg demographic, clinical, social) and information on exposures and potential confounders                                                                     | 8-9                    |
|                          |     | (b) Indicate number of participants with missing data for each variable of interest                                                                                                                          | NA                     |
|                          |     | (c) <i>Cohort study</i> —Summarise follow-up time (eg, average and total amount)                                                                                                                             | NA                     |
| Outcome data             | 15* | <i>Cohort study</i> —Report numbers of outcome events or summary measures over time                                                                                                                          | NA                     |
|                          |     | <i>Case-control study</i> —Report numbers in each exposure category, or summary measures of exposure                                                                                                         | NA                     |
|                          |     | <i>Cross-sectional study</i> —Report numbers of outcome events or summary measures                                                                                                                           | 9-15                   |
| Main results             | 16  | (a) Give unadjusted estimates and, if applicable, confounder-adjusted estimates and their precision (eg, 95% confidence interval). Make clear which confounders were adjusted for and why they were included | 9-15                   |
|                          |     | (b) Report category boundaries when continuous variables were categorized                                                                                                                                    | 9-15                   |
|                          |     | (c) If relevant, consider translating estimates of relative risk into absolute risk for a meaningful time period                                                                                             | NA                     |
| Other analyses           | 17  | Report other analyses done—eg analyses of subgroups and interactions, and sensitivity analyses                                                                                                               | 9-15                   |
| <b>Discussion</b>        |     |                                                                                                                                                                                                              |                        |
| Key results              | 18  | Summarise key results with reference to study objectives                                                                                                                                                     | 15-17                  |
| Limitations              | 19  | Discuss limitations of the study, taking into account sources of potential bias or imprecision. Discuss both direction and magnitude of any potential bias                                                   | 17                     |
| Interpretation           | 20  | Give a cautious overall interpretation of results considering objectives, limitations, multiplicity of analyses, results from similar studies, and other relevant evidence                                   | 15-17                  |
| Generalisability         | 21  | Discuss the generalisability (external validity) of the study results                                                                                                                                        | 15-17                  |
| <b>Other information</b> |     |                                                                                                                                                                                                              |                        |
| Funding                  | 22  | Give the source of funding and the role of the funders for the present study and, if applicable, for the original study on which the present article is based                                                | 19-20                  |

\*Give information separately for cases and controls in case-control studies and, if applicable, for exposed and unexposed groups in cohort and cross-sectional studies.

1  
2  
3  
4 **Note:** An Explanation and Elaboration article discusses each checklist item and gives methodological background and published examples of transparent reporting. The STROBE  
5 checklist is best used in conjunction with this article (freely available on the Web sites of PLoS Medicine at <http://www.plosmedicine.org/>, Annals of Internal Medicine at  
6 <http://www.annals.org/>, and Epidemiology at <http://www.epidem.com/>). Information on the STROBE Initiative is available at [www.strobe-statement.org](http://www.strobe-statement.org).  
7  
8  
9  
10  
11  
12  
13  
14  
15  
16  
17  
18  
19  
20  
21  
22  
23  
24  
25  
26  
27  
28  
29  
30  
31  
32  
33  
34  
35  
36  
37  
38  
39  
40  
41  
42  
43  
44  
45  
46  
47

For peer review only

# BMJ Open

## Relating knowledge, attitude and practice of antibiotic use to extended spectrum Beta-Lactamase producing Enterobacteriaceae carriage – results of a Singapore Community Survey

|                                 |                                                                                                                                                                                                                                                                                                                                                                                                                                                                                                                                                                                                                                                                                                                                                                                                                                                                                                                                                                |
|---------------------------------|----------------------------------------------------------------------------------------------------------------------------------------------------------------------------------------------------------------------------------------------------------------------------------------------------------------------------------------------------------------------------------------------------------------------------------------------------------------------------------------------------------------------------------------------------------------------------------------------------------------------------------------------------------------------------------------------------------------------------------------------------------------------------------------------------------------------------------------------------------------------------------------------------------------------------------------------------------------|
| Journal:                        | <i>BMJ Open</i>                                                                                                                                                                                                                                                                                                                                                                                                                                                                                                                                                                                                                                                                                                                                                                                                                                                                                                                                                |
| Manuscript ID                   | bmjopen-2018-023859.R1                                                                                                                                                                                                                                                                                                                                                                                                                                                                                                                                                                                                                                                                                                                                                                                                                                                                                                                                         |
| Article Type:                   | Research                                                                                                                                                                                                                                                                                                                                                                                                                                                                                                                                                                                                                                                                                                                                                                                                                                                                                                                                                       |
| Date Submitted by the Author:   | 21-Nov-2018                                                                                                                                                                                                                                                                                                                                                                                                                                                                                                                                                                                                                                                                                                                                                                                                                                                                                                                                                    |
| Complete List of Authors:       | Mo, Yin; National University Health System, Division of Infectious Diseases, University Medicine Cluster; Mahidol Oxford Tropical Medicine Research Unit<br>Seah, Ivan; National University Singapore Yong Loo Lin School of Medicine<br>Lye, Pei Shi Priscillia ; National University Singapore Yong Loo Lin School of Medicine<br>Kee, Xiang Lee Jamie ; National University Singapore Yong Loo Lin School of Medicine<br>Wong, Kien Yee Michael; National University Singapore Yong Loo Lin School of Medicine<br>Ko, Kwan Ki Karrie ; Singapore General Hospital, Department of Microbiology<br>Ong, Rick Twee-Hee ; National University Singapore Saw Swee Hock School of Public Health<br>Tambyah, Paul; National University Health System, Division of Infectious Diseases, University Medicine Cluster; National University of Singapore, Department of Medicine<br>Cook, Alex R ; National University Singapore Saw Swee Hock School of Public Health |
| <b>Primary Subject Heading</b>: | Infectious diseases                                                                                                                                                                                                                                                                                                                                                                                                                                                                                                                                                                                                                                                                                                                                                                                                                                                                                                                                            |
| Secondary Subject Heading:      | Public health, Epidemiology                                                                                                                                                                                                                                                                                                                                                                                                                                                                                                                                                                                                                                                                                                                                                                                                                                                                                                                                    |
| Keywords:                       | Extended-spectrum beta-lactamase producing Enterobacteriaceae, Antimicrobial resistance, Duration of antibiotic treatment                                                                                                                                                                                                                                                                                                                                                                                                                                                                                                                                                                                                                                                                                                                                                                                                                                      |
|                                 |                                                                                                                                                                                                                                                                                                                                                                                                                                                                                                                                                                                                                                                                                                                                                                                                                                                                                                                                                                |

SCHOLARONE™  
Manuscripts

1  
2  
3 Relating knowledge, attitude and practice of antibiotic use to extended spectrum Beta-  
4  
5 Lactamase producing *Enterobacteriaceae* carriage – results of a Singapore  
6  
7  
8 Community Survey  
9  
10  
11  
12  
13

14 Yin MO<sup>1, 2, 3\*</sup>, Ivan SEAH<sup>4\*</sup>, Pei Shi Priscillia LYE<sup>4</sup>, Xiang Lee Jamie KEE<sup>4</sup>, Kien  
15  
16 Yee Michael WONG<sup>4</sup>, Kwan Ki Karrie KO<sup>5</sup>, Rick Twee-Hee ONG<sup>6</sup>, Paul  
17  
18 Anantharajah TAMBYAH<sup>1, 2</sup>, Alex R COOK<sup>6</sup>  
19  
20  
21  
22  
23  
24  
25

26 1. Division of Infectious Disease, University Medicine Cluster, National University  
27  
28 Hospital, 5 Lower Kent Ridge Road Singapore 119074; 2. Department of Medicine,  
29  
30 National University of Singapore, 21 Lower Kent Ridge Road Singapore 119077; 3.  
31  
32 Mahidol Oxford Tropical Medicine Research Unit, 420/6 Rajvithi Road,  
33  
34 Tunphyathai, Bangkok 10400; 4. Yong Loo Lin School of Medicine, 1E Kent Ridge  
35  
36 Road Singapore 119228; 5. Department of Microbiology, Singapore General  
37  
38 Hospital, Outram Road Singapore 169608; 6. Saw Swee Hock School of Public  
39  
40 Health, National University of Singapore, 21 Lower Kent Ridge Road Singapore  
41  
42 119077  
43  
44  
45  
46  
47  
48

49 \* Authors contributed to this work equally.  
50  
51  
52  
53

54 Correspondence to: Yin Mo [yin\\_mo@nuhs.edu.sg](mailto:yin_mo@nuhs.edu.sg) +65 67795555  
55  
56  
57

58 Word count: 2736  
59  
60

## ABSTRACT

Objectives: To study the correlation between knowledge, attitude and practices (KAP) of antibiotic consumption with epidemiology and molecular characteristics of ESBL-producing *Enterobacteriaceae* (ESBL-PE) carriage, in order to identify modifiable factors and public health interventions to reduce prevalence of multidrug resistant organism (MDRO) colonisation in the community.

Design: Cross-sectional questionnaire of KAP towards antibiotic use and collection of stool samples or rectal swabs. ESBL-PE isolates obtained underwent whole genome sequencing to identify resistance genes.

Setting: A densely populated community in Singapore

Participants: There were 693 healthy community-dwelling questionnaire respondents. Out of which, 305 provided stool samples or rectal swabs.

Results: The overall knowledge of antibiotic use was poor (mean score 4.6/10, IQR 3.0-6.0). 80 participants (80/305, 26.2%) carried at least one ESBL-PE isolate. The most common ESBL-PE was *E. coli* sequence type 131 carrying CTX-M type beta-lactamases (11/71, 15.5%). Living overseas for more than 1 year (OR 3.3, 95% CI 1.6 to 6.9) but not short-term travel, recent hospitalisation or antibiotic intake was associated with ESBL-PE carriage. Interestingly, higher knowledge scores (OR 2.0, 95%CI 1.03 to 3.9) and having no left over antibiotics (OR 2.4, 95%CI 1.2 to 4.9) were independent factors associated with ESBL-PE carriage in the multivariate logistic regression model.

Conclusions: While the role of trans-border transmission of antimicrobial resistance is well known, we may have to examine the current recommendation that all antibiotics courses have to be completed. Clinical trials to determine the optimum duration of treatment for common infections are critically important.

(246 words)

## ARTICLE SUMMARY

### Strengths and limitations of this study

- Understanding antibiotic consumption behavior of the patients and general public is a research priority in the fight against antimicrobial resistance. Correlation of this behavior with multidrug resistance colonisation at a population level has the potential to influence public health messages and policies but is under-explored.
- Our study found a high prevalence of extended spectrum beta-lactamase producing *Enterobacteriaceae* asymptomatic carriage in a country with strict antibiotic prescription policies, and this is independently associated with not having left over antibiotics.
- To our knowledge, this is the first study that explored antibiotic consumption behavior with the acquisition of MDRO at a community level. This novel approach has the potential to guide clinicians and policy makers in identifying directly actionable interventions for the population.
- The main weakness of our study is that the questionnaire data is self-reported and subjected to recall and interviewer biases. We minimised these errors by designing specific questions that are carefully constructed to maximize accuracy and completeness, and all interviewers were trained to adhere to the question and answer format strictly.
- Given that the minimum effective treatment durations have not been determined for many infections and that a significant proportion of antibiotic prescriptions are inappropriate, the widely accepted message on the necessity to complete antibiotic courses to reduce antibiotic resistance may have to be re-examined.



## INTRODUCTION

Multidrug resistant *Enterobacteriaceae* (MDRE) have been identified as “critical priority” resistant organisms by the World Health Organization (WHO) in 2017, and are associated with a high overall all-cause mortality, transmissibility and burden.[1] Resistance in *Enterobacteriaceae* is most commonly mediated via the production of extended-spectrum beta-lactamases (ESBL) and carbapenemases.[2] MDRE infections are difficult to treat with few effective antimicrobials on the horizon.[1] Healthy members of the community are increasingly identified as a reservoir of antimicrobial resistance (AMR), especially in the case of ESBL-producing *Enterobacteriaceae* (ESBL-PE).[3] Asymptomatic carriage of ESBL-PE has been associated with more infections, longer hospitalisations, earlier time to death, and higher hospital costs.[4,5]

South East Asian (SEA) countries are known to be a hot spot for AMR.[6] However, the region is heterogeneous with varying healthcare standards and antimicrobial stewardship and utilisation policies.[7] To aid in designing effective public health policies and engage the community in the campaign against AMR, it is crucial to understand the local knowledge, attitude and practices of antibiotic use. This study aims to correlate the epidemiological and behavioral risk factors of ESBL-PE carriage in Singapore, a high-income country in SEA, as well as delineate the genetic mechanisms associated with these resistant organisms.

## METHODOLOGY

### Study population

1  
2  
3 The study was carried out in Clementi Township, a densely populated residential area  
4 in the west of Singapore. It comprises 27,142 households with 91,630 residents who  
5 are socio-demographically comparable to the general Singapore population in terms  
6 of age, gender, ethnicity and housing distribution.[8] The study team returned to non-  
7 responding households for up to three times on separate days to maximise the  
8 response rate. The first adult above 21 years old in each household who responded to  
9 the study team was invited to participate in this cross-sectional study; all consenting  
10 individuals undertook a questionnaire, while some additionally consented to provide a  
11 rectal swab or stool sample. To calculate the number of samples required to estimate  
12 the prevalence of ESBL-PE in the community, we used one-sample Z-test with an  
13 estimated prevalence of 50%, a confidence interval of 95% and maximum tolerable  
14 error of 10%. This yielded about 100 stool samples. Ethical approval was obtained  
15 from National University of Singapore Institutional Review Board (Reference number  
16 B-16-245).

### 17 18 19 20 21 22 23 24 25 26 27 28 29 30 31 32 33 34 35 36 37 38 **Questionnaire on knowledge, attitudes and practices (KAP) on antibiotic intake** 39 40 **and health-seeking behaviour**

41 We conducted a questionnaire study to assess the KAP of participants towards  
42 antibiotic use. A 40-item questionnaire was developed after performing a thorough  
43 literature review of comparable studies.[9–14] This was then validated by a pilot  
44 study involving 75 community-dwelling volunteers to ensure fluency and accuracy in  
45 question design and language. A team of thirty-three investigators was trained to  
46 administer the survey face-to-face, in languages that the participants are fluent in with  
47 standardised explanations, to ensure consistency.  
48  
49  
50  
51  
52  
53  
54  
55  
56  
57  
58  
59  
60

1  
2  
3 The questionnaire comprised four main sections. The first covered socio-demographic  
4 data and recent antibiotic intake. The second was an assessment of antibiotic  
5 consumption practices, in which two hypothetical scenarios of diarrhoea and upper  
6 respiratory tract symptoms were presented, and participants were asked if they would  
7 visit the doctor should they experience these symptoms for less than 1 week, if they  
8 would expect or insist on an antibiotic prescription from the doctor's visit, and if they  
9 would seek a second opinion if antibiotics were not prescribed. The third component  
10 assessed participants' attitudes and trust towards primary care healthcare providers,  
11 and was adapted from a validated questionnaire from Hall *et al.*[15] The last  
12 component examined participants' knowledge on AMR. The full questionnaire and  
13 grading system can be found in Table S1.  
14  
15  
16  
17  
18  
19  
20  
21  
22  
23  
24  
25  
26  
27  
28  
29  
30

### 31 **Bacterial isolation and antibiotic susceptibility testing**

32  
33 The study team requested fresh stool samples or rectal swabs from all study  
34 participants. The samples of those who consented were collected from the participants  
35 within 24 hours of production and stored centrally at 0-4°C prior to microbiological  
36 processing. All sample processing was carried out in the Singapore General Hospital  
37 Diagnostic Bacteriology Laboratory. Samples were inoculated onto *CHROMagar<sup>TM</sup>*  
38 *ESBL* and *CHROMID<sup>®</sup> CARBA SMART (bioMerieux)* media to detect cephalosporin-  
39 resistant and carbapenem-resistant Gram-negative bacteria, respectively. After 24  
40 hours of incubation, growing colonies were sub-cultured onto sheep blood agar and  
41 used for subsequent species identification and antibiotic susceptibility testing. Species  
42 identification was done by matrix-assisted laser desorption/ionization-time of flight  
43 mass spectrometry (MALDI-TOF MS) (Bruker) and the Vitek-2 (*bioMerieux*) system.  
44  
45  
46  
47  
48  
49  
50  
51  
52  
53  
54  
55  
56  
57  
58  
59  
60

1  
2  
3 Antibiotic susceptibilities to ampicillin, cefazolin, ceftriaxone, ceftiofur, cefepime,  
4 amoxicillin-clavulanic acid, piperacillin-tazobactam, aztreonam, amikacin,  
5 nitrofurantoin, sulfamethoxazole-trimethoprim, gentamicin, ciprofloxacin, fosfomycin,  
6 ertapenem and meropenem were assessed by the disc diffusion method and  
7 interpreted according to the Clinical Laboratory Standards Institute (CLSI)  
8 criteria.[16] *Enterobacteriaceae* isolates that were not susceptible to third/ fourth  
9 generation cephalosporins were identified as potential ESBL producers, while those  
10 not susceptible to any carbapenem were identified as potential carbapenemase  
11 producers. Potential carbapenemase producers were tested phenotypically for  
12 carbapenemase production by modified Hodge test and KPC/MBL and OXA-48  
13 Confirm Kit (ROSCO). All potential carbapenemase producers were also subjected to  
14 the Xpert® Carba-R test (Cepheid) targeting KPC, NDM, OXA-48 like, IMP and VIM  
15 carbapenemase gene sequences.

### 36 **Whole genome sequencing of ESBL-producing *Enterobacteriaceae***

37  
38 DNA extraction was performed for all *Enterobacteriaceae* isolates that are potentially  
39 ESBL- or carbapenemase- producers, with sequencing libraries for each isolate  
40 prepared as per manufacturer's recommendation to be multiplexed sequenced on the  
41 Illumina HiSEQ platform generating paired-end sequence reads of 2x150 basepairs,  
42 having a data throughput of 1GB per isolate. De-novo assembly of the Illumina reads  
43 was performed using the SPAdes Genome Assembler.[17] Bacterial species were  
44 identified using Kraken,[18] comparing with phenotypic results. Multi-locus sequence  
45 types (MLSTs) were determined by a customized script utilising BLAST search for  
46 identification of genotypes at each loci.[19] Genotypic prediction of antimicrobial  
47  
48  
49  
50  
51  
52  
53  
54  
55  
56  
57  
58  
59  
60

1  
2  
3 resistance owing to the existence of specific gene sequences were performed using  
4  
5 SRST2.[20]  
6  
7  
8  
9

### 10 **Statistical Analysis**

11  
12 Univariate descriptive analyses are presented for socio-demographics, ESBL-PE or C-  
13  
14 PE carriage status and presence of specific resistance genes. Dichotomous variables  
15  
16 are expressed in frequencies and percentages, while continuous variables are in means  
17  
18 with standard deviation (SD). Categorical variables are compared with  $\chi^2$  and Fisher's  
19  
20 exact tests and continuous variables with unpaired, 2-tailed t tests or nonparametric  
21  
22 Wilcoxon rank sum tests as appropriate. Linear and logistic regressions are used in  
23  
24 multivariate analyses to identify statistically significant factors that influence and  
25  
26 determine KAP and ESBL-PE carriage. Covariates that were found to be statistically  
27  
28 significant in the univariate analyses were included in the multivariate models. All  
29  
30 tests of significance are performed at  $\alpha=5\%$ . Statistical analysis was carried out using  
31  
32 R Version 1.1.383.[21]  
33  
34  
35  
36  
37  
38  
39

### 40 **Patient and Public Involvement**

41  
42 A group of 75 community dwellers partnered with us for the design and validation of  
43  
44 the study questionnaire to ensure clarity and accuracy, production of informational  
45  
46 material to support recruitment, and evaluation of the burden of the sample collection  
47  
48 from the patient's perspective. Because there was no clear preference for the sample  
49  
50 collection methodology, the study team decided to offer both options of rectal swab  
51  
52 and stool collection to the study participants.  
53  
54  
55  
56  
57

### 58 **RESULTS**

From June 2016 to April 2017, we randomly selected 2,200 households in Clementi for home visits. Out of these 2200 households, 693 (31.5%) agreed to participate, of whom 305 (44.0%) also provided stool samples or rectal swabs (Figure S1). Participant demographics are presented in Table 1. The median age of participants was 53 (IQR 38-66). A slight majority were women (393/693, 56.7%). The ethnic distribution of the participants was similar to the wider Singapore population, with 513 (74.0%) Chinese, 78 (11.3%) Malay, and 83 (12.0%) Indian. The majority had received at least secondary school education (534/693, 77.0%), and stayed in public housing apartments (661/693, 95.4%). The median number of occupants per household was 3 (IQR 2-4) persons. A quarter (25.3%, 175/693) reported having taken antibiotics in the past 6 months, and 102 (14.7%) had recently been hospitalised in the past 1 year.

Table 1. Demographics, medical background and antibiotic use of study participants

| Characteristic                       |                                | N (%)            |
|--------------------------------------|--------------------------------|------------------|
|                                      |                                | Total N=693      |
| Age (median, IQR*)                   |                                | 53.0 (38.0-66.0) |
| Females                              |                                | 393 (56.7)       |
| Race                                 | Chinese                        | 513 (74.0)       |
|                                      | Malay                          | 78 (11.3)        |
|                                      | Indian                         | 83 (12.0)        |
|                                      | Other ethnicities              | 19 (2.7)         |
| Education level                      | Graduate                       | 88 (12.7)        |
|                                      | Diploma                        | 251 (36.2)       |
|                                      | Secondary                      | 195 (28.1)       |
|                                      | Primary                        | 122 (17.6)       |
|                                      | No Formal Education            | 37 (5.3)         |
| Housing type                         | 1-, 2 or 3-room public housing | 334 (48.2)       |
|                                      | 4 or 5- room public housing    | 327 (47.2)       |
|                                      | Private landed property        | 32 (4.6)         |
| Number of occupants in the household | Overall (median, IQR)          | 3 (2-4)          |
|                                      | ≤ 3 persons                    | 369 (53.2)       |
|                                      | 4-5 persons                    | 257 (37.1)       |
|                                      | ≥ 6 persons                    | 67 (9.7)         |

|                                           |                         |            |
|-------------------------------------------|-------------------------|------------|
| Comorbidities                             | Any chronic illnesses   | 239 (34.5) |
|                                           | Hypertension            | 105 (15.2) |
|                                           | Hyperlipidemia          | 76 (11.0)  |
|                                           | Diabetes mellitus       | 67 (9.7)   |
| Recent hospitalisation in the past 1 year |                         | 102 (14.7) |
| Antibiotic consumption                    | Within past 6 months    | 175 (25.3) |
|                                           | More than 6 months ago  | 441 (63.6) |
|                                           | Never taken antibiotics | 77 (11.1)  |

\*IQR- interquartile range, ^Immunocompromised – Use of chemotherapy, corticosteroids or immunosuppressants in the past 6 months

The survey revealed widespread misinformation about antibiotics, with a mean knowledge score of only 4.6 (IQR 3.0-6.0) out of 10 (Table S2). Although the majority of participants knew that viruses are the most common cause of upper respiratory tract infections, a significant proportion (335/693, 48.3%) believed that antibiotics could be used for viral infections and 385 (385/693, 55.6%) thought that the most common cause of diarrhoea was bacteria. The questionnaire also explored participants' compliance to the widely accepted view of completing antibiotic courses. The majority (554/693, 79.9%) said they would complete the course of antibiotics prescribed, while 13.7% (95/693) would stop taking antibiotics when they start to feel better, and 6.3% (44/693) preferred to seek the doctor's opinion before stopping the course. Most participants (564/693, 81.4%) were aware that antibiotics are prescription-only drugs in Singapore, but were unable to correctly answer questions related to AMR, with 82.5% (572/693) not knowing what causes AMR, and 63.2% (438/693) believing AMR was not present in Singapore. Level of education ( $p<0.001$ ) and staying in larger housing ( $p=0.037$ )—the usual proxies for socio-economic status in Singapore—were independent factors associated with higher total knowledge scores. However, higher knowledge scores were not strongly related to participants' trust in primary care physicians (OR 1.08, 95%CI 0.97-1.20) or the

1  
2  
3 expectation of an antibiotic prescription for common viral infections (OR 0.98,  
4  
5 95%CI 0.96-1.0).  
6  
7  
8  
9

10 A large majority of the community continued to place trust in their primary care  
11  
12 doctors (Table S3). Most strikingly, 627 participants (627/693, 90.6%) trusted  
13  
14 healthcare professionals as their primary source of medical information, over the  
15  
16 Internet, media and family and friends. There were no significant associations  
17  
18 between demographic factors and attitude scores in contrast to the differences seen in  
19  
20 knowledge scores.  
21  
22  
23  
24  
25

26 In the two scenarios (of having an upper-respiratory tract infection or diarrhoea and  
27  
28 vomiting), although about half of the participants (294/693, 42.4% for cough and  
29  
30 runny nose, 414/693, 59.7% for diarrhoea and vomiting) envisioned visiting the  
31  
32 doctor for common complaints lasting less than 1 week, only 18.5% (average  
33  
34 128/693) expected an antibiotic prescription (Table S4). Were antibiotics not  
35  
36 prescribed during the initial visit, very few (average 39/693, 5.6%) reported they  
37  
38 would insist on antibiotic prescription or seek a second opinion. The only independent  
39  
40 factor associated with the expectation of an antibiotic prescription was younger age  
41  
42 (OR 0.98, 95%CI 0.97- 0.99) in multivariate logistic analysis. In dealing with leftover  
43  
44 antibiotics, the majority 68.7% (476/693) declared that they do not have leftovers  
45  
46 antibiotics; others reported keeping them for future use (60/693, 8.7%) or disposing  
47  
48 with solid waste (130/693, 18.8%) or down the drain (8/693, 1.2%). Only 3.3%  
49  
50 (23/693) admitted to having previously shared antibiotics with family members and  
51  
52 5.5% (38/693) to having taken leftover antibiotics from a previous illness.  
53  
54  
55  
56  
57  
58  
59  
60



### Asymptomatic carriage of ESBL-PE

Three hundred and five participants (305/693, 44.0%) provided rectal swabs or stool samples for microbiology cultures. The participants who provided stool samples were not significantly different from those who did not, in terms of age, gender and education level. Eighty participants (80/305, 26.2%, 95%CI: 21.5-31.6%) were found to carry at least one ceftriaxone non-susceptible *Enterobacteriaceae* isolate. One hundred and fifteen isolates were detected on the ESBL screening media, of which 93 were ceftriaxone resistant or intermediate *Enterobacteriaceae*. Six bacterial isolates were detected on the CRE screening media, none of which were confirmed to be carbapenemase-producing *Enterobacteriaceae*. The factors associated with ESBL-PE carriage from multivariate logistic regression analysis were residency overseas for more than 1 year (OR 3.3, 95%CI 1.6-6.9), with the most common location being other parts of Asia, scoring higher than 6 on the knowledge component in the questionnaire (OR 2.0 95%CI 1.03- 3.9) and having no left over antibiotics (OR 2.4, 95%CI 1.24-4.9). Interestingly, recent hospitalisation and reported antibiotic intake were not associated with ESBL-PE carriage (Table 2).

Table 2. Univariate analysis of demographic characteristics associated with carriage of ceftriaxone- resistant *Enterobacteriaceae*

| Factors            |           | Total<br>N=305   | Carriers<br>N=80 | Non-carriers<br>N=225 | p-<br>values |
|--------------------|-----------|------------------|------------------|-----------------------|--------------|
| Age (median, IQR*) |           | 54.0 (41.0-65.0) | 56.0 (38.8-66.0) | 54.0 (41.0-65.0)      | 0.79         |
| Females (%)        |           | 169 (55.4)       | 46 (57.5)        | 123 (54.7)            | 0.76         |
| Ethnicity (%)      | Chinese   | 237 (77.7)       | 67 (83.8)        | 170 (75.6)            | 0.24         |
|                    | Malay     | 28 (9.2)         | 3 (3.8)          | 25 (11.1)             |              |
|                    | Indian    | 30 (9.8)         | 7 (8.8)          | 23 (10.2)             |              |
|                    | Others    | 10 (3.3)         | 3 (3.8)          | 7 (3.1)               |              |
| Education (%)      | No formal | 11 (3.6)         | 4 (5.0)          | 7 (3.1)               | 0.45         |

|                                                                   |                                    |            |           |            |        |
|-------------------------------------------------------------------|------------------------------------|------------|-----------|------------|--------|
|                                                                   | education                          |            |           |            |        |
|                                                                   | Primary                            | 57 (18.7)  | 12 (15.0) | 45 (20.0)  |        |
|                                                                   | Secondary                          | 93 (30.5)  | 21 (26.2) | 72 (32.0)  |        |
|                                                                   | Tertiary                           | 110 (36.1) | 31 (38.8) | 79 (35.1)  |        |
|                                                                   | Graduate                           | 34 (11.1)  | 12 (15.0) | 22 (9.8)   |        |
| Housing (%)                                                       | HDB 1- and 2-room                  | 23 (7.5)   | 5 (6.2)   | 18 (8.0)   | 0.75   |
|                                                                   | HDB 3-room                         | 115 (37.7) | 32 (40.0) | 83 (36.9)  |        |
|                                                                   | HDB 4-room                         | 98 (32.1)  | 24 (30.0) | 74 (32.9)  |        |
|                                                                   | HDB 5-room and Executive Apartment | 47 (15.4)  | 11 (13.8) | 36 (16.0)  |        |
|                                                                   | Landed Property                    | 22 (7.2)   | 8 (10.0)  | 14 (6.2)   |        |
| Pets (%)                                                          |                                    | 33 (10.8)  | 7 (8.8)   | 26 (11.6)  | 0.75   |
| Number of occupants in the household (mean, sd)                   |                                    | 3.6 (1.6)  | 3.6 (1.6) | 3.6 (1.6)  | 0.71   |
| Stayed overseas for >1 year (%)                                   |                                    | 57 (18.7)  | 26 (32.5) | 31 (13.8)  | <0.001 |
| Stayed in South, East or Southeast Asia for >1 year (%)           |                                    | 40 (13.1)  | 18 (22.5) | 22 (9.8)   | 0.01   |
| Travelled in the past >1 year (%)                                 |                                    | 178 (58.4) | 47 (58.8) | 131 (58.2) | 1.0    |
| Travelled in South, East or Southeast Asia in the past 1 year (%) |                                    | 163 (53.4) | 43 (53.8) | 120 (53.3) | 1.0    |
| Any chronic illnesses (%)                                         |                                    | 127 (41.6) | 33 (41.2) | 94 (41.8)  | 1.0    |
| Hospitalisation in the past 1 year (%)                            |                                    | 43 (14.1)  | 14 (17.5) | 29 (12.9)  | 0.41   |
| Previous antibiotics intake (%)                                   |                                    | 282 (92.5) | 76 (95.0) | 206 (91.6) | 0.45   |
| Antibiotics in the last 6 months (%)                              |                                    | 85 (27.9)  | 23 (28.8) | 62 (27.6)  | 0.61   |
| Knowledge score >6 (%)                                            |                                    | 89 (29.2)  | 33 (41.3) | 56 (24.9)  | 0.01   |
| No left over antibiotics (%)                                      |                                    | 211 (69.2) | 63 (78.8) | 148 (65.8) | 0.04   |

\*IQR- interquartile range

Out of the 93 ceftriaxone-resistant isolates, 17 were cefoxitin resistant, suggestive of AmpC  $\beta$ -Lactamase production. Only one *Enterobacter cloacae* complex isolate was resistant to ertapenem and was of intermediate susceptibility to meropenem (Table 3). This *Enterobacter cloacae* complex isolate was not a carbapenemase-producer based

on phenotypic and genotypic tests. Eighty-three (83/93, 89.2%) of these ESBL-PE isolates were *E. coli*. The majority of ESBL-PE remained susceptible to aminoglycosides including gentamicin (80/93, 86.0%) and amikacin (91/93, 97.8%) as well as nitrofurantoin (76/93, 81.7%), while ciprofloxacin (53/93, 57.0%) and Sulfamethoxazole-trimethoprim (32/93, 34.4%) resistance were more common.

Table 3. Antibiotic susceptibility of the ceftriaxone-resistant isolates

|                               | <i>E coli</i> (N=83)<br>N (%) | <i>Klebsiella</i> (N=6)<br>N (%) | Others^ (N=4)<br>N (%) | Total (N=93)<br>N (%) |
|-------------------------------|-------------------------------|----------------------------------|------------------------|-----------------------|
| Piperacillin-tazobactam       | 73 (88.0)                     | 4 (66.7)                         | 1 (25.0)               | 78 (83.9)             |
| Cefepime                      | 35 (42.4)                     | 3 (50)                           | 2 (50.0)               | 40 (43.0)             |
| Aztreonam                     | 39 (47.0)                     | 2 (33.3)                         | 1 (25.0)               | 42 (45.2)             |
| Amikacin                      | 82 (98.8)                     | 5 (83.3)                         | 4 (100)                | 91 (97.8)             |
| Gentamicin                    | 75 (90.4)                     | 3 (50)                           | 2 (50.0)               | 80 (86.0)             |
| Nitrofurantoin                | 73 (88.0)                     | 2 (33.3)                         | 1 (25.0)               | 76 (81.7)             |
| Sulfamethoxazole-trimethoprim | 32 (38.6)                     | 0 (0)                            | 0 (0)                  | 32 (34.4)             |
| Ciprofloxacin                 | 48 (57.8)                     | 4 (66.7)                         | 1 (25.0)               | 53 (57.0)             |
| Fosfomycin                    | 63 (75.9)                     | 1 (16.7)                         | 0 (0)                  | 64 (68.8)             |
| Ertapenem                     | 83 (100)                      | 6 (100)                          | 3 (75.0)               | 92 (98.9)             |
| Meropenem                     | 83 (100)                      | 6 (100)                          | 3 (75.0)               | 92 (98.9)             |

^ Others include *Enterobacter* spp (2), *Proteus mirabilis* (1), *Raoultella ornithinolytica* (1)

### Molecular classification of ESBL-PE

Eighty (80/93, 85%) ESBL-PE isolates from unique participants underwent whole genome sequencing. When two or more isolates grew from a single subject's sample, *E. coli*, the commonest species observed, was selected to facilitate comparisons. Genotypic species determination from the sequence reads correlated completely with the results by MALDI-TOF MS or the Vitek-2 system. Seventy-one (71/80, 88.8%)

1  
2  
3 isolates were *E. coli*, of which the most common molecular type was sequence type  
4 (ST) 131 (11/71, 15.5%) (Table S5). The most frequently observed ESBL gene was  
5 CTX-M (62/80, 77.5%), especially CTX-M-15 (21/71, 29.6%) and CTX-M-27  
6 (16/71, 22.5%). *E. coli* ST131 were more resistant to fluoroquinolones than non-  
7 ST131 isolates ( $p=0.041$ ). The only significant factor from the questionnaire  
8 associated with ESBL-producing *E. coli* ST131 carriage was having more children in  
9 the household, but the difference was marginal (mean  $0.3\pm 0.7$  versus  $0.8 \pm 1.1$ ,  
10  $p=0.034$ ).  
11  
12  
13  
14  
15  
16  
17  
18  
19  
20  
21  
22  
23

## 24 DISCUSSION

25  
26 We found a significant burden of ESBL-PE carriage (80/305, 26.2%) among healthy  
27 community dwellers in Singapore, twice the rate found in an earlier study in 2014 of  
28 patients at an emergency department.[22] Similar rises have been observed  
29 globally.[3] Although these figures are lower than the reported prevalence of over  
30 40% fecal carriage with ESBL-PE elsewhere in South and South East Asia, they are  
31 much higher than the 1.5-3% observed in the US and UK.[3] Singapore has a tightly  
32 regulated antibiotic prescription system similar to Europe and the US where only  
33 registered medical practitioners are allowed to prescribe antibiotics, and they must be  
34 purchased from licensed dispensers. We did not find any association between fecal  
35 carriage of ESBL-PE and short-term travel, unlike other studies.[23] Singapore is a  
36 city-state and overseas travel is very common, making it hard to detect such a  
37 relationship when frequent trips to neighbouring countries are made. However, past  
38 residency overseas was strongly associated with colonisation, especially those who  
39 lived elsewhere in South or South East Asia (OR 3.3, 95%CI 1.6- 6.9). Distinctions  
40 should be made in future studies on overseas travels and AMR carriage in terms of  
41  
42  
43  
44  
45  
46  
47  
48  
49  
50  
51  
52  
53  
54  
55  
56  
57  
58  
59  
60

1  
2  
3 duration and frequency of travel, in addition to destinations. The possibility of  
4  
5 substantial acquisition of MDRO colonisation and infection through overseas  
6  
7 exposure[24,25] once again highlights the urgent need for a regional, collaborative  
8  
9 approach to tackling the problem of AMR.  
10  
11  
12  
13

14  
15 In addition, we did not find an association between recent antibiotic intake in the past  
16  
17 6 months and ESBL-PE carriage. This is inconsistent with previous reports showing  
18  
19 that consumption of certain classes of antibiotics such as beta-lactams and  
20  
21 fluoroquinolones are risk factors for predispositions to ESBL-PE carriage. [26,27]  
22  
23 The possible reasons could be due to the relatively small number of participants who  
24  
25 had recent antibiotic intake (85/305, 27.9%), so we were not able to distinguish the  
26  
27 specific classes of antibiotics taken by the participants. It is also possible that the  
28  
29 dominance of a hyperendemic community-associated clone rather than antibiotic  
30  
31 selection pressure alone contributed to this finding.  
32  
33  
34  
35  
36  
37

38  
39 Molecular typing of the ESBL-PE isolates from our cohort showed that *E. coli* ST131  
40  
41 with CTX-M beta-lactamases (11/71, 15.5%) were the most common ESBL  
42  
43 mechanism, echoing the global dissemination of this hyperendemic clone, especially  
44  
45 in the community.[28] Similar reports showed 11.1% (32/287) in China[29] and 4.1%  
46  
47 (8/193) in Thailand[30] have been published. The reason for the rapid worldwide  
48  
49 expansion and long-term persistence of *E. coli* ST131 is thought to be due to  
50  
51 compensatory mutations within the core genome counterbalancing the fitness cost  
52  
53 associated with IncF plasmids, thus sustaining its spread even in the absence of direct  
54  
55 antibiotic selection pressure.[31] These *E. coli* ST131 are not just prevalent colonisers  
56  
57 but have also associated with invasive bloodstream infections in hospitalized patients  
58  
59  
60

1  
2  
3 in Australia, New Zealand and Singapore.[32] It will be important to better  
4  
5 understand the evolutionary ecology and transmission dynamics of this emerging  
6  
7 clone.  
8  
9

10  
11  
12 This study also revealed widespread misconceptions about the utility of antibiotics for  
13  
14 viral infections, consistent with the findings of a global survey conducted by the  
15  
16 WHO in 2015.[33] We also found that, the public continues to place trust in their  
17  
18 primary care doctors and their recommendations. This dependence on physicians is in  
19  
20 contrast to doctors' perceptions of patient expectations for antibiotic  
21  
22 prescriptions.[34] This discordance has been previously described and is thought to be  
23  
24 due to the lack of empowerment of the patient and the erroneous attribution of patient  
25  
26 satisfaction to antibiotic prescription rather than a focus on better patient-doctor  
27  
28 communication.[35,36]  
29  
30  
31  
32  
33

34  
35 Engaging and educating both the prescribers and the public may reduce inappropriate  
36  
37 antibiotic use,[37,38] and has been identified as a key strategy by the WHO and the  
38  
39 UK to tackle AMR.[39,40] One of the most striking findings of this study is that  
40  
41 having both the knowledge that antibiotic courses should be completed and not  
42  
43 having left over antibiotics is independently associated with the carriage of ESBL-PE.  
44  
45 Though these relationships cannot be viewed as causal given the complexities in the  
46  
47 emergence and transmission of AMR, there is emerging evidence supporting short  
48  
49 course antibiotic therapies, even for severe infections such as bacteremia, given the  
50  
51 collateral damage that antibiotics have on host microbiome.[41] The current WHO  
52  
53 recommendation remains that full courses of antibiotics should be completed to  
54  
55 prevent the onset of resistance.[33] Similar messages are advocated in national  
56  
57  
58  
59  
60

1  
2  
3 campaigns launched in Australia,[42] the United States[43] and Europe.[44] Given  
4  
5 that the minimum effective treatment durations have not been determined for many  
6  
7 infections and that a significant proportion of antibiotic prescriptions are  
8  
9 inappropriate, the emphasis on completing the course of antibiotics to prevent  
10  
11 resistance may have to be re-examined.  
12  
13

14  
15  
16  
17 To our knowledge, this is the first study that explored antibiotic consumption  
18  
19 behavior with the acquisition of MDRO at a community level. This novel approach  
20  
21 has the potential to guide clinicians and policy makers in identifying directly  
22  
23 actionable interventions for the population. The main weakness of our study is that  
24  
25 the questionnaire data is self-reported and subjected to recall and interviewer biases.  
26  
27 We minimised these errors by designing specific questions that are carefully  
28  
29 constructed to maximize accuracy and completeness, and all interviewers were trained  
30  
31 to adhere to the question and answer format strictly. Further research using antibiotic  
32  
33 prescription databases can potentially overcome some of the intrinsic biases arising  
34  
35 from cross-sectional questionnaires.  
36  
37  
38  
39  
40  
41

## 42 **CONCLUSION**

43  
44 There is a significant burden of asymptomatic ESBL-PE colonisation in Singapore,  
45  
46 especially with *E. coli* ST131 carrying CTX-M. This is correlated with KAP of  
47  
48 antibiotic use, especially with the practice of finishing full courses of antibiotics, and  
49  
50 prolonged residency in other parts of Asia. Innovative approaches to control AMR  
51  
52 that take into account transboundary transmission of resistance and clinical trials to  
53  
54 determine the appropriate duration of antimicrobial therapy will be critical to control  
55  
56  
57  
58  
59  
60

1  
2  
3 the emergence of these resistant clones which have contributed significantly to the  
4  
5 current global antibiotic resistance crisis.  
6  
7  
8  
9

## 10 **CONTRIBUTOR AND GUARANTOR INFORMATION**

11  
12 YM, PAT, ARC, IS, PSPL, XLJK and KYMW conceptualised and designed the  
13  
14 study. IS, PSPL, XLJK and KYMW conducted the study and collected data. KKKK  
15  
16 performed microbiological testing. RTHO planned and conducted genomic  
17  
18 sequencing and interpreted the results. YM, ARC, IS, PSPL, XLJK and KYMW  
19  
20 performed data analysis. All participated in the writing of the script, and affirm that  
21  
22 the manuscript is an honest, accurate, and transparent account of the study being  
23  
24 reported; that no important aspects of the study have been omitted; and that any  
25  
26 discrepancies from the study as originally planned have been explained. YM and IS  
27  
28 accept full responsibility for the work and/or the conduct of the study, had access to  
29  
30 the data, and controlled the decision to publish. The corresponding author attests that  
31  
32 all listed authors meet authorship criteria and no others meeting the criteria have been  
33  
34 omitted.  
35  
36  
37  
38  
39  
40  
41

## 42 **ACKNOWLEDGEMENT**

43  
44 The authors thank the study team members, Ang Chen Xiang, Anne Goei Hui Yi,  
45  
46 Charmaine Loh Hui Yun, Cheong Shao Wei Dominic, Chew Shi Jie, Chong Yvette,  
47  
48 Choo Hui Min Charlotte, Choo Xin Yi, Daveraj Sivasegaran, Dean Krishen Sethi,  
49  
50 Joshua Tan Teck Chin, Keith Ching Wei Jie, Khoo Chun Yuet, Krystal Khoo Oon  
51  
52 Hui, Lai Jieru, Liew Yi Song Terence, Lim Li Liang Joshua, Lok Si Ying Andrea,  
53  
54 Lynette Sim Pei Shuen, Michelle Sim Yan Lin, Mok Charlene, Ong Yuxuan Daniel,  
55  
56 Ong Zheng Xuan, Quek Keng Liang, R Krishnapriya, Sophia Ng Shuen Yii, Tan Fang  
57  
58  
59  
60



1  
2  
3 Min Grace, Tan Jian Wei, Tan Pei Min Mabelleline, Tay Yiling Elaine, Tey Min Li,  
4  
5 Wu Yanlin, Zhou Lingyue, for their contributions in carrying out home visits,  
6  
7 interviews and sample collections.  
8  
9

## 10 11 12 **COPYRIGHT/LICENCE FOR PUBLICATION**

13  
14 The Corresponding Author has the right to grant on behalf of all authors and does  
15  
16 grant on behalf of all authors, a worldwide licence to the Publishers and its licensees  
17  
18 in the perpetuity, in all forms, formats and media (whether known now or created in  
19  
20 the future), to i) publish, reproduce, distribute display and store the Contribution, ii)  
21  
22 translate the Contribution into other languages, create adaptations, reprints, include  
23  
24 within collections and create summaries, extracts and/or, abstracts of the  
25  
26 Contribution, iii) create any other derivative work(s) based on the Contribution, iv) to  
27  
28 exploit all subsidiary rights in the Contribution, v) the inclusion of electronic links  
29  
30 from the Contribution to third party material where-ever it may be located; and, vi)  
31  
32 licence any third party to do any or all of the above.  
33  
34  
35  
36  
37  
38  
39

## 40 **FUNDING**

41  
42 Data collection was supported from funding from the Infectious Diseases Research  
43  
44 Fund, National University of Singapore (NUS), and the Saw Swee Hock School of  
45  
46 Public Health (SSHSPH). RTHO received funding support from the SSHSPH, NUS.  
47  
48 ARC was supported by the Singapore Population Health Improvement Centre.  
49  
50  
51

## 52 53 **COMPETING INTERESTS DECLARATION**

54  
55 All authors have completed the ICMJE uniform disclosure form at  
56  
57 [www.icmje.org/coi\\_disclosure.pdf](http://www.icmje.org/coi_disclosure.pdf) and declare: no financial relationships with any  
58  
59  
60

1  
2  
3 organisations that might have an interest in the submitted work in the previous three  
4  
5 years; no other relationships or activities that could appear to have influenced the  
6  
7 submitted work.  
8  
9

## 10 11 12 **DATA SHARING**

13  
14 The authors commit to making the relevant anonymised patient level data available on  
15  
16 reasonable request.  
17  
18

## 19 20 21 **REFERENCES**

- 22  
23  
24 1 Tacconelli E, Carrara E, Savoldi A, *et al.* Discovery, research, and  
25  
26 development of new antibiotics: the WHO priority list of antibiotic-resistant  
27  
28 bacteria and tuberculosis. *Lancet Infect Dis* 2018;**18**:318–27.  
29  
30 doi:10.1016/S1473-3099(17)30753-3  
31  
32  
33 2 Ruppé É, Woerther P-L, Barbier F. Mechanisms of antimicrobial resistance in  
34  
35 Gram-negative bacilli. *Ann Intensive Care* 2015;**5**:61. doi:10.1186/s13613-015-  
36  
37 0061-0  
38  
39  
40 3 Karanika S, Karantanos T, Arvanitis M, *et al.* Fecal Colonization With  
41  
42 Extended-spectrum Beta-lactamase–Producing *Enterobacteriaceae* and Risk  
43  
44 Factors Among Healthy Individuals: A Systematic Review and Metaanalysis.  
45  
46 *Clin Infect Dis* 2016;**63**:310–8. doi:10.1093/cid/ciw283  
47  
48  
49 4 Reddy P, Malczynski M, Obias A, *et al.* Screening for Extended-Spectrum -  
50  
51 Lactamase-Producing *Enterobacteriaceae* among High-Risk Patients and Rates  
52  
53 of Subsequent Bacteremia. *Clin Infect Dis* 2007;**45**:846–52.  
54  
55 doi:10.1086/521260  
56  
57  
58 5 Troché G, Toly L-M, Guibert M, *et al.* Detection and Treatment of Antibiotic-  
59  
60

- 1  
2  
3 Resistant Bacterial Carriage in a Surgical Intensive Care Unit: A 6-Year  
4 Prospective Survey. *Infect Control Hosp Epidemiol* 2005;**26**:161–5.  
5  
6 doi:10.1086/502521  
7  
8  
9  
10 6 Coker RJ, Hunter BM, Rudge JW, *et al.* Emerging infectious diseases in  
11 southeast Asia: regional challenges to control. *Lancet* 2011;**377**:599–609.  
12  
13 doi:10.1016/S0140-6736(10)62004-1  
14  
15  
16  
17 7 Zellweger RM, Carrique-Mas J, Limmathurotsakul D, *et al.* A current  
18 perspective on antimicrobial resistance in Southeast Asia. *J Antimicrob*  
19  
20  
21  
22  
23  
24  
25 8 Singapore Department of Statistics. Singapore Residents by Planning  
26 Area/Subzone, 2015. 2015.  
27  
28  
29 9 Pan DST, Huang JH, Lee MHM, *et al.* Knowledge, attitudes and practices  
30 towards antibiotic use in upper respiratory tract infections among patients  
31 seeking primary health care in Singapore. *BMC Fam Pract* 2016;**17**:148.  
32  
33  
34  
35  
36  
37  
38 10 Scaioli G, Gualano MR, Gili R, *et al.* Antibiotic Use: A Cross-Sectional  
39 Survey Assessing the Knowledge, Attitudes and Practices amongst Students of  
40 a School of Medicine in Italy. *PLoS One* 2015;**10**:e0122476.  
41  
42  
43  
44  
45  
46  
47  
48  
49  
50  
51  
52  
53  
54 11 Awad AI, Aboud EA. Knowledge, attitude and practice towards antibiotic use  
55 among the public in Kuwait. *PLoS One* 2015;**10**:e0117910.  
56  
57  
58  
59  
60  
61  
62  
63  
64  
65  
66  
67  
68  
69  
70  
71  
72  
73  
74  
75  
76  
77  
78  
79  
80  
81  
82  
83  
84  
85  
86  
87  
88  
89  
90  
91  
92  
93  
94  
95  
96  
97  
98  
99  
100  
101  
102  
103  
104  
105  
106  
107  
108  
109  
110  
111  
112  
113  
114  
115  
116  
117  
118  
119  
120  
121  
122  
123  
124  
125  
126  
127  
128  
129  
130  
131  
132  
133  
134  
135  
136  
137  
138  
139  
140  
141  
142  
143  
144  
145  
146  
147  
148  
149  
150  
151  
152  
153  
154  
155  
156  
157  
158  
159  
160  
161  
162  
163  
164  
165  
166  
167  
168  
169  
170  
171  
172  
173  
174  
175  
176  
177  
178  
179  
180  
181  
182  
183  
184  
185  
186  
187  
188  
189  
190  
191  
192  
193  
194  
195  
196  
197  
198  
199  
200  
201  
202  
203  
204  
205  
206  
207  
208  
209  
210  
211  
212  
213  
214  
215  
216  
217  
218  
219  
220  
221  
222  
223  
224  
225  
226  
227  
228  
229  
230  
231  
232  
233  
234  
235  
236  
237  
238  
239  
240  
241  
242  
243  
244  
245  
246  
247  
248  
249  
250  
251  
252  
253  
254  
255  
256  
257  
258  
259  
260  
261  
262  
263  
264  
265  
266  
267  
268  
269  
270  
271  
272  
273  
274  
275  
276  
277  
278  
279  
280  
281  
282  
283  
284  
285  
286  
287  
288  
289  
290  
291  
292  
293  
294  
295  
296  
297  
298  
299  
300  
301  
302  
303  
304  
305  
306  
307  
308  
309  
310  
311  
312  
313  
314  
315  
316  
317  
318  
319  
320  
321  
322  
323  
324  
325  
326  
327  
328  
329  
330  
331  
332  
333  
334  
335  
336  
337  
338  
339  
340  
341  
342  
343  
344  
345  
346  
347  
348  
349  
350  
351  
352  
353  
354  
355  
356  
357  
358  
359  
360  
361  
362  
363  
364  
365  
366  
367  
368  
369  
370  
371  
372  
373  
374  
375  
376  
377  
378  
379  
380  
381  
382  
383  
384  
385  
386  
387  
388  
389  
390  
391  
392  
393  
394  
395  
396  
397  
398  
399  
400  
401  
402  
403  
404  
405  
406  
407  
408  
409  
410  
411  
412  
413  
414  
415  
416  
417  
418  
419  
420  
421  
422  
423  
424  
425  
426  
427  
428  
429  
430  
431  
432  
433  
434  
435  
436  
437  
438  
439  
440  
441  
442  
443  
444  
445  
446  
447  
448  
449  
450  
451  
452  
453  
454  
455  
456  
457  
458  
459  
460  
461  
462  
463  
464  
465  
466  
467  
468  
469  
470  
471  
472  
473  
474  
475  
476  
477  
478  
479  
480  
481  
482  
483  
484  
485  
486  
487  
488  
489  
490  
491  
492  
493  
494  
495  
496  
497  
498  
499  
500  
501  
502  
503  
504  
505  
506  
507  
508  
509  
510  
511  
512  
513  
514  
515  
516  
517  
518  
519  
520  
521  
522  
523  
524  
525  
526  
527  
528  
529  
530  
531  
532  
533  
534  
535  
536  
537  
538  
539  
540  
541  
542  
543  
544  
545  
546  
547  
548  
549  
550  
551  
552  
553  
554  
555  
556  
557  
558  
559  
560  
561  
562  
563  
564  
565  
566  
567  
568  
569  
570  
571  
572  
573  
574  
575  
576  
577  
578  
579  
580  
581  
582  
583  
584  
585  
586  
587  
588  
589  
590  
591  
592  
593  
594  
595  
596  
597  
598  
599  
600  
601  
602  
603  
604  
605  
606  
607  
608  
609  
610  
611  
612  
613  
614  
615  
616  
617  
618  
619  
620  
621  
622  
623  
624  
625  
626  
627  
628  
629  
630  
631  
632  
633  
634  
635  
636  
637  
638  
639  
640  
641  
642  
643  
644  
645  
646  
647  
648  
649  
650  
651  
652  
653  
654  
655  
656  
657  
658  
659  
660  
661  
662  
663  
664  
665  
666  
667  
668  
669  
670  
671  
672  
673  
674  
675  
676  
677  
678  
679  
680  
681  
682  
683  
684  
685  
686  
687  
688  
689  
690  
691  
692  
693  
694  
695  
696  
697  
698  
699  
700  
701  
702  
703  
704  
705  
706  
707  
708  
709  
710  
711  
712  
713  
714  
715  
716  
717  
718  
719  
720  
721  
722  
723  
724  
725  
726  
727  
728  
729  
730  
731  
732  
733  
734  
735  
736  
737  
738  
739  
740  
741  
742  
743  
744  
745  
746  
747  
748  
749  
750  
751  
752  
753  
754  
755  
756  
757  
758  
759  
760  
761  
762  
763  
764  
765  
766  
767  
768  
769  
770  
771  
772  
773  
774  
775  
776  
777  
778  
779  
780  
781  
782  
783  
784  
785  
786  
787  
788  
789  
790  
791  
792  
793  
794  
795  
796  
797  
798  
799  
800  
801  
802  
803  
804  
805  
806  
807  
808  
809  
810  
811  
812  
813  
814  
815  
816  
817  
818  
819  
820  
821  
822  
823  
824  
825  
826  
827  
828  
829  
830  
831  
832  
833  
834  
835  
836  
837  
838  
839  
840  
841  
842  
843  
844  
845  
846  
847  
848  
849  
850  
851  
852  
853  
854  
855  
856  
857  
858  
859  
860  
861  
862  
863  
864  
865  
866  
867  
868  
869  
870  
871  
872  
873  
874  
875  
876  
877  
878  
879  
880  
881  
882  
883  
884  
885  
886  
887  
888  
889  
890  
891  
892  
893  
894  
895  
896  
897  
898  
899  
900  
901  
902  
903  
904  
905  
906  
907  
908  
909  
910  
911  
912  
913  
914  
915  
916  
917  
918  
919  
920  
921  
922  
923  
924  
925  
926  
927  
928  
929  
930  
931  
932  
933  
934  
935  
936  
937  
938  
939  
940  
941  
942  
943  
944  
945  
946  
947  
948  
949  
950  
951  
952  
953  
954  
955  
956  
957  
958  
959  
960  
961  
962  
963  
964  
965  
966  
967  
968  
969  
970  
971  
972  
973  
974  
975  
976  
977  
978  
979  
980  
981  
982  
983  
984  
985  
986  
987  
988  
989  
990  
991  
992  
993  
994  
995  
996  
997  
998  
999  
1000

- 1  
2  
3 13 Lv B, Zhou Z, Xu G, *et al.* Knowledge, attitudes and practices concerning self-  
4 medication with antibiotics among university students in western China. *Trop*  
5 *Med Int Heal* 2014;**19**:769–79. doi:10.1111/tmi.12322  
6  
7  
8  
9  
10 14 Teck KC, Ghazi HF, Bin Ahmad MI, *et al.* Knowledge, Attitude, and Practice  
11 of Parents Regarding Antibiotic Usage in Treating Children’s Upper  
12 Respiratory Tract Infection at Primary Health Clinic in Kuala Lumpur,  
13 Malaysia. *Heal Serv Res Manag Epidemiol* 2016;**3**:233339281664372.  
14 doi:10.1177/2333392816643720  
15  
16  
17  
18  
19 15 Hall MA, Zheng B, Dugan E, *et al.* Measuring Patients’ Trust in their Primary  
20 Care Providers. *Med Care Res Rev* 2002;**59**:293–318.  
21 doi:10.1177/1077558702059003004  
22  
23  
24  
25  
26  
27  
28 16 Performance Standards for Antimicrobial Susceptibility Testing An  
29 informational supplement for global application developed through the Clinical  
30 and Laboratory Standards Institute.  
31 <http://ljzx.cqrmhospital.com/upfiles/201601/20160112155335884.pdf>  
32 (accessed 12 Apr 2018).  
33  
34  
35  
36  
37  
38  
39 17 Bankevich A, Nurk S, Antipov D, *et al.* SPAdes: a new genome assembly  
40 algorithm and its applications to single-cell sequencing. *J Comput Biol*  
41 2012;**19**:455–77. doi:10.1089/cmb.2012.0021  
42  
43  
44  
45  
46  
47 18 Wood DE, Salzberg SL. Kraken: ultrafast metagenomic sequence classification  
48 using exact alignments. *Genome Biol* 2014;**15**:R46. doi:10.1186/gb-2014-15-3-  
49 r46  
50  
51  
52  
53 19 Madden T. Chapter 16. The BLAST Sequence Analysis Tool.  
54 [https://www.ncbi.nlm.nih.gov/books/NBK21097/pdf/Bookshelf\\_NBK21097.p](https://www.ncbi.nlm.nih.gov/books/NBK21097/pdf/Bookshelf_NBK21097.pdf)  
55 [df](https://www.ncbi.nlm.nih.gov/books/NBK21097/pdf/Bookshelf_NBK21097.pdf) (accessed 20 Apr 2018).  
56  
57  
58  
59  
60

- 1  
2  
3  
4  
5  
6  
7  
8  
9  
10  
11  
12  
13  
14  
15  
16  
17  
18  
19  
20  
21  
22  
23  
24  
25  
26  
27  
28  
29  
30  
31  
32  
33  
34  
35  
36  
37  
38  
39  
40  
41  
42  
43  
44  
45  
46  
47  
48  
49  
50  
51  
52  
53  
54  
55  
56  
57  
58  
59  
60
- 20 Inouye M, Dashnow H, Raven L-A, *et al.* SRST2: Rapid genomic surveillance for public health and hospital microbiology labs. *Genome Med* 2014;**6**:90. doi:10.1186/s13073-014-0090-6
- 21 R Core Team. A language and environment for statistical computing. 2017.
- 22 Young BE, Lye DC, Krishnan P, *et al.* A prospective observational study of the prevalence and risk factors for colonization by antibiotic resistant bacteria in patients at admission to hospital in Singapore. *BMC Infect Dis* 2014;**14**:298. doi:10.1186/1471-2334-14-298
- 23 McNulty CAM, Lecky DM, Xu-McCrae L, *et al.* CTX-M ESBL-producing Enterobacteriaceae: estimated prevalence in adults in England in 2014. *J Antimicrob Chemother* Published Online First: 5 March 2018. doi:10.1093/jac/dky007
- 24 Tängdén T, Cars O, Melhus A, *et al.* Foreign travel is a major risk factor for colonization with *Escherichia coli* producing CTX-M-type extended-spectrum beta-lactamases: a prospective study with Swedish volunteers. *Antimicrob Agents Chemother* 2010;**54**:3564–8. doi:10.1128/AAC.00220-10
- 25 Woerther P-L, Andremont A, Kantele A. Travel-acquired ESBL-producing Enterobacteriaceae: impact of colonization at individual and community level. *J Travel Med* 2017;**24**:S29–34. doi:10.1093/jtm/taw101
- 26 Augustine MR, Testerman TL, Justo JA, *et al.* Clinical Risk Score for Prediction of Extended-Spectrum  $\beta$ -Lactamase-Producing Enterobacteriaceae in Bloodstream Isolates. *Infect Control Hosp Epidemiol* 2017;**38**:266–72. doi:10.1017/ice.2016.292
- 27 Tumbarello M, Treccarichi EM, Bassetti M, *et al.* Identifying Patients Harboring Extended-Spectrum- $\beta$ -Lactamase-Producing Enterobacteriaceae on

- 1  
2  
3 Hospital Admission: Derivation and Validation of a Scoring System.  
4  
5 *Antimicrob Agents Chemother* 2011;**55**:3485–90. doi:10.1128/AAC.00009-11  
6  
7  
8 28 Dautzenberg MJD, Haverkate MR, Bonten MJM, *et al.* Epidemic potential of  
9  
10 Escherichia coli ST131 and Klebsiella pneumoniae ST258: a systematic review  
11  
12 and meta-analysis. *BMJ Open* 2016;**6**:e009971. doi:10.1136/bmjopen-2015-  
13  
14 009971  
15  
16  
17 29 Zhong Y-M, Liu W-E, Liang X-H, *et al.* Emergence and spread of O16-ST131  
18  
19 and O25b-ST131 clones among faecal CTX-M-producing Escherichia coli in  
20  
21 healthy individuals in Hunan Province, China. *J Antimicrob Chemother*  
22  
23 2015;**70**:2223–7. doi:10.1093/jac/dkv114  
24  
25  
26 30 Niumsup PR, Tansawai U, Na-udom A, *et al.* Prevalence and risk factors for  
27  
28 intestinal carriage of CTX-M-type ESBLs in Enterobacteriaceae from a Thai  
29  
30 community. *Eur J Clin Microbiol Infect Dis* 2018;**37**:69–75.  
31  
32 doi:10.1007/s10096-017-3102-9  
33  
34  
35 31 Pitout JDD, DeVinney R. Escherichia coliST131: a multidrug-resistant clone  
36  
37 primed for global domination. *F1000Research* 2017;**6**.  
38  
39 doi:10.12688/f1000research.10609.1  
40  
41  
42 32 Harris PNA, Ben Zakour NL, Roberts LW, *et al.* Whole genome analysis of  
43  
44 cephalosporin-resistant Escherichia coli from bloodstream infections in  
45  
46 Australia, New Zealand and Singapore: high prevalence of CMY-2 producers  
47  
48 and ST131 carrying blaCTX-M-15 and blaCTX-M-27. *J Antimicrob*  
49  
50 *Chemother* 2018;**73**:634–42. doi:10.1093/jac/dkx466  
51  
52  
53 33 Antibiotic resistance: Multi-country public awareness survey. World Heal.  
54  
55 Organ.  
56  
57 2016.<http://www.who.int/drugresistance/documents/baselinesurveynov2015/en>  
58  
59  
60

- 1  
2  
3 / (accessed 25 Mar 2018).  
4  
5  
6 34 Lee T-H, Wong JG, Lye DC, *et al.* Medical and psychosocial factors associated  
7 with antibiotic prescribing in primary care: survey questionnaire and factor  
8 analysis. *Br J Gen Pract* 2017;**67**:e168–77. doi:10.3399/bjgp17X688885  
9  
10  
11  
12 35 Welschen I, Kuyvenhoven M, Hoes A, *et al.* Antibiotics for acute respiratory  
13 tract symptoms: patients' expectations, GPs' management and patient  
14 satisfaction. *Fam Pract*; **21**. doi:10.1093/fampra/cmh303  
15  
16  
17  
18 36 Davey P, Pagliari C, Hayes A. The patient's role in the spread and control of  
19 bacterial resistance to antibiotics. *Clin Microbiol Infect* 2002;**8**:43–68.  
20  
21  
22  
23  
24  
25  
26  
27 37 McNulty CAM, Cookson BD, Lewis MAO. Education of healthcare  
28 professionals and the public. *J Antimicrob Chemother* 2012;**67**:i11–8.  
29  
30  
31  
32  
33  
34 38 Little P, Stuart B, Francis N, *et al.* Effects of internet-based training on  
35 antibiotic prescribing rates for acute respiratory-tract infections: a  
36 multinational, cluster, randomised, factorial, controlled trial. *Lancet*  
37  
38  
39  
40  
41  
42  
43 39 UK Five Year Antimicrobial Resistance Strategy 2013 to 2018.  
44  
45  
46  
47  
48  
49  
50  
51  
52 40 WHO Global Strategy for Containment of Antimicrobial Resistance WHO  
53  
54  
55  
56  
57  
58  
59  
60

- 1  
2  
3 41 Llewelyn MJ, Fitzpatrick JM, Darwin E, *et al.* The antibiotic course has had its  
4 day. *BMJ* 2017;;j3418. doi:10.1136/bmj.j3418  
5  
6  
7  
8 42 Antibiotics and antibiotic resistance. NPS MedicineWise.  
9  
10 2018.[https://www.nps.org.au/medical-info/consumer-info/antibiotic-resistance-](https://www.nps.org.au/medical-info/consumer-info/antibiotic-resistance-the-facts)  
11 [the-facts](https://www.nps.org.au/medical-info/consumer-info/antibiotic-resistance-the-facts) (accessed 10 Apr 2018).  
12  
13  
14 43 Consumer Updates - Combating Antibiotic Resistance.  
15  
16 2018.<https://www.fda.gov/ForConsumers/ConsumerUpdates/ucm092810.htm>  
17  
18 (accessed 10 Apr 2018).  
19  
20  
21 44 Factsheet for the general public - Antimicrobial resistance.  
22  
23 [https://ecdc.europa.eu/en/antimicrobial-resistance/facts/factsheets/general-](https://ecdc.europa.eu/en/antimicrobial-resistance/facts/factsheets/general-public)  
24 [public](https://ecdc.europa.eu/en/antimicrobial-resistance/facts/factsheets/general-public) (accessed 10 Apr 2018).  
25  
26  
27  
28  
29  
30  
31  
32  
33  
34  
35  
36  
37  
38  
39  
40  
41  
42  
43  
44  
45  
46  
47  
48  
49  
50  
51  
52  
53  
54  
55  
56  
57  
58  
59  
60



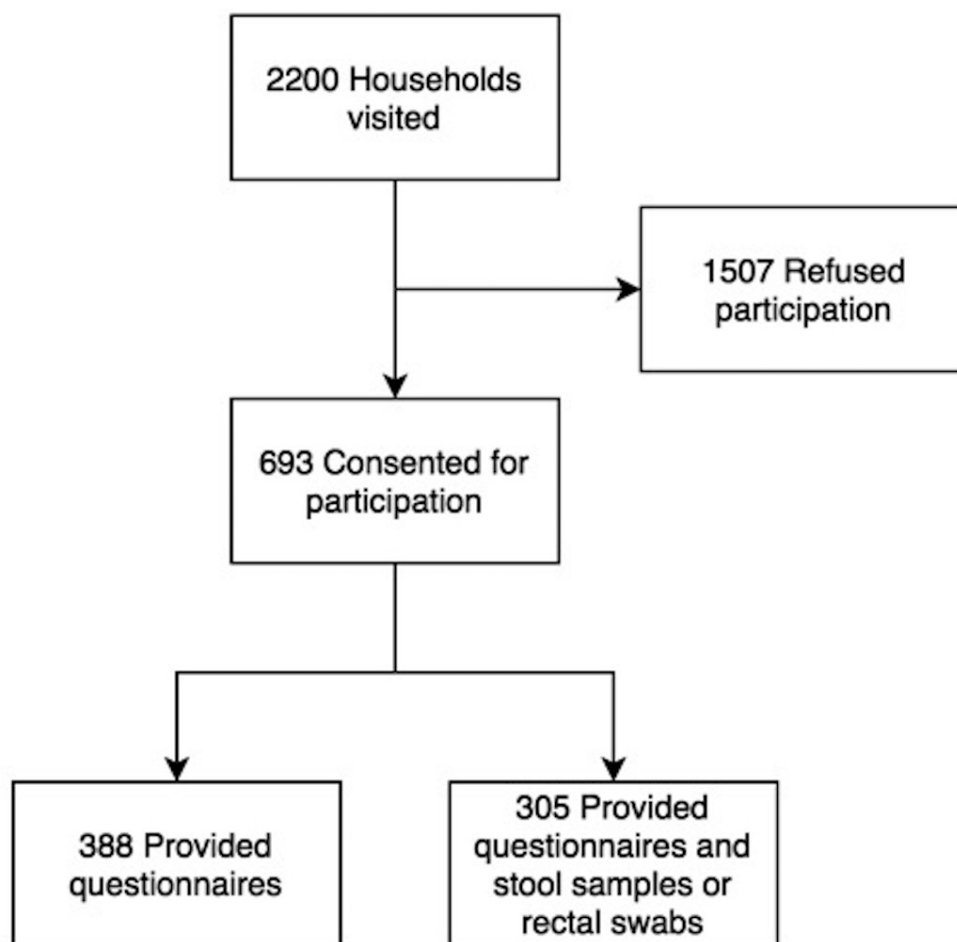

Figure S1. Participant recruitment flowchart

90x87mm (300 x 300 DPI)

Table S1. Study questionnaire

## Section 1: Background Data

1. Demographic Data
  - 1.1 Age
  - 1.2 Gender - Male or Female
2. Race - Chinese or Malay or Indian or Others
3. Educational Background
  - 2.1 Highest Education Level Attained- Primary Education or Secondary Education or Tertiary Education or Graduate Education or No formal education
4. Have you ever studied a healthcare-related course? (Medicine, Traditional Chinese Medicine, Therapy, Nursing) - Yes or No
- 3 Occupation and Financial Status
5. Occupation:
  - 4 Accommodation
    - 4.1 Housing type- Public housing (1-Room or 2-Room or 3-Room or 4-Room or 5-Room or Executive Apartment) or Landed property
    - 4.2 How many occupants are there living in your house? (including you) Number of Occupants:
      - 4.3.1 How many people in the household are in the following age group? Less than 12 years old:
      - 4.3.2 How many people in the household are in the following age group? More than 65 years old:
6. Do you currently have any dogs or cats at home? - Yes or No
- 5 Travel history

1  
2  
3 5.3 Have you travelled to the following places within the past 6 months? – Yes or

4  
5 No

6  
7  
8 5.3.1 If yes, which of the following places have you been to? (You may select more  
9  
10 than 1 option) - Southeast Asia (Malaysia, Thailand, Indonesia, Vietnam,  
11  
12 Cambodia etc) and/ or South Asia (India, Bangladesh, Sri Lanka) and/ or East  
13  
14 Asia (China, Korea, Japan) and/ or Europe and/ or South America and/ or  
15  
16 North America and/ or Middle East or Others:

17  
18  
19 5.4 Have you lived anywhere else for more than 1 year? – Yes or No

20  
21  
22 6 If yes, did you live in the following areas? (You may select more than 1 option) -  
23  
24 Southeast Asia (Malaysia, Thailand, Indonesia, Vietnam, Cambodia etc) and/ or  
25  
26 South Asia (India, Bangladesh, Sri Lanka) and/ or East Asia (China, Korea,  
27  
28 Japan) and/ or Europe and/ or South America and/ or North America and/ or  
29  
30 Middle East or Others:

31  
32  
33 7 Medical History

34  
35 6.1 Do you have any of the following? (You can choose more than one of the  
36  
37 following) - Diabetes Mellitus and/ or Medications (Chemotherapy, Steroids,  
38  
39 Immunosuppressants etc) and/ or Other medical conditions or None of the above

40  
41  
42 6.2 When was your last hospitalisation? - Never been hospitalised before or  
43  
44 Hospitalised before

45  
46  
47 6.2.1 If yes, was this hospitalisation within the past 1 year? – Yes or No

48  
49 6.2.2 How long was your stay? Duration:

50  
51  
52 6.3 Have you used antibiotics before? - Have never used antibiotics before or Used  
53  
54 antibiotics before

55  
56 6.3.1 If yes, when was the last time you started on antibiotics? - Within the last 6  
57  
58  
59  
60

months or More than 6 months ago

## Section 2: Assessment of Antibiotic Practices

### 1. Assessing Health-Seeking and Antibiotic-Seeking Behaviours

#### Scenario 1: Cough and Runny Nose

1.1.1 Would you go to the doctor for a cough and runny nose that lasted less than 1 week? – Yes or No or I am not sure

1.1.2 In the above scenario, did you expect the doctor to prescribe antibiotics to help with the recovery? – Yes or No or I am not sure

1.1.3 If the doctor you were seeing does not prescribe you antibiotics for the symptoms above, would you seek another doctor's opinion or firmly request the doctor for an antibiotic prescription? – Yes or No or I am not sure

#### Scenario 2: Diarrhoea and Vomiting

1.2.1 Would you go to the doctor for diarrhoea, vomiting and stomach pain that lasted less than a week? – Yes or No or I am not sure

1.2.2 In the above scenario, did you expect the doctor to prescribe antibiotics to help with the recovery? – Yes or No or I am not sure

1.2.3 If the doctor you were seeing does not prescribe you antibiotics for the symptoms above, would you seek another doctor's opinion or firmly request the doctor for an antibiotic prescription? – Yes or No or I am not sure

### 2. Assessing Practices of Disposal and Storage of Antibiotics

2.1 What do you usually do with leftover antibiotics? - Usually do not have leftovers

1  
2  
3 or Keep it for future use or Pour it down a sink or toilet bowl or Disposal in the  
4 rubbish bin or Others:  
5  
6  
7

8  
9 **3. Assessing Alternative Antibiotic Practices**

10  
11 3.1 Have you ever shared antibiotics with someone else? – Yes or No  
12

13  
14 3.2 Have you ever taken leftover antibiotics from a previous course of illness? – Yes  
15  
16 or No  
17  
18  
19

20  
21  
22 **Section 3: Attitude Assessment**

23  
24  
25 **1. Attitudes Towards Healthcare Provider Prescription**

26  
27 1.1 Sometimes my doctor prioritises what is beneficial for him over my medical  
28 needs. – Strongly agree or Agree or Neutral or Disagree or Strongly Disagree  
29

30  
31 1.2 My doctor's medical skills are not as good as they should be. – Strongly agree or  
32 Agree or Neutral or Disagree or Strongly Disagree  
33  
34

35  
36 1.3 My doctor is always honest when telling me about all the available treatments for  
37 my condition. – Strongly agree or Agree or Neutral or Disagree or Strongly  
38 Disagree  
39  
40  
41

42  
43 1.4 I have no worries about putting my life in my doctor's hands. – Strongly agree or  
44 Agree or Neutral or Disagree or Strongly Disagree  
45  
46  
47

48  
49 **2. Attitudes Towards Potential Educational Interventions**

50  
51 2.1 Which of the following sources of medical information do you trust most? -

52  
53 Healthcare Professionals' Advice (Doctors, nurses, clinical assistants, therapists)  
54  
55 or Family and Friends or Online Medical Sources or Television Programmes and  
56  
57 Advertisements or Radio Programmes and Advertisements  
58  
59  
60

## Section 4: Knowledge Assessment

## 1. Knowledge on Function of Antibiotics

1.1 Antibiotics are medicines that can treat viral infections. – True or False or I am not sure

1.2 Antibiotics are medicines that can treat bacterial infections. – True or False or I am not sure

1.3 Antibiotics are medicines that can treat fungal infections. – True or False or I am not sure

## 2. Knowledge on Agents of Infection

2.1 Which of the following most commonly causes running nose and cough? – Virues or Bacteria or I am not sure

2.2 Which of the following most commonly causes diarrhoea? – Virues or Bacteria or I am not sure

## 3. Knowledge on Proper Use of Antibiotics

3.1 Antibiotics can be obtained at the pharmacist without any prescription. - True or False or I am not sure

3.2 Antibiotics can be stopped when: - You start to feel better or You finish the entire course or You head back to the doctor and he tells you that you can stop

## 4. Knowledge on Concept of Antibiotic Resistance

4.1 Do you understand what is antibiotic resistance? – Yes or No or I am unsure

4.1.1 If yes, describe what causes antibiotic resistance?

4.2 Which of the following is a consequence of antibiotic resistance? (choose only ONE option) - Antibiotics become more effective at treating infections or Antibiotics become less effective at treating infections or Your body immunity

1  
2  
3 becomes weaker or Your body immunity becomes stronger  
4

5 4.3 Antimicrobial resistance is not present in Singapore yet. – Yes or No or I am  
6

7  
8 unsure  
9  
10  
11  
12  
13  
14  
15  
16  
17  
18  
19  
20  
21  
22  
23  
24  
25  
26  
27  
28  
29  
30  
31  
32  
33  
34  
35  
36  
37  
38  
39  
40  
41  
42  
43  
44  
45  
46  
47  
48  
49  
50  
51  
52  
53  
54  
55  
56  
57  
58  
59  
60

For peer review only

Table S2. Assessment of knowledge

| Questions |                                                                         |                              | N (%)        |
|-----------|-------------------------------------------------------------------------|------------------------------|--------------|
|           |                                                                         |                              | Total N= 693 |
| 2.1.1     | Antibiotics are medicines that can treat viral infections.              | False                        | 149 (21.5%)  |
|           |                                                                         | True                         | 335 (48.3%)  |
|           |                                                                         | Unsure                       | 209 (30.2%)  |
| 2.1.2     | Antibiotics are medicines that can treat bacterial infections.          | True                         | 419 (60.5%)  |
|           |                                                                         | False                        | 50 (7.2%)    |
|           |                                                                         | Unsure                       | 224 (32.3%)  |
| 2.1.3     | Antibiotics are medicines that can treat fungal infections.             | False                        | 157 (22.7%)  |
|           |                                                                         | True                         | 194 (28.0%)  |
|           |                                                                         | Unsure                       | 342 (49.4%)  |
| 2.1.4     | Which of the following most commonly causes running nose and cough.     | Viruses                      | 352 (50.8%)  |
|           |                                                                         | Bacteria                     | 130 (18.8%)  |
|           |                                                                         | Unsure                       | 211 (30.4%)  |
| 2.1.5     | Which of the following most commonly causes diarrhoea?                  | Viruses                      | 98 (14.1%)   |
|           |                                                                         | Bacteria                     | 385 (55.6%)  |
|           |                                                                         | Unsure                       | 210 (30.3%)  |
| 2.1.6     | Antibiotics can be stopped when...                                      | You finish the entire course | 554 (79.9%)  |
|           |                                                                         | When you feel better         | 95 (13.7%)   |
|           |                                                                         | Consult the doctor           | 44 (6.3%)    |
| 2.1.7     | Antibiotics can be obtained at the pharmacist without any prescription. | False                        | 564 (81.4%)  |
|           |                                                                         | True                         | 29 (4.2%)    |
|           |                                                                         | Unsure                       | 100 (14.4%)  |



|        |                                                                   |                                                            |             |
|--------|-------------------------------------------------------------------|------------------------------------------------------------|-------------|
| 2.1.8  | What causes antimicrobial resistance?<br>(Open ended)             | Inappropriate use of antibiotics                           | 121 (17.5%) |
|        |                                                                   | Wrong or unsure                                            | 572 (82.5%) |
| 2.1.9  | Which of the following is a consequence of antibiotic resistance? | Antibiotics becoming more effective at treating infections | 280 (40.4%) |
|        |                                                                   | Antibiotics becoming less effective at treating infections | 111 (16.0%) |
|        |                                                                   | Your body immunity becomes weaker                          | 235 (33.9%) |
|        |                                                                   | Your body immunity becomes stronger                        | 67 (9.7%)   |
| 2.1.10 | Antibiotic resistance is not present in Singapore yet.            | False                                                      | 255 (36.8%) |
|        |                                                                   | True                                                       | 77 (11.1%)  |
|        |                                                                   | Unsure                                                     | 361 (52.1%) |

Table S3. Assessment of attitude toward primary care

| Questions |                                                                                                |                                  | N (%)      |
|-----------|------------------------------------------------------------------------------------------------|----------------------------------|------------|
|           |                                                                                                |                                  | N= 693     |
| 2.2.1     | Sometimes my doctor prioritises what is beneficial for him over my medical needs               | Strongly agree                   | 14 (2.0)   |
|           |                                                                                                | Agree                            | 109 (15.7) |
|           |                                                                                                | Neutral                          | 145 (20.9) |
|           |                                                                                                | Disagree                         | 335 (48.3) |
|           |                                                                                                | Strongly disagree                | 90 (13.0)  |
| 2.2.2     | My doctor's medical skills are not as good as they should be                                   | Strongly agree                   | 10 (1.4)   |
|           |                                                                                                | Agree                            | 83 (12.0)  |
|           |                                                                                                | Neutral                          | 150 (21.6) |
|           |                                                                                                | Disagree                         | 373 (53.8) |
|           |                                                                                                | Strongly disagree                | 77 (11.1)  |
| 2.2.3     | My doctor is always honest when telling me about all the available treatments for my condition | Strongly agree                   | 100 (14.4) |
|           |                                                                                                | Agree                            | 427 (61.6) |
|           |                                                                                                | Neutral                          | 115 (16.6) |
|           |                                                                                                | Disagree                         | 45 (6.5)   |
|           |                                                                                                | Strongly disagree                | 6 (0.9)    |
| 2.2.4     | I have no worries about putting my life in my doctor's hands                                   | Strongly agree                   | 110 (15.9) |
|           |                                                                                                | Agree                            | 363 (52.4) |
|           |                                                                                                | Neutral                          | 135 (19.5) |
|           |                                                                                                | Disagree                         | 74 (10.7)  |
|           |                                                                                                | Strongly disagree                | 11 (1.6)   |
| 2.2.5     | Which of the following sources of medical information do you trust most?                       | Healthcare professional's advice | 627 (90.6) |
|           |                                                                                                | Family and friends               | 36 (5.2)   |
|           |                                                                                                | Online medical sources           | 24 (3.5)   |

|  |  |                                          |         |
|--|--|------------------------------------------|---------|
|  |  | Television programmes and advertisements | 4 (0.6) |
|  |  | Radio programmes and advertisements      | 1 (0.1) |

For peer review only

Table S4. Assessment of practices

| Questions |                                                                                                                                                                                                                                            |                         | N (%)        |
|-----------|--------------------------------------------------------------------------------------------------------------------------------------------------------------------------------------------------------------------------------------------|-------------------------|--------------|
|           |                                                                                                                                                                                                                                            |                         | Total N= 693 |
| 2.3.1.1   | Would you go to the doctor for a cough and runny nose that lasted less than 1 week                                                                                                                                                         | Yes                     | 294 (42.4)   |
|           |                                                                                                                                                                                                                                            | No                      | 377 (54.4)   |
|           |                                                                                                                                                                                                                                            | Unsure                  | 22 (3.2)     |
| 2.3.1.2   | Would you go to the doctor for diarrhoea, vomiting and stomach pain that lasted less than 1 week?                                                                                                                                          | Yes                     | 414 (59.7)   |
|           |                                                                                                                                                                                                                                            | No                      | 262 (37.8)   |
|           |                                                                                                                                                                                                                                            | Unsure                  | 17 (2.5)     |
| 2.3.2.1   | Would you expect the doctor to prescribe antibiotics for cough and runny nose that lasted less than 1 week to help with the recovery?                                                                                                      | Yes                     | 136 (19.6)   |
|           |                                                                                                                                                                                                                                            | No                      | 508 (73.3)   |
|           |                                                                                                                                                                                                                                            | Unsure                  | 49 (7.1)     |
| 2.3.2.2   | Would you expect the doctor to prescribe antibiotics for diarrhoea, vomiting and stomach pain that lasted less than 1 week to help with the recovery?                                                                                      | Yes                     | 120 (17.3)   |
|           |                                                                                                                                                                                                                                            | No                      | 501 (72.3)   |
|           |                                                                                                                                                                                                                                            | Unsure                  | 72 (10.4)    |
| 2.3.3.1   | If the doctor you were seeing does not prescribe you antibiotics for cough and runny nose that lasted less than 1 week, would you seek another doctor's opinion or firmly request the doctor for an antibiotic prescription?               | Yes                     | 37 (5.3)     |
|           |                                                                                                                                                                                                                                            | No                      | 619 (89.3)   |
|           |                                                                                                                                                                                                                                            | Unsure                  | 37 (5.3)     |
| 2.3.3.2   | If the doctor you were seeing does not prescribe you antibiotics for diarrhea vomiting and stomach pain that lasted less than 1 week, would you seek another doctor's opinion or firmly request the doctor for an antibiotic prescription? | Yes                     | 40 (5.8)     |
|           |                                                                                                                                                                                                                                            | No                      | 615 (88.7)   |
|           |                                                                                                                                                                                                                                            | Unsure                  | 38 (5.5)     |
| 2.3.4.1   | What do you usually do with left over antibiotics?                                                                                                                                                                                         | No left overs           | 476 (68.7)   |
|           |                                                                                                                                                                                                                                            | Disposal in rubbish bin | 130 (18.8)   |
|           |                                                                                                                                                                                                                                            | Keep for future use     | 60 (8.7)     |

|         |                                                                             |                               |            |
|---------|-----------------------------------------------------------------------------|-------------------------------|------------|
|         |                                                                             | Unsure                        | 19 (2.7)   |
|         |                                                                             | Pour down sink or toilet bowl | 8 (1.2)    |
| 2.3.4.2 | Have you ever shared antibiotics with anyone else?                          | Yes                           | 23 (3.3)   |
|         |                                                                             | No                            | 670 (94.5) |
| 2.3.4.3 | Have you ever taken leftover antibiotics from a previous course of illness? | Yes                           | 38 (5.5)   |
|         |                                                                             | No                            | 655 (9.5)  |

Table S5. Molecular classification of ceftriaxone-resistant *E coli* isolates

|                                           | <i>E coli</i>     |                       | p-value       |        |
|-------------------------------------------|-------------------|-----------------------|---------------|--------|
|                                           | N=71 (%)          |                       |               |        |
|                                           | ST131<br>N=11 (%) | Non ST131<br>N=60 (%) |               |        |
| Number of resistant genes (mean $\pm$ sd) |                   | 1.2 $\pm$ 0.4         | 1.9 $\pm$ 0.8 | 0.0012 |
| ESBL genes                                |                   |                       |               |        |
| CTXM                                      | 15                | 4 (36.4)              | 17 (28.3)     | 0.72   |
|                                           | 27                | 7 (63.6)              | 9 (15.0)      |        |
|                                           | 14                | 0 (0.0)               | 10 (16.7)     |        |
|                                           | 55                | 0 (0.0)               | 9 (15.0)      |        |
|                                           | 8                 | 0 (0.0)               | 3 (5.0)       |        |
|                                           | Others            | 0 (0.0)               | 9 (15.0)      |        |
|                                           | None              | 0 (0.0)               | 3 (5.0)       |        |
| SHV                                       | 12                | 0 (0.0)               | 3 (5.0)       | 1.0    |
|                                           | None              | 11 (100.0)            | 57 (95.0)     |        |
| TEM                                       | 206               | 1 (9.1)               | 11 (18.3)     | 0.11   |
|                                           | 198               | 0 (0.0)               | 3 (5.0)       |        |
|                                           | Others            | 0 (0.0)               | 15 (25.0)     |        |

|                      |      |           |           |       |
|----------------------|------|-----------|-----------|-------|
|                      | None | 10 (90.9) | 31 (51.7) |       |
| OXA                  |      | 1 (9.1)   | 3 (5.0)   | 1.0   |
| Quinolone resistance |      | 8 (72.7)  | 21 (35.0) | 0.041 |

\* Non-ST131 sequence types are: 38 (N=8), 1193 (N=5), 10 (N=4), 48 (N=3), other (N=35), none (N=5)

For peer review only

**STROBE 2007 (v4) checklist of items to be included in reports of observational studies in epidemiology\***  
**Checklist for cohort, case-control, and cross-sectional studies (combined)**

| Section/Topic             | Item # | Recommendation                                                                                                                                                                                                                                                                                                                                                                                                                                                         | Reported on page # |
|---------------------------|--------|------------------------------------------------------------------------------------------------------------------------------------------------------------------------------------------------------------------------------------------------------------------------------------------------------------------------------------------------------------------------------------------------------------------------------------------------------------------------|--------------------|
| Title and abstract        | 1      | (a) Indicate the study's design with a commonly used term in the title or the abstract                                                                                                                                                                                                                                                                                                                                                                                 | 2                  |
|                           |        | (b) Provide in the abstract an informative and balanced summary of what was done and what was found                                                                                                                                                                                                                                                                                                                                                                    | 2                  |
| <b>Introduction</b>       |        |                                                                                                                                                                                                                                                                                                                                                                                                                                                                        |                    |
| Background/rationale      | 2      | Explain the scientific background and rationale for the investigation being reported                                                                                                                                                                                                                                                                                                                                                                                   | 4                  |
| Objectives                | 3      | State specific objectives, including any pre-specified hypotheses                                                                                                                                                                                                                                                                                                                                                                                                      | 4                  |
| <b>Methods</b>            |        |                                                                                                                                                                                                                                                                                                                                                                                                                                                                        |                    |
| Study design              | 4      | Present key elements of study design early in the paper                                                                                                                                                                                                                                                                                                                                                                                                                | 4-8                |
| Setting                   | 5      | Describe the setting, locations, and relevant dates, including periods of recruitment, exposure, follow-up, and data collection                                                                                                                                                                                                                                                                                                                                        | 4-5                |
| Participants              | 6      | (a) <i>Cohort study</i> —Give the eligibility criteria, and the sources and methods of selection of participants. Describe methods of follow-up<br><i>Case-control study</i> —Give the eligibility criteria, and the sources and methods of case ascertainment and control selection. Give the rationale for the choice of cases and controls<br><i>Cross-sectional study</i> —Give the eligibility criteria, and the sources and methods of selection of participants | 4-5                |
|                           |        | (b) <i>Cohort study</i> —For matched studies, give matching criteria and number of exposed and unexposed<br><i>Case-control study</i> —For matched studies, give matching criteria and the number of controls per case                                                                                                                                                                                                                                                 | NA                 |
| Variables                 | 7      | Clearly define all outcomes, exposures, predictors, potential confounders, and effect modifiers. Give diagnostic criteria, if applicable                                                                                                                                                                                                                                                                                                                               | 5-7                |
| Data sources/ measurement | 8*     | For each variable of interest, give sources of data and details of methods of assessment (measurement). Describe comparability of assessment methods if there is more than one group                                                                                                                                                                                                                                                                                   | 4-8                |
| Bias                      | 9      | Describe any efforts to address potential sources of bias                                                                                                                                                                                                                                                                                                                                                                                                              | 4-5                |
| Study size                | 10     | Explain how the study size was arrived at                                                                                                                                                                                                                                                                                                                                                                                                                              | 4-5                |
| Quantitative variables    | 11     | Explain how quantitative variables were handled in the analyses. If applicable, describe which groupings were chosen and why                                                                                                                                                                                                                                                                                                                                           | 7-8                |
| Statistical methods       | 12     | (a) Describe all statistical methods, including those used to control for confounding                                                                                                                                                                                                                                                                                                                                                                                  | 7-8                |
|                           |        | (b) Describe any methods used to examine subgroups and interactions                                                                                                                                                                                                                                                                                                                                                                                                    | 7-8                |
|                           |        | (c) Explain how missing data were addressed                                                                                                                                                                                                                                                                                                                                                                                                                            | NA                 |
|                           |        | (d) <i>Cohort study</i> —If applicable, explain how loss to follow-up was addressed<br><i>Case-control study</i> —If applicable, explain how matching of cases and controls was addressed                                                                                                                                                                                                                                                                              | 4-5                |

|                          |     |                                                                                                                                                                                                              |                        |
|--------------------------|-----|--------------------------------------------------------------------------------------------------------------------------------------------------------------------------------------------------------------|------------------------|
|                          |     | <i>Cross-sectional study</i> —If applicable, describe analytical methods taking account of sampling strategy                                                                                                 |                        |
|                          |     | (e) Describe any sensitivity analyses                                                                                                                                                                        | NA                     |
| <b>Results</b>           |     |                                                                                                                                                                                                              |                        |
| Participants             | 13* | (a) Report numbers of individuals at each stage of study—eg numbers potentially eligible, examined for eligibility, confirmed eligible, included in the study, completing follow-up, and analysed            | 8                      |
|                          |     | (b) Give reasons for non-participation at each stage                                                                                                                                                         | 8                      |
|                          |     | (c) Consider use of a flow diagram                                                                                                                                                                           | Supplementary material |
| Descriptive data         | 14* | (a) Give characteristics of study participants (eg demographic, clinical, social) and information on exposures and potential confounders                                                                     | 8-9                    |
|                          |     | (b) Indicate number of participants with missing data for each variable of interest                                                                                                                          | NA                     |
|                          |     | (c) <i>Cohort study</i> —Summarise follow-up time (eg, average and total amount)                                                                                                                             | NA                     |
| Outcome data             | 15* | <i>Cohort study</i> —Report numbers of outcome events or summary measures over time                                                                                                                          | NA                     |
|                          |     | <i>Case-control study</i> —Report numbers in each exposure category, or summary measures of exposure                                                                                                         | NA                     |
|                          |     | <i>Cross-sectional study</i> —Report numbers of outcome events or summary measures                                                                                                                           | 9-15                   |
| Main results             | 16  | (a) Give unadjusted estimates and, if applicable, confounder-adjusted estimates and their precision (eg, 95% confidence interval). Make clear which confounders were adjusted for and why they were included | 9-15                   |
|                          |     | (b) Report category boundaries when continuous variables were categorized                                                                                                                                    | 9-15                   |
|                          |     | (c) If relevant, consider translating estimates of relative risk into absolute risk for a meaningful time period                                                                                             | NA                     |
| Other analyses           | 17  | Report other analyses done—eg analyses of subgroups and interactions, and sensitivity analyses                                                                                                               | 9-15                   |
| <b>Discussion</b>        |     |                                                                                                                                                                                                              |                        |
| Key results              | 18  | Summarise key results with reference to study objectives                                                                                                                                                     | 15-17                  |
| Limitations              | 19  | Discuss limitations of the study, taking into account sources of potential bias or imprecision. Discuss both direction and magnitude of any potential bias                                                   | 17                     |
| Interpretation           | 20  | Give a cautious overall interpretation of results considering objectives, limitations, multiplicity of analyses, results from similar studies, and other relevant evidence                                   | 15-17                  |
| Generalisability         | 21  | Discuss the generalisability (external validity) of the study results                                                                                                                                        | 15-17                  |
| <b>Other information</b> |     |                                                                                                                                                                                                              |                        |
| Funding                  | 22  | Give the source of funding and the role of the funders for the present study and, if applicable, for the original study on which the present article is based                                                | 19-20                  |

\*Give information separately for cases and controls in case-control studies and, if applicable, for exposed and unexposed groups in cohort and cross-sectional studies.



1  
2  
3  
4 **Note:** An Explanation and Elaboration article discusses each checklist item and gives methodological background and published examples of transparent reporting. The STROBE  
5 checklist is best used in conjunction with this article (freely available on the Web sites of PLoS Medicine at <http://www.plosmedicine.org/>, Annals of Internal Medicine at  
6 <http://www.annals.org/>, and Epidemiology at <http://www.epidem.com/>). Information on the STROBE Initiative is available at [www.strobe-statement.org](http://www.strobe-statement.org).  
7  
8  
9  
10  
11  
12  
13  
14  
15  
16  
17  
18  
19  
20  
21  
22  
23  
24  
25  
26  
27  
28  
29  
30  
31  
32  
33  
34  
35  
36  
37  
38  
39  
40  
41  
42  
43  
44  
45  
46  
47

For peer review only

# BMJ Open

## Relating knowledge, attitude and practice of antibiotic use to extended spectrum beta-Lactamase producing Enterobacteriaceae carriage – results of a cross-sectional community survey

|                                 |                                                                                                                                                                                                                                                                                                                                                                                                                                                                                                                                                                                                                                                                                                                                                                                                                                                                                                                                                                |
|---------------------------------|----------------------------------------------------------------------------------------------------------------------------------------------------------------------------------------------------------------------------------------------------------------------------------------------------------------------------------------------------------------------------------------------------------------------------------------------------------------------------------------------------------------------------------------------------------------------------------------------------------------------------------------------------------------------------------------------------------------------------------------------------------------------------------------------------------------------------------------------------------------------------------------------------------------------------------------------------------------|
| Journal:                        | <i>BMJ Open</i>                                                                                                                                                                                                                                                                                                                                                                                                                                                                                                                                                                                                                                                                                                                                                                                                                                                                                                                                                |
| Manuscript ID                   | bmjopen-2018-023859.R2                                                                                                                                                                                                                                                                                                                                                                                                                                                                                                                                                                                                                                                                                                                                                                                                                                                                                                                                         |
| Article Type:                   | Research                                                                                                                                                                                                                                                                                                                                                                                                                                                                                                                                                                                                                                                                                                                                                                                                                                                                                                                                                       |
| Date Submitted by the Author:   | 23-Jan-2019                                                                                                                                                                                                                                                                                                                                                                                                                                                                                                                                                                                                                                                                                                                                                                                                                                                                                                                                                    |
| Complete List of Authors:       | Mo, Yin; National University Health System, Division of Infectious Diseases, University Medicine Cluster; Mahidol Oxford Tropical Medicine Research Unit<br>Seah, Ivan; National University Singapore Yong Loo Lin School of Medicine<br>Lye, Pei Shi Priscillia ; National University Singapore Yong Loo Lin School of Medicine<br>Kee, Xiang Lee Jamie ; National University Singapore Yong Loo Lin School of Medicine<br>Wong, Kien Yee Michael; National University Singapore Yong Loo Lin School of Medicine<br>Ko, Kwan Ki Karrie ; Singapore General Hospital, Department of Microbiology<br>Ong, Rick Twee-Hee ; National University Singapore Saw Swee Hock School of Public Health<br>Tambyah, Paul; National University Health System, Division of Infectious Diseases, University Medicine Cluster; National University of Singapore, Department of Medicine<br>Cook, Alex R ; National University Singapore Saw Swee Hock School of Public Health |
| <b>Primary Subject Heading</b>: | Infectious diseases                                                                                                                                                                                                                                                                                                                                                                                                                                                                                                                                                                                                                                                                                                                                                                                                                                                                                                                                            |
| Secondary Subject Heading:      | Public health, Epidemiology                                                                                                                                                                                                                                                                                                                                                                                                                                                                                                                                                                                                                                                                                                                                                                                                                                                                                                                                    |
| Keywords:                       | Extended-spectrum beta-lactamase producing Enterobacteriaceae, Antimicrobial resistance, Duration of antibiotic treatment                                                                                                                                                                                                                                                                                                                                                                                                                                                                                                                                                                                                                                                                                                                                                                                                                                      |
|                                 |                                                                                                                                                                                                                                                                                                                                                                                                                                                                                                                                                                                                                                                                                                                                                                                                                                                                                                                                                                |

SCHOLARONE™  
Manuscripts

1  
2  
3 Relating knowledge, attitude and practice of antibiotic use to extended spectrum beta-  
4 lactamase producing *Enterobacteriaceae* carriage – results of a cross-sectional  
5  
6  
7  
8 community Survey  
9

10  
11  
12  
13  
14 Yin MO<sup>1, 2, 3\*</sup>, Ivan SEAH<sup>4\*</sup>, Pei Shi Priscillia LYE<sup>4</sup>, Xiang Lee Jamie KEE<sup>4</sup>, Kien  
15  
16  
17 Yee Michael WONG<sup>4</sup>, Kwan Ki Karrie KO<sup>5</sup>, Rick Twee-Hee ONG<sup>6</sup>, Paul  
18  
19 Anantharajah TAMBYAH<sup>1, 2</sup>, Alex R COOK<sup>6</sup>  
20  
21  
22  
23  
24  
25

26 1. Division of Infectious Disease, University Medicine Cluster, National University  
27  
28 Hospital, 5 Lower Kent Ridge Road Singapore 119074; 2. Department of Medicine,  
29  
30 National University of Singapore, 21 Lower Kent Ridge Road Singapore 119077; 3.  
31  
32 Mahidol Oxford Tropical Medicine Research Unit, 420/6 Rajvithi Road,  
33  
34 Tunphyathai, Bangkok 10400; 4. Yong Loo Lin School of Medicine, 1E Kent Ridge  
35  
36 Road Singapore 119228; 5. Department of Microbiology, Singapore General  
37  
38 Hospital, Outram Road Singapore 169608; 6. Saw Swee Hock School of Public  
39  
40 Health, National University of Singapore, 21 Lower Kent Ridge Road Singapore  
41  
42 119077  
43  
44  
45  
46  
47  
48

49 \* Authors contributed to this work equally.  
50  
51  
52  
53

54 Correspondence to: Yin Mo [yin\\_mo@nuhs.edu.sg](mailto:yin_mo@nuhs.edu.sg) +65 67795555  
55  
56  
57

58 Word count: 2736  
59  
60

## ABSTRACT

Objectives: To study the correlation between knowledge, attitude and practices (KAP) of antibiotic consumption with epidemiology and molecular characteristics of ESBL-producing *Enterobacteriaceae* (ESBL-PE) carriage, in order to identify modifiable factors and public health interventions to reduce prevalence of multidrug resistant organism (MDRO) colonisation in the community.

Design: Cross-sectional questionnaire of KAP towards antibiotic use and collection of stool samples or rectal swabs. ESBL-PE isolates obtained underwent whole genome sequencing to identify resistance genes.

Setting: A densely populated community in Singapore

Participants: There were 693 healthy community-dwelling questionnaire respondents. Out of which, 305 provided stool samples or rectal swabs.

Results: The overall knowledge of antibiotic use was poor (mean score 4.6/10, IQR 3.0-6.0). 80 participants (80/305, 26.2%) carried at least one ESBL-PE isolate. The most common ESBL-PE was *E. coli* sequence type 131 carrying CTX-M type beta-lactamases (11/71, 15.5%). Living overseas for more than 1 year (OR 3.3, 95% CI 1.6 to 6.9) but not short-term travel, recent hospitalisation or antibiotic intake was associated with ESBL-PE carriage. Interestingly, higher knowledge scores (OR 2.0, 95%CI 1.03 to 3.9) and having no left over antibiotics (OR 2.4, 95%CI 1.2 to 4.9) were independent factors associated with ESBL-PE carriage in the multivariate logistic regression model.

Conclusions: While the role of trans-border transmission of antimicrobial resistance is well known, we may have to examine the current recommendation that all antibiotics courses have to be completed. Clinical trials to determine the optimum duration of treatment for common infections are critically important.

1  
2  
3 (246 words)  
4  
5  
6  
7

## 8 **ARTICLE SUMMARY**

### 9 **Strengths and limitations of this study**

- 10  
11  
12
- 13 • We adopted a novel approach of correlating the antibiotic consumption behavior of  
14 the patients and general public with asymptomatic multidrug resistance  
15 colonisation.  
16  
17
  - 18 • Based on individual-level data, we found a high prevalence of asymptomatic  
19 carriage of extended spectrum beta-lactamase producing *Enterobacteriaceae* in a  
20 country with strict antibiotic prescription policies, and this was independently  
21 associated with not having left over antibiotics.  
22  
23
  - 24 • We minimised recall and interviewer biases by designing specific questions that  
25 are carefully constructed to maximize accuracy and completeness, and all  
26 interviewers were trained to adhere to the question and answer format strictly.  
27  
28
  - 29 • Given that the minimum effective treatment durations for many infections have not  
30 been determined and that a significant proportion of antibiotic prescriptions are  
31 inappropriate, the widely accepted message on the necessity to complete antibiotic  
32 courses to reduce antibiotic resistance may have to be re-examined.  
33  
34
  - 35 • Our findings have the potential to guide clinicians and policy makers in addressing  
36 this question as part of the effort to control antimicrobial resistance.  
37  
38  
39  
40  
41  
42  
43  
44  
45  
46  
47  
48  
49  
50  
51  
52  
53  
54  
55  
56  
57  
58  
59  
60

## INTRODUCTION

Multidrug resistant *Enterobacteriaceae* (MDRE) have been identified as “critical priority” resistant organisms by the World Health Organization (WHO) in 2017, and are associated with a high overall all-cause mortality, transmissibility and burden.[1] Resistance in *Enterobacteriaceae* is most commonly mediated via the production of extended-spectrum beta-lactamases (ESBL) and carbapenemases.[2] MDRE infections are difficult to treat with few effective antimicrobials on the horizon.[1] Healthy members of the community are increasingly identified as a reservoir of antimicrobial resistance (AMR), especially in the case of ESBL-producing *Enterobacteriaceae* (ESBL-PE).[3] Asymptomatic carriage of ESBL-PE has been associated with more infections, longer hospitalisations, earlier time to death, and higher hospital costs.[4,5]

South East Asian (SEA) countries are known to be a hot spot for AMR.[6] However, the region is heterogeneous with varying healthcare standards and antimicrobial stewardship and utilisation policies.[7] To aid in designing effective public health policies and engage the community in the campaign against AMR, it is crucial to understand the local knowledge, attitude and practices of antibiotic use. This study aims to correlate the epidemiological and behavioral risk factors of ESBL-PE carriage in Singapore, a high-income country in SEA, as well as delineate the genetic mechanisms associated with these resistant organisms.

## METHODOLOGY

### Study population

1  
2  
3 The study was carried out in Clementi Township, a densely populated residential area  
4 in the west of Singapore. It comprises 27,142 households with 91,630 residents who  
5 are socio-demographically comparable to the general Singapore population in terms  
6 of age, gender, ethnicity and housing distribution.[8] The study team returned to non-  
7 responding households for up to three times on separate days to maximise the  
8 response rate. The first adult above 21 years old in each household who responded to  
9 the study team was invited to participate in this cross-sectional study; all consenting  
10 individuals undertook a questionnaire, while some additionally consented to provide a  
11 rectal swab or stool sample. To calculate the number of samples required to estimate  
12 the prevalence of ESBL-PE in the community, we used one-sample Z-test with an  
13 estimated prevalence of 50%, a confidence interval of 95% and maximum tolerable  
14 error of 10%. This yielded about 100 stool samples. Ethical approval was obtained  
15 from National University of Singapore Institutional Review Board (Reference number  
16 B-16-245).

### 17 18 19 20 21 22 23 24 25 26 27 28 29 30 31 32 33 34 35 36 37 38 **Questionnaire on knowledge, attitudes and practices (KAP) on antibiotic intake** 39 40 **and health-seeking behaviour**

41 We conducted a questionnaire study to assess the KAP of participants towards  
42 antibiotic use. A 40-item questionnaire was developed after performing a thorough  
43 literature review of comparable studies.[9–14] This was then validated by a pilot  
44 study involving 75 community-dwelling volunteers to ensure fluency and accuracy in  
45 question design and language. A team of thirty-three investigators was trained to  
46 administer the survey face-to-face, in languages that the participants are fluent in with  
47 standardised explanations, to ensure consistency.  
48  
49  
50  
51  
52  
53  
54  
55  
56  
57  
58  
59  
60

1  
2  
3 The questionnaire comprised four main sections. The first covered socio-demographic  
4 data and recent antibiotic intake. The second was an assessment of antibiotic  
5 consumption practices, in which two hypothetical scenarios of diarrhoea and upper  
6 respiratory tract symptoms were presented, and participants were asked if they would  
7 visit the doctor should they experience these symptoms for less than 1 week, if they  
8 would expect or insist on an antibiotic prescription from the doctor's visit, and if they  
9 would seek a second opinion if antibiotics were not prescribed. The third component  
10 assessed participants' attitudes and trust towards primary care healthcare providers,  
11 and was adapted from a validated questionnaire from Hall *et al.*[15] The last  
12 component examined participants' knowledge on AMR. The full questionnaire and  
13 grading system can be found in Table S1.  
14  
15  
16  
17  
18  
19  
20  
21  
22  
23  
24  
25  
26  
27  
28  
29  
30

### 31 **Bacterial isolation and antibiotic susceptibility testing**

32  
33 The study team requested fresh stool samples or rectal swabs from all study  
34 participants. The samples of those who consented were collected from the participants  
35 within 24 hours of production and stored centrally at 0-4°C prior to microbiological  
36 processing. All sample processing was carried out in the Singapore General Hospital  
37 Diagnostic Bacteriology Laboratory. Samples were inoculated onto *CHROMagar<sup>TM</sup>*  
38 *ESBL* and *CHROMID<sup>®</sup> CARBA SMART (bioMerieux)* media to detect cephalosporin-  
39 resistant and carbapenem-resistant Gram-negative bacteria, respectively. After 24  
40 hours of incubation, growing colonies were sub-cultured onto sheep blood agar and  
41 used for subsequent species identification and antibiotic susceptibility testing. Species  
42 identification was done by matrix-assisted laser desorption/ionization-time of flight  
43 mass spectrometry (MALDI-TOF MS) (Bruker) and the Vitek-2 (*bioMerieux*) system.  
44  
45  
46  
47  
48  
49  
50  
51  
52  
53  
54  
55  
56  
57  
58  
59  
60



1  
2  
3 Antibiotic susceptibilities to ampicillin, cefazolin, ceftriaxone, ceftiofur, cefepime,  
4 amoxicillin-clavulanic acid, piperacillin-tazobactam, aztreonam, amikacin,  
5 nitrofurantoin, sulfamethoxazole-trimethoprim, gentamicin, ciprofloxacin, fosfomycin,  
6 ertapenem and meropenem were assessed by the disc diffusion method and  
7 interpreted according to the Clinical Laboratory Standards Institute (CLSI)  
8 criteria.[16] *Enterobacteriaceae* isolates that were not susceptible to third/ fourth  
9 generation cephalosporins were identified as potential ESBL producers, while those  
10 not susceptible to any carbapenem were identified as potential carbapenemase  
11 producers. Potential carbapenemase producers were tested phenotypically for  
12 carbapenemase production by modified Hodge test and KPC/MBL and OXA-48  
13 Confirm Kit (ROSCO). All potential carbapenemase producers were also subjected to  
14 the Xpert® Carba-R test (Cepheid) targeting KPC, NDM, OXA-48 like, IMP and VIM  
15 carbapenemase gene sequences.

### 36 **Whole genome sequencing of ESBL-producing *Enterobacteriaceae***

37  
38 DNA extraction was performed for all *Enterobacteriaceae* isolates that are potentially  
39 ESBL- or carbapenemase- producers, with sequencing libraries for each isolate  
40 prepared as per manufacturer's recommendation to be multiplexed sequenced on the  
41 Illumina HiSEQ platform generating paired-end sequence reads of 2x150 basepairs,  
42 having a data throughput of 1GB per isolate. De-novo assembly of the Illumina reads  
43 was performed using the SPAdes Genome Assembler.[17] Bacterial species were  
44 identified using Kraken,[18] comparing with phenotypic results. Multi-locus sequence  
45 types (MLSTs) were determined by a customized script utilising BLAST search for  
46 identification of genotypes at each loci.[19] Genotypic prediction of antimicrobial  
47  
48  
49  
50  
51  
52  
53  
54  
55  
56  
57  
58  
59  
60

1  
2  
3 resistance owing to the existence of specific gene sequences were performed using  
4  
5 SRST2.[20]  
6  
7  
8  
9

### 10 **Statistical Analysis**

11  
12 Univariate descriptive analyses are presented for socio-demographics, ESBL-PE or C-  
13  
14 PE carriage status and presence of specific resistance genes. Dichotomous variables  
15  
16 are expressed in frequencies and percentages, while continuous variables are in means  
17  
18 with standard deviation (SD). Categorical variables are compared with  $\chi^2$  and Fisher's  
19  
20 exact tests and continuous variables with unpaired, 2-tailed t tests or nonparametric  
21  
22 Wilcoxon rank sum tests as appropriate. Linear and logistic regressions are used in  
23  
24 multivariate analyses to identify statistically significant factors that influence and  
25  
26 determine KAP and ESBL-PE carriage. Covariates that were found to be statistically  
27  
28 significant in the univariate analyses were included in the multivariate models. All  
29  
30 tests of significance are performed at  $\alpha=5\%$ . Statistical analysis was carried out using  
31  
32 R Version 1.1.383.[21]  
33  
34  
35  
36  
37  
38  
39

### 40 **Patient and Public Involvement**

41  
42 A group of 75 community dwellers partnered with us for the design and validation of  
43  
44 the study questionnaire to ensure clarity and accuracy, production of informational  
45  
46 material to support recruitment, and evaluation of the burden of the sample collection  
47  
48 from the patient's perspective. Because there was no clear preference for the sample  
49  
50 collection methodology, the study team decided to offer both options of rectal swab  
51  
52 and stool collection to the study participants.  
53  
54  
55  
56  
57

### 58 **RESULTS**

From June 2016 to April 2017, we randomly selected 2,200 households in Clementi for home visits. Out of these 2200 households, 693 (31.5%) agreed to participate, of whom 305 (44.0%) also provided stool samples or rectal swabs (Figure S1). Participant demographics are presented in Table 1. The median age of participants was 53 (IQR 38-66). A slight majority were women (393/693, 56.7%). The ethnic distribution of the participants was similar to the wider Singapore population, with 513 (74.0%) Chinese, 78 (11.3%) Malay, and 83 (12.0%) Indian. The majority had received at least secondary school education (534/693, 77.0%), and stayed in public housing apartments (661/693, 95.4%). The median number of occupants per household was 3 (IQR 2-4) persons. A quarter (25.3%, 175/693) reported having taken antibiotics in the past 6 months, and 102 (14.7%) had recently been hospitalised in the past 1 year.

Table 1. Demographics, medical background and antibiotic use of study participants

| Characteristic                       |                                | N (%)            |
|--------------------------------------|--------------------------------|------------------|
|                                      |                                | Total N=693      |
| Age (median, IQR*)                   |                                | 53.0 (38.0-66.0) |
| Females                              |                                | 393 (56.7)       |
| Race                                 | Chinese                        | 513 (74.0)       |
|                                      | Malay                          | 78 (11.3)        |
|                                      | Indian                         | 83 (12.0)        |
|                                      | Other ethnicities              | 19 (2.7)         |
| Education level                      | Graduate                       | 88 (12.7)        |
|                                      | Diploma                        | 251 (36.2)       |
|                                      | Secondary                      | 195 (28.1)       |
|                                      | Primary                        | 122 (17.6)       |
|                                      | No Formal Education            | 37 (5.3)         |
| Housing type                         | 1-, 2 or 3-room public housing | 334 (48.2)       |
|                                      | 4 or 5- room public housing    | 327 (47.2)       |
|                                      | Private landed property        | 32 (4.6)         |
| Number of occupants in the household | Overall (median, IQR)          | 3 (2-4)          |
|                                      | ≤ 3 persons                    | 369 (53.2)       |
|                                      | 4-5 persons                    | 257 (37.1)       |
|                                      | ≥ 6 persons                    | 67 (9.7)         |

|                                           |                         |            |
|-------------------------------------------|-------------------------|------------|
| Comorbidities                             | Any chronic illnesses   | 239 (34.5) |
|                                           | Hypertension            | 105 (15.2) |
|                                           | Hyperlipidemia          | 76 (11.0)  |
|                                           | Diabetes mellitus       | 67 (9.7)   |
| Recent hospitalisation in the past 1 year |                         | 102 (14.7) |
| Antibiotic consumption                    | Within past 6 months    | 175 (25.3) |
|                                           | More than 6 months ago  | 441 (63.6) |
|                                           | Never taken antibiotics | 77 (11.1)  |

\*IQR- interquartile range, ^Immunocompromised – Use of chemotherapy, corticosteroids or immunosuppressants in the past 6 months

The survey revealed widespread misinformation about antibiotics, with a mean knowledge score of only 4.6 (IQR 3.0-6.0) out of 10 (Table S2). Although the majority of participants knew that viruses are the most common cause of upper respiratory tract infections, a significant proportion (335/693, 48.3%) believed that antibiotics could be used for viral infections and 385 (385/693, 55.6%) thought that the most common cause of diarrhoea was bacteria. The questionnaire also explored participants' compliance to the widely accepted view of completing antibiotic courses. The majority (554/693, 79.9%) said they would complete the course of antibiotics prescribed, while 13.7% (95/693) would stop taking antibiotics when they start to feel better, and 6.3% (44/693) preferred to seek the doctor's opinion before stopping the course. Most participants (564/693, 81.4%) were aware that antibiotics are prescription-only drugs in Singapore, but were unable to correctly answer questions related to AMR, with 82.5% (572/693) not knowing what causes AMR, and 63.2% (438/693) believing AMR was not present in Singapore. Level of education ( $p<0.001$ ) and staying in larger housing ( $p=0.037$ )—the usual proxies for socio-economic status in Singapore—were independent factors associated with higher total knowledge scores. However, higher knowledge scores were not strongly related to participants' trust in primary care physicians (OR 1.08, 95%CI 0.97-1.20) or the

1  
2  
3 expectation of an antibiotic prescription for common viral infections (OR 0.98,  
4  
5 95%CI 0.96-1.0).  
6  
7  
8  
9

10 A large majority of the community continued to place trust in their primary care  
11  
12 doctors (Table S3). Most strikingly, 627 participants (627/693, 90.6%) trusted  
13  
14 healthcare professionals as their primary source of medical information, over the  
15  
16 Internet, media and family and friends. There were no significant associations  
17  
18 between demographic factors and attitude scores in contrast to the differences seen in  
19  
20 knowledge scores.  
21  
22  
23  
24  
25

26 In the two scenarios (of having an upper-respiratory tract infection or diarrhoea and  
27  
28 vomiting), although about half of the participants (294/693, 42.4% for cough and  
29  
30 runny nose, 414/693, 59.7% for diarrhoea and vomiting) envisioned visiting the  
31  
32 doctor for common complaints lasting less than 1 week, only 18.5% (average  
33  
34 128/693) expected an antibiotic prescription (Table S4). Were antibiotics not  
35  
36 prescribed during the initial visit, very few (average 39/693, 5.6%) reported they  
37  
38 would insist on antibiotic prescription or seek a second opinion. The only independent  
39  
40 factor associated with the expectation of an antibiotic prescription was younger age  
41  
42 (OR 0.98, 95%CI 0.97- 0.99) in multivariate logistic analysis. In dealing with leftover  
43  
44 antibiotics, the majority 68.7% (476/693) declared that they do not have leftovers  
45  
46 antibiotics; others reported keeping them for future use (60/693, 8.7%) or disposing  
47  
48 with solid waste (130/693, 18.8%) or down the drain (8/693, 1.2%). Only 3.3%  
49  
50 (23/693) admitted to having previously shared antibiotics with family members and  
51  
52 5.5% (38/693) to having taken leftover antibiotics from a previous illness.  
53  
54  
55  
56  
57  
58  
59  
60

### Asymptomatic carriage of ESBL-PE

Three hundred and five participants (305/693, 44.0%) provided rectal swabs or stool samples for microbiology cultures. The participants who provided stool samples were not significantly different from those who did not, in terms of age, gender and education level. Eighty participants (80/305, 26.2%, 95%CI: 21.5-31.6%) were found to carry at least one ceftriaxone non-susceptible *Enterobacteriaceae* isolate. One hundred and fifteen isolates were detected on the ESBL screening media, of which 93 were ceftriaxone resistant or intermediate *Enterobacteriaceae*. Six bacterial isolates were detected on the CRE screening media, none of which were confirmed to be carbapenemase-producing *Enterobacteriaceae*. The factors associated with ESBL-PE carriage from multivariate logistic regression analysis were residency overseas for more than 1 year (OR 3.3, 95%CI 1.6-6.9), with the most common location being other parts of Asia, scoring higher than 6 on the knowledge component in the questionnaire (OR 2.0 95%CI 1.03- 3.9) and having no left over antibiotics (OR 2.4, 95%CI 1.24-4.9). Interestingly, recent hospitalisation and reported antibiotic intake were not associated with ESBL-PE carriage (Table 2).

Table 2. Univariate analysis of demographic characteristics associated with carriage of ceftriaxone- resistant *Enterobacteriaceae*

| Factors            |           | Total<br>N=305   | Carriers<br>N=80 | Non-carriers<br>N=225 | p-<br>values |
|--------------------|-----------|------------------|------------------|-----------------------|--------------|
| Age (median, IQR*) |           | 54.0 (41.0-65.0) | 56.0 (38.8-66.0) | 54.0 (41.0-65.0)      | 0.79         |
| Females (%)        |           | 169 (55.4)       | 46 (57.5)        | 123 (54.7)            | 0.76         |
| Ethnicity (%)      | Chinese   | 237 (77.7)       | 67 (83.8)        | 170 (75.6)            | 0.24         |
|                    | Malay     | 28 (9.2)         | 3 (3.8)          | 25 (11.1)             |              |
|                    | Indian    | 30 (9.8)         | 7 (8.8)          | 23 (10.2)             |              |
|                    | Others    | 10 (3.3)         | 3 (3.8)          | 7 (3.1)               |              |
| Education (%)      | No formal | 11 (3.6)         | 4 (5.0)          | 7 (3.1)               | 0.45         |

|                                                                   |                                    |            |           |            |        |
|-------------------------------------------------------------------|------------------------------------|------------|-----------|------------|--------|
|                                                                   | education                          |            |           |            |        |
|                                                                   | Primary                            | 57 (18.7)  | 12 (15.0) | 45 (20.0)  |        |
|                                                                   | Secondary                          | 93 (30.5)  | 21 (26.2) | 72 (32.0)  |        |
|                                                                   | Tertiary                           | 110 (36.1) | 31 (38.8) | 79 (35.1)  |        |
|                                                                   | Graduate                           | 34 (11.1)  | 12 (15.0) | 22 (9.8)   |        |
| Housing (%)                                                       | HDB 1- and 2-room                  | 23 (7.5)   | 5 (6.2)   | 18 (8.0)   | 0.75   |
|                                                                   | HDB 3-room                         | 115 (37.7) | 32 (40.0) | 83 (36.9)  |        |
|                                                                   | HDB 4-room                         | 98 (32.1)  | 24 (30.0) | 74 (32.9)  |        |
|                                                                   | HDB 5-room and Executive Apartment | 47 (15.4)  | 11 (13.8) | 36 (16.0)  |        |
|                                                                   | Landed Property                    | 22 (7.2)   | 8 (10.0)  | 14 (6.2)   |        |
| Pets (%)                                                          |                                    | 33 (10.8)  | 7 (8.8)   | 26 (11.6)  | 0.75   |
| Number of occupants in the household (mean, sd)                   |                                    | 3.6 (1.6)  | 3.6 (1.6) | 3.6 (1.6)  | 0.71   |
| Stayed overseas for >1 year (%)                                   |                                    | 57 (18.7)  | 26 (32.5) | 31 (13.8)  | <0.001 |
| Stayed in South, East or Southeast Asia for >1 year (%)           |                                    | 40 (13.1)  | 18 (22.5) | 22 (9.8)   | 0.01   |
| Travelled in the past >1 year (%)                                 |                                    | 178 (58.4) | 47 (58.8) | 131 (58.2) | 1.0    |
| Travelled in South, East or Southeast Asia in the past 1 year (%) |                                    | 163 (53.4) | 43 (53.8) | 120 (53.3) | 1.0    |
| Any chronic illnesses (%)                                         |                                    | 127 (41.6) | 33 (41.2) | 94 (41.8)  | 1.0    |
| Hospitalisation in the past 1 year (%)                            |                                    | 43 (14.1)  | 14 (17.5) | 29 (12.9)  | 0.41   |
| Previous antibiotics intake (%)                                   |                                    | 282 (92.5) | 76 (95.0) | 206 (91.6) | 0.45   |
| Antibiotics in the last 6 months (%)                              |                                    | 85 (27.9)  | 23 (28.8) | 62 (27.6)  | 0.61   |
| Knowledge score >6 (%)                                            |                                    | 89 (29.2)  | 33 (41.3) | 56 (24.9)  | 0.01   |
| No left over antibiotics (%)                                      |                                    | 211 (69.2) | 63 (78.8) | 148 (65.8) | 0.04   |

\*IQR- interquartile range

Out of the 93 ceftriaxone-resistant isolates, 17 were ceftioxin resistant, suggestive of AmpC  $\beta$ -Lactamase production. Only one *Enterobacter cloacae* complex isolate was resistant to ertapenem and was of intermediate susceptibility to meropenem (Table 3). This *Enterobacter cloacae* complex isolate was not a carbapenemase-producer based

on phenotypic and genotypic tests. Eighty-three (83/93, 89.2%) of these ESBL-PE isolates were *E. coli*. The majority of ESBL-PE remained susceptible to aminoglycosides including gentamicin (80/93, 86.0%) and amikacin (91/93, 97.8%) as well as nitrofurantoin (76/93, 81.7%), while ciprofloxacin (53/93, 57.0%) and Sulfamethoxazole-trimethoprim (32/93, 34.4%) resistance were more common.

Table 3. Antibiotic susceptibility of the ceftriaxone-resistant isolates

|                               | <i>E coli</i> (N=83)<br>N (%) | <i>Klebsiella</i> (N=6)<br>N (%) | Others^ (N=4)<br>N (%) | Total (N=93)<br>N (%) |
|-------------------------------|-------------------------------|----------------------------------|------------------------|-----------------------|
| Piperacillin-tazobactam       | 73 (88.0)                     | 4 (66.7)                         | 1 (25.0)               | 78 (83.9)             |
| Cefepime                      | 35 (42.4)                     | 3 (50)                           | 2 (50.0)               | 40 (43.0)             |
| Aztreonam                     | 39 (47.0)                     | 2 (33.3)                         | 1 (25.0)               | 42 (45.2)             |
| Amikacin                      | 82 (98.8)                     | 5 (83.3)                         | 4 (100)                | 91 (97.8)             |
| Gentamicin                    | 75 (90.4)                     | 3 (50)                           | 2 (50.0)               | 80 (86.0)             |
| Nitrofurantoin                | 73 (88.0)                     | 2 (33.3)                         | 1 (25.0)               | 76 (81.7)             |
| Sulfamethoxazole-trimethoprim | 32 (38.6)                     | 0 (0)                            | 0 (0)                  | 32 (34.4)             |
| Ciprofloxacin                 | 48 (57.8)                     | 4 (66.7)                         | 1 (25.0)               | 53 (57.0)             |
| Fosfomycin                    | 63 (75.9)                     | 1 (16.7)                         | 0 (0)                  | 64 (68.8)             |
| Ertapenem                     | 83 (100)                      | 6 (100)                          | 3 (75.0)               | 92 (98.9)             |
| Meropenem                     | 83 (100)                      | 6 (100)                          | 3 (75.0)               | 92 (98.9)             |

^ Others include *Enterobacter* spp (2), *Proteus mirabilis* (1), *Raoultella ornithinolytica* (1)

### Molecular classification of ESBL-PE

Eighty (80/93, 85%) ESBL-PE isolates from unique participants underwent whole genome sequencing. When two or more isolates grew from a single subject's sample, *E. coli*, the commonest species observed, was selected to facilitate comparisons. Genotypic species determination from the sequence reads correlated completely with the results by MALDI-TOF MS or the Vitek-2 system. Seventy-one (71/80, 88.8%)



1  
2  
3 isolates were *E. coli*, of which the most common molecular type was sequence type  
4 (ST) 131 (11/71, 15.5%) (Table S5). The most frequently observed ESBL gene was  
5 CTX-M (62/80, 77.5%), especially CTX-M-15 (21/71, 29.6%) and CTX-M-27  
6 (16/71, 22.5%). *E. coli* ST131 were more resistant to fluoroquinolones than non-  
7 ST131 isolates ( $p=0.041$ ). The only significant factor from the questionnaire  
8 associated with ESBL-producing *E. coli* ST131 carriage was having more children in  
9 the household, but the difference was marginal (mean  $0.3\pm 0.7$  versus  $0.8 \pm 1.1$ ,  
10  $p=0.034$ ).  
11  
12  
13  
14  
15  
16  
17  
18  
19  
20  
21  
22  
23

## 24 DISCUSSION

25  
26 We found a significant burden of ESBL-PE carriage (80/305, 26.2%) among healthy  
27 community dwellers in Singapore, twice the rate found in an earlier study in 2014 of  
28 patients at an emergency department.[22] Similar rises have been observed  
29 globally.[3] Although these figures are lower than the reported prevalence of over  
30 40% fecal carriage with ESBL-PE elsewhere in South and South East Asia, they are  
31 much higher than the 1.5-3% observed in the US and UK.[3] Singapore has a tightly  
32 regulated antibiotic prescription system similar to Europe and the US where only  
33 registered medical practitioners are allowed to prescribe antibiotics, and they must be  
34 purchased from licensed dispensers. We did not find any association between fecal  
35 carriage of ESBL-PE and short-term travel, unlike other studies.[23] Singapore is a  
36 city-state and overseas travel is very common, making it hard to detect such a  
37 relationship when frequent trips to neighbouring countries are made. However, past  
38 residency overseas was strongly associated with colonisation, especially those who  
39 lived elsewhere in South or South East Asia (OR 3.3, 95%CI 1.6- 6.9). Distinctions  
40 should be made in future studies on overseas travels and AMR carriage in terms of  
41  
42  
43  
44  
45  
46  
47  
48  
49  
50  
51  
52  
53  
54  
55  
56  
57  
58  
59  
60

1  
2  
3 duration and frequency of travel, in addition to destinations. The possibility of  
4  
5 substantial acquisition of MDRO colonisation and infection through overseas  
6  
7 exposure[24,25] once again highlights the urgent need for a regional, collaborative  
8  
9 approach to tackling the problem of AMR.  
10  
11  
12  
13

14  
15 In addition, we did not find an association between recent antibiotic intake in the past  
16  
17 6 months and ESBL-PE carriage. This is inconsistent with previous reports showing  
18  
19 that consumption of certain classes of antibiotics such as beta-lactams and  
20  
21 fluoroquinolones are risk factors for predispositions to ESBL-PE carriage. [26,27]  
22  
23 The possible reasons could be due to the relatively small number of participants who  
24  
25 had recent antibiotic intake (85/305, 27.9%), so we were not able to distinguish the  
26  
27 specific classes of antibiotics taken by the participants. It is also possible that the  
28  
29 dominance of a hyperendemic community-associated clone rather than antibiotic  
30  
31 selection pressure alone contributed to this finding.  
32  
33  
34  
35  
36  
37

38 Molecular typing of the ESBL-PE isolates from our cohort showed that *E. coli* ST131  
39  
40 with CTX-M beta-lactamases (11/71, 15.5%) were the most common ESBL  
41  
42 mechanism, echoing the global dissemination of this hyperendemic clone, especially  
43  
44 in the community.[28] Similar reports showed 11.1% (32/287) in China[29] and 4.1%  
45  
46 (8/193) in Thailand[30] have been published. The reason for the rapid worldwide  
47  
48 expansion and long-term persistence of *E. coli* ST131 is thought to be due to  
49  
50 compensatory mutations within the core genome counterbalancing the fitness cost  
51  
52 associated with IncF plasmids, thus sustaining its spread even in the absence of direct  
53  
54 antibiotic selection pressure.[31] These *E. coli* ST131 are not just prevalent colonisers  
55  
56 but have also associated with invasive bloodstream infections in hospitalized patients  
57  
58  
59  
60

1  
2  
3 in Australia, New Zealand and Singapore.[32] It will be important to better  
4  
5 understand the evolutionary ecology and transmission dynamics of this emerging  
6  
7 clone.  
8  
9

10  
11  
12 This study also revealed widespread misconceptions about the utility of antibiotics for  
13  
14 viral infections, consistent with the findings of a global survey conducted by the  
15  
16 WHO in 2015.[33] We also found that, the public continues to place trust in their  
17  
18 primary care doctors and their recommendations. This dependence on physicians is in  
19  
20 contrast to doctors' perceptions of patient expectations for antibiotic  
21  
22 prescriptions.[34] This discordance has been previously described and is thought to be  
23  
24 due to the lack of empowerment of the patient and the erroneous attribution of patient  
25  
26 satisfaction to antibiotic prescription rather than a focus on better patient-doctor  
27  
28 communication.[35,36]  
29  
30  
31  
32  
33

34  
35 Engaging and educating both the prescribers and the public may reduce inappropriate  
36  
37 antibiotic use,[37,38] and has been identified as a key strategy by the WHO and the  
38  
39 UK to tackle AMR.[39,40] One of the most striking findings of this study is that  
40  
41 having both the knowledge that antibiotic courses should be completed and not  
42  
43 having left over antibiotics is independently associated with the carriage of ESBL-PE.  
44  
45 Though these relationships cannot be viewed as causal given the complexities in the  
46  
47 emergence and transmission of AMR, there is emerging evidence supporting short  
48  
49 course antibiotic therapies, even for severe infections such as bacteremia, given the  
50  
51 collateral damage that antibiotics have on host microbiome.[41] The current WHO  
52  
53 recommendation remains that full courses of antibiotics should be completed to  
54  
55 prevent the onset of resistance.[33] Similar messages are advocated in national  
56  
57  
58  
59  
60

1  
2  
3 campaigns launched in Australia,[42] the United States[43] and Europe.[44] Given  
4  
5 that the minimum effective treatment durations have not been determined for many  
6  
7 infections and that a significant proportion of antibiotic prescriptions are  
8  
9 inappropriate, the emphasis on completing the course of antibiotics to prevent  
10  
11 resistance may have to be re-examined.  
12  
13

14  
15  
16  
17 To our knowledge, this is the first study that explored antibiotic consumption  
18  
19 behavior with the acquisition of MDRO at a community level. This novel approach  
20  
21 has the potential to guide clinicians and policy makers in identifying directly  
22  
23 actionable interventions for the population. The main weakness of our study is that  
24  
25 the questionnaire data is self-reported and subjected to recall and interviewer biases.  
26  
27 We minimised these errors by designing specific questions that are carefully  
28  
29 constructed to maximize accuracy and completeness, and all interviewers were trained  
30  
31 to adhere to the question and answer format strictly. Further research using antibiotic  
32  
33 prescription databases can potentially overcome some of the intrinsic biases arising  
34  
35 from cross-sectional questionnaires.  
36  
37  
38  
39  
40  
41

## 42 **CONCLUSION**

43  
44 There is a significant burden of asymptomatic ESBL-PE colonisation in Singapore,  
45  
46 especially with *E. coli* ST131 carrying CTX-M. This is correlated with KAP of  
47  
48 antibiotic use, especially with the practice of finishing full courses of antibiotics, and  
49  
50 prolonged residency in other parts of Asia. Innovative approaches to control AMR  
51  
52 that take into account transboundary transmission of resistance and clinical trials to  
53  
54 determine the appropriate duration of antimicrobial therapy will be critical to control  
55  
56  
57  
58  
59  
60

1  
2  
3 the emergence of these resistant clones which have contributed significantly to the  
4  
5 current global antibiotic resistance crisis.  
6  
7  
8  
9

## 10 **CONTRIBUTOR AND GUARANTOR INFORMATION**

11  
12 YM, PAT, ARC, IS, PSPL, XLJK and KYMW conceptualised and designed the  
13  
14 study. IS, PSPL, XLJK and KYMW conducted the study and collected data. KKKK  
15  
16 performed microbiological testing. RTHO planned and conducted genomic  
17  
18 sequencing and interpreted the results. YM, ARC, IS, PSPL, XLJK and KYMW  
19  
20 performed data analysis. All participated in the writing of the script, and affirm that  
21  
22 the manuscript is an honest, accurate, and transparent account of the study being  
23  
24 reported; that no important aspects of the study have been omitted; and that any  
25  
26 discrepancies from the study as originally planned have been explained. YM and IS  
27  
28 accept full responsibility for the work and/or the conduct of the study, had access to  
29  
30 the data, and controlled the decision to publish. The corresponding author attests that  
31  
32 all listed authors meet authorship criteria and no others meeting the criteria have been  
33  
34 omitted.  
35  
36  
37  
38  
39  
40  
41  
42

## 43 **ACKNOWLEDGEMENT**

44 The authors thank the study team members, Ang Chen Xiang, Anne Goei Hui Yi,  
45  
46 Charmaine Loh Hui Yun, Cheong Shao Wei Dominic, Chew Shi Jie, Chong Yvette,  
47  
48 Choo Hui Min Charlotte, Choo Xin Yi, Daveraj Sivasegaran, Dean Krishen Sethi,  
49  
50 Joshua Tan Teck Chin, Keith Ching Wei Jie, Khoo Chun Yuet, Krystal Khoo Oon  
51  
52 Hui, Lai Jieru, Liew Yi Song Terence, Lim Li Liang Joshua, Lok Si Ying Andrea,  
53  
54 Lynette Sim Pei Shuen, Michelle Sim Yan Lin, Mok Charlene, Ong Yuxuan Daniel,  
55  
56 Ong Zheng Xuan, Quek Keng Liang, R Krishnapriya, Sophia Ng Shuen Yii, Tan Fang  
57  
58  
59  
60

1  
2  
3 Min Grace, Tan Jian Wei, Tan Pei Min Mabelleline, Tay Yiling Elaine, Tey Min Li,  
4  
5 Wu Yanlin, Zhou Lingyue, for their contributions in carrying out home visits,  
6  
7 interviews and sample collections.  
8  
9

## 10 11 12 **COPYRIGHT/LICENCE FOR PUBLICATION**

13  
14 The Corresponding Author has the right to grant on behalf of all authors and does  
15  
16 grant on behalf of all authors, a worldwide licence to the Publishers and its licensees  
17  
18 in the perpetuity, in all forms, formats and media (whether known now or created in  
19  
20 the future), to i) publish, reproduce, distribute display and store the Contribution, ii)  
21  
22 translate the Contribution into other languages, create adaptations, reprints, include  
23  
24 within collections and create summaries, extracts and/or, abstracts of the  
25  
26 Contribution, iii) create any other derivative work(s) based on the Contribution, iv) to  
27  
28 exploit all subsidiary rights in the Contribution, v) the inclusion of electronic links  
29  
30 from the Contribution to third party material where-ever it may be located; and, vi)  
31  
32 licence any third party to do any or all of the above.  
33  
34  
35  
36  
37  
38  
39

## 40 **FUNDING**

41  
42 Data collection was supported from funding from the Infectious Diseases Research  
43  
44 Fund, National University of Singapore (NUS), and the Saw Swee Hock School of  
45  
46 Public Health (SSHSPH). RTHO received funding support from the SSHSPH, NUS.  
47  
48 ARC was supported by the Singapore Ministry of Health's National Medical  
49  
50 Research Council under the Centre Grant Programme - Singapore Population Health  
51  
52 Improvement Centre (NMRC/CG/C026/2017\_NUHS).  
53  
54  
55  
56  
57

## 58 **COMPETING INTERESTS DECLARATION**

1  
2  
3 All authors have completed the ICMJE uniform disclosure form at  
4  
5 www.icmje.org/coi\_disclosure.pdf and declare: no financial relationships with any  
6  
7 organisations that might have an interest in the submitted work in the previous three  
8  
9 years; no other relationships or activities that could appear to have influenced the  
10  
11 submitted work.  
12  
13  
14  
15  
16

## 17 DATA SHARING

18  
19 The authors commit to making the relevant anonymised patient level data available on  
20  
21 reasonable request.  
22  
23  
24  
25

## 26 REFERENCES

- 27  
28  
29 1 Tacconelli E, Carrara E, Savoldi A, *et al.* Discovery, research, and  
30  
31 development of new antibiotics: the WHO priority list of antibiotic-resistant  
32  
33 bacteria and tuberculosis. *Lancet Infect Dis* 2018;**18**:318–27.  
34  
35 doi:10.1016/S1473-3099(17)30753-3  
36  
37  
38 2 Ruppé É, Woerther P-L, Barbier F. Mechanisms of antimicrobial resistance in  
39  
40 Gram-negative bacilli. *Ann Intensive Care* 2015;**5**:61. doi:10.1186/s13613-015-  
41  
42 0061-0  
43  
44  
45 3 Karanika S, Karantanos T, Arvanitis M, *et al.* Fecal Colonization With  
46  
47 Extended-spectrum Beta-lactamase–Producing *Enterobacteriaceae* and Risk  
48  
49 Factors Among Healthy Individuals: A Systematic Review and Metaanalysis.  
50  
51 *Clin Infect Dis* 2016;**63**:310–8. doi:10.1093/cid/ciw283  
52  
53  
54 4 Reddy P, Malczynski M, Obias A, *et al.* Screening for Extended-Spectrum -  
55  
56 Lactamase-Producing *Enterobacteriaceae* among High-Risk Patients and Rates  
57  
58 of Subsequent Bacteremia. *Clin Infect Dis* 2007;**45**:846–52.  
59  
60

- 1  
2  
3 doi:10.1086/521260  
4  
5  
6 5 Troché G, Toly L-M, Guibert M, *et al.* Detection and Treatment of Antibiotic-  
7  
8 Resistant Bacterial Carriage in a Surgical Intensive Care Unit: A 6-Year  
9  
10 Prospective Survey. *Infect Control Hosp Epidemiol* 2005;**26**:161–5.  
11  
12 doi:10.1086/502521  
13  
14  
15 6 Coker RJ, Hunter BM, Rudge JW, *et al.* Emerging infectious diseases in  
16  
17 southeast Asia: regional challenges to control. *Lancet* 2011;**377**:599–609.  
18  
19 doi:10.1016/S0140-6736(10)62004-1  
20  
21  
22 7 Zellweger RM, Carrique-Mas J, Limmathurotsakul D, *et al.* A current  
23  
24 perspective on antimicrobial resistance in Southeast Asia. *J Antimicrob*  
25  
26 *Chemother* 2017;**72**:2963–72. doi:10.1093/jac/dkx260  
27  
28  
29 8 Singapore Department of Statistics. Singapore Residents by Planning  
30  
31 Area/Subzone, 2015. 2015.  
32  
33  
34 9 Pan DST, Huang JH, Lee MHM, *et al.* Knowledge, attitudes and practices  
35  
36 towards antibiotic use in upper respiratory tract infections among patients  
37  
38 seeking primary health care in Singapore. *BMC Fam Pract* 2016;**17**:148.  
39  
40 doi:10.1186/s12875-016-0547-3  
41  
42  
43 10 Scaioli G, Gualano MR, Gili R, *et al.* Antibiotic Use: A Cross-Sectional  
44  
45 Survey Assessing the Knowledge, Attitudes and Practices amongst Students of  
46  
47 a School of Medicine in Italy. *PLoS One* 2015;**10**:e0122476.  
48  
49 doi:10.1371/journal.pone.0122476  
50  
51  
52 11 Awad AI, Aboud EA. Knowledge, attitude and practice towards antibiotic use  
53  
54 among the public in Kuwait. *PLoS One* 2015;**10**:e0117910.  
55  
56 doi:10.1371/journal.pone.0117910  
57  
58  
59 12 Huang Y, Gu J, Zhang M, *et al.* Knowledge, attitude and practice of  
60



- 1  
2  
3 antibiotics: a questionnaire study among 2500 Chinese students. *BMC Med*  
4  
5 *Educ* 2013;**13**:163. doi:10.1186/1472-6920-13-163  
6  
7  
8 13 Lv B, Zhou Z, Xu G, *et al.* Knowledge, attitudes and practices concerning self-  
9  
10 medication with antibiotics among university students in western China. *Trop*  
11  
12 *Med Int Heal* 2014;**19**:769–79. doi:10.1111/tmi.12322  
13  
14  
15 14 Teck KC, Ghazi HF, Bin Ahmad MI, *et al.* Knowledge, Attitude, and Practice  
16  
17 of Parents Regarding Antibiotic Usage in Treating Children’s Upper  
18  
19 Respiratory Tract Infection at Primary Health Clinic in Kuala Lumpur,  
20  
21 Malaysia. *Heal Serv Res Manag Epidemiol* 2016;**3**:233339281664372.  
22  
23 doi:10.1177/2333392816643720  
24  
25  
26 15 Hall MA, Zheng B, Dugan E, *et al.* Measuring Patients’ Trust in their Primary  
27  
28 Care Providers. *Med Care Res Rev* 2002;**59**:293–318.  
29  
30 doi:10.1177/1077558702059003004  
31  
32  
33 16 Performance Standards for Antimicrobial Susceptibility Testing An  
34  
35 informational supplement for global application developed through the Clinical  
36  
37 and Laboratory Standards Institute.  
38  
39 <http://ljzx.cqrmhospital.com/upfiles/201601/20160112155335884.pdf>  
40  
41 (accessed 12 Apr 2018).  
42  
43  
44 17 Bankevich A, Nurk S, Antipov D, *et al.* SPAdes: a new genome assembly  
45  
46 algorithm and its applications to single-cell sequencing. *J Comput Biol*  
47  
48 2012;**19**:455–77. doi:10.1089/cmb.2012.0021  
49  
50  
51 18 Wood DE, Salzberg SL. Kraken: ultrafast metagenomic sequence classification  
52  
53 using exact alignments. *Genome Biol* 2014;**15**:R46. doi:10.1186/gb-2014-15-3-  
54  
55 r46  
56  
57  
58 19 Madden T. Chapter 16. The BLAST Sequence Analysis Tool.  
59  
60

- 1  
2  
3 [https://www.ncbi.nlm.nih.gov/books/NBK21097/pdf/Bookshelf\\_NBK21097.p](https://www.ncbi.nlm.nih.gov/books/NBK21097/pdf/Bookshelf_NBK21097.pdf)  
4 [df](https://www.ncbi.nlm.nih.gov/books/NBK21097/pdf/Bookshelf_NBK21097.pdf) (accessed 20 Apr 2018).  
5  
6  
7
- 8 20 Inouye M, Dashnow H, Raven L-A, *et al.* SRST2: Rapid genomic surveillance  
9 for public health and hospital microbiology labs. *Genome Med* 2014;**6**:90.  
10 doi:10.1186/s13073-014-0090-6  
11  
12  
13  
14
- 15 21 R Core Team. A language and environment for statistical computing. 2017.  
16
- 17 22 Young BE, Lye DC, Krishnan P, *et al.* A prospective observational study of the  
18 prevalence and risk factors for colonization by antibiotic resistant bacteria in  
19 patients at admission to hospital in Singapore. *BMC Infect Dis* 2014;**14**:298.  
20 doi:10.1186/1471-2334-14-298  
21  
22  
23  
24
- 25 23 McNulty CAM, Lecky DM, Xu-McCrae L, *et al.* CTX-M ESBL-producing  
26 Enterobacteriaceae: estimated prevalence in adults in England in 2014. *J*  
27 *Antimicrob Chemother* Published Online First: 5 March 2018.  
28 doi:10.1093/jac/dky007  
29  
30  
31  
32  
33  
34
- 35 24 Tängdén T, Cars O, Melhus A, *et al.* Foreign travel is a major risk factor for  
36 colonization with *Escherichia coli* producing CTX-M-type extended-spectrum  
37 beta-lactamases: a prospective study with Swedish volunteers. *Antimicrob*  
38 *Agents Chemother* 2010;**54**:3564–8. doi:10.1128/AAC.00220-10  
39  
40  
41  
42  
43  
44
- 45 25 Woerther P-L, Andremont A, Kantele A. Travel-acquired ESBL-producing  
46 Enterobacteriaceae: impact of colonization at individual and community level.  
47 *J Travel Med* 2017;**24**:S29–34. doi:10.1093/jtm/taw101  
48  
49  
50
- 51 26 Augustine MR, Testerman TL, Justo JA, *et al.* Clinical Risk Score for  
52 Prediction of Extended-Spectrum  $\beta$ -Lactamase-Producing Enterobacteriaceae  
53 in Bloodstream Isolates. *Infect Control Hosp Epidemiol* 2017;**38**:266–72.  
54  
55  
56  
57  
58  
59  
60

- 1  
2  
3 27 Tumbarello M, Treccarichi EM, Bassetti M, *et al.* Identifying Patients  
4  
5 Harboring Extended-Spectrum- $\beta$ -Lactamase-Producing Enterobacteriaceae on  
6  
7 Hospital Admission: Derivation and Validation of a Scoring System.  
8  
9  
10 *Antimicrob Agents Chemother* 2011;**55**:3485–90. doi:10.1128/AAC.00009-11  
11  
12 28 Dautzenberg MJD, Haverkate MR, Bonten MJM, *et al.* Epidemic potential of  
13  
14 Escherichia coli ST131 and Klebsiella pneumoniae ST258: a systematic review  
15  
16 and meta-analysis. *BMJ Open* 2016;**6**:e009971. doi:10.1136/bmjopen-2015-  
17  
18 009971  
19  
20  
21 29 Zhong Y-M, Liu W-E, Liang X-H, *et al.* Emergence and spread of O16-ST131  
22  
23 and O25b-ST131 clones among faecal CTX-M-producing Escherichia coli in  
24  
25 healthy individuals in Hunan Province, China. *J Antimicrob Chemother*  
26  
27 2015;**70**:2223–7. doi:10.1093/jac/dkv114  
28  
29  
30 30 Niumsup PR, Tansawai U, Na-udom A, *et al.* Prevalence and risk factors for  
31  
32 intestinal carriage of CTX-M-type ESBLs in Enterobacteriaceae from a Thai  
33  
34 community. *Eur J Clin Microbiol Infect Dis* 2018;**37**:69–75.  
35  
36 doi:10.1007/s10096-017-3102-9  
37  
38  
39 31 Pitout JDD, DeVinney R. Escherichia coli ST131: a multidrug-resistant clone  
40  
41 primed for global domination. *F1000Research* 2017;**6**.  
42  
43 doi:10.12688/f1000research.10609.1  
44  
45  
46 32 Harris PNA, Ben Zakour NL, Roberts LW, *et al.* Whole genome analysis of  
47  
48 cephalosporin-resistant Escherichia coli from bloodstream infections in  
49  
50 Australia, New Zealand and Singapore: high prevalence of CMY-2 producers  
51  
52 and ST131 carrying blaCTX-M-15 and blaCTX-M-27. *J Antimicrob*  
53  
54 *Chemother* 2018;**73**:634–42. doi:10.1093/jac/dkx466  
55  
56  
57 33 Antibiotic resistance: Multi-country public awareness survey. World Heal.  
58  
59  
60

- 1  
2  
3 Organ.  
4  
5 2016.<http://www.who.int/drugresistance/documents/baselinesurveynov2015/en>  
6  
7 / (accessed 25 Mar 2018).  
8  
9
- 10 34 Lee T-H, Wong JG, Lye DC, *et al.* Medical and psychosocial factors associated  
11 with antibiotic prescribing in primary care: survey questionnaire and factor  
12 analysis. *Br J Gen Pract* 2017;**67**:e168–77. doi:10.3399/bjgp17X688885  
13  
14
- 15 35 Welschen I, Kuyvenhoven M, Hoes A, *et al.* Antibiotics for acute respiratory  
16 tract symptoms: patients' expectations, GPs' management and patient  
17 satisfaction. *Fam Pract*; **21**. doi:10.1093/fampra/cmh303  
18  
19
- 20 36 Davey P, Pagliari C, Hayes A. The patient's role in the spread and control of  
21 bacterial resistance to antibiotics. *Clin Microbiol Infect* 2002;**8**:43–68.  
22 doi:10.1046/J.1469-0691.8.S.2.6.X  
23  
24
- 25 37 McNulty CAM, Cookson BD, Lewis MAO. Education of healthcare  
26 professionals and the public. *J Antimicrob Chemother* 2012;**67**:i11–8.  
27 doi:10.1093/jac/dks199  
28  
29
- 30 38 Little P, Stuart B, Francis N, *et al.* Effects of internet-based training on  
31 antibiotic prescribing rates for acute respiratory-tract infections: a  
32 multinational, cluster, randomised, factorial, controlled trial. *Lancet*  
33 2013;**382**:1175–82. doi:10.1016/S0140-6736(13)60994-0  
34  
35
- 36 39 UK Five Year Antimicrobial Resistance Strategy 2013 to 2018.  
37 [https://assets.publishing.service.gov.uk/government/uploads/system/uploads/att](https://assets.publishing.service.gov.uk/government/uploads/system/uploads/attachment_data/file/244058/20130902_UK_5_year_AMR_strategy.pdf)  
38  
39  
40  
41  
42  
43  
44  
45  
46  
47  
48  
49  
50  
51  
52  
53  
54  
55  
56  
57  
58  
59  
60
- 40 WHO Global Strategy for Containment of Antimicrobial Resistance WHO  
Global Strategy for Containment of Antimicrobial Resistance. World Heal.

- 1  
2  
3 Organ. [http://www.who.int/drugresistance/WHO\\_Global\\_Strategy\\_English.pdf](http://www.who.int/drugresistance/WHO_Global_Strategy_English.pdf)  
4  
5 (accessed 5 Apr 2018).  
6  
7  
8 41 Llewelyn MJ, Fitzpatrick JM, Darwin E, *et al.* The antibiotic course has had its  
9  
10 day. *BMJ* 2017;;j3418. doi:10.1136/bmj.j3418  
11  
12 42 Antibiotics and antibiotic resistance. NPS MedicineWise.  
13  
14 2018.[https://www.nps.org.au/medical-info/consumer-info/antibiotic-resistance-](https://www.nps.org.au/medical-info/consumer-info/antibiotic-resistance-the-facts)  
15  
16 the-facts (accessed 10 Apr 2018).  
17  
18  
19 43 Consumer Updates - Combating Antibiotic Resistance.  
20  
21 2018.<https://www.fda.gov/ForConsumers/ConsumerUpdates/ucm092810.htm>  
22  
23 (accessed 10 Apr 2018).  
24  
25  
26 44 Factsheet for the general public - Antimicrobial resistance.  
27  
28 [https://ecdc.europa.eu/en/antimicrobial-resistance/facts/factsheets/general-](https://ecdc.europa.eu/en/antimicrobial-resistance/facts/factsheets/general-public)  
29  
30 public (accessed 10 Apr 2018).  
31  
32  
33  
34  
35  
36  
37  
38  
39  
40  
41  
42  
43  
44  
45  
46  
47  
48  
49  
50  
51  
52  
53  
54  
55  
56  
57  
58  
59  
60



Figure S1. Participant recruitment flowchart

90x87mm (300 x 300 DPI)

Table S1. Study questionnaire

## Section 1: Background Data

1. Demographic Data
  - 1.1 Age
  - 1.2 Gender - Male or Female
2. Race - Chinese or Malay or Indian or Others
3. Educational Background
  - 2.1 Highest Education Level Attained- Primary Education or Secondary Education or Tertiary Education or Graduate Education or No formal education
4. Have you ever studied a healthcare-related course? (Medicine, Traditional Chinese Medicine, Therapy, Nursing) - Yes or No
- 3 Occupation and Financial Status
5. Occupation:
  - 4 Accommodation
    - 4.1 Housing type- Public housing (1-Room or 2-Room or 3-Room or 4-Room or 5-Room or Executive Apartment) or Landed property
    - 4.2 How many occupants are there living in your house? (including you) Number of Occupants:
      - 4.3.1 How many people in the household are in the following age group? Less than 12 years old:
      - 4.3.2 How many people in the household are in the following age group? More than 65 years old:
6. Do you currently have any dogs or cats at home? - Yes or No
- 5 Travel history

1  
2  
3 5.3 Have you travelled to the following places within the past 6 months? – Yes or

4  
5 No

6  
7  
8 5.3.1 If yes, which of the following places have you been to? (You may select more  
9  
10 than 1 option) - Southeast Asia (Malaysia, Thailand, Indonesia, Vietnam,  
11  
12 Cambodia etc) and/ or South Asia (India, Bangladesh, Sri Lanka) and/ or East  
13  
14 Asia (China, Korea, Japan) and/ or Europe and/ or South America and/ or  
15  
16 North America and/ or Middle East or Others:

17  
18  
19 5.4 Have you lived anywhere else for more than 1 year? – Yes or No

20  
21  
22 6 If yes, did you live in the following areas? (You may select more than 1 option) -  
23  
24 Southeast Asia (Malaysia, Thailand, Indonesia, Vietnam, Cambodia etc) and/ or  
25  
26 South Asia (India, Bangladesh, Sri Lanka) and/ or East Asia (China, Korea,  
27  
28 Japan) and/ or Europe and/ or South America and/ or North America and/ or  
29  
30 Middle East or Others:

31  
32  
33 7 Medical History

34  
35 6.1 Do you have any of the following? (You can choose more than one of the  
36  
37 following) - Diabetes Mellitus and/ or Medications (Chemotherapy, Steroids,  
38  
39 Immunosuppressants etc) and/ or Other medical conditions or None of the above

40  
41  
42 6.2 When was your last hospitalisation? - Never been hospitalised before or  
43  
44 Hospitalised before

45  
46  
47 6.2.1 If yes, was this hospitalisation within the past 1 year? – Yes or No

48  
49 6.2.2 How long was your stay? Duration:

50  
51  
52 6.3 Have you used antibiotics before? - Have never used antibiotics before or Used  
53  
54 antibiotics before

55  
56 6.3.1 If yes, when was the last time you started on antibiotics? - Within the last 6  
57  
58  
59  
60



months or More than 6 months ago

## Section 2: Assessment of Antibiotic Practices

### 1. Assessing Health-Seeking and Antibiotic-Seeking Behaviours

#### Scenario 1: Cough and Runny Nose

1.1.1 Would you go to the doctor for a cough and runny nose that lasted less than 1 week? – Yes or No or I am not sure

1.1.2 In the above scenario, did you expect the doctor to prescribe antibiotics to help with the recovery? – Yes or No or I am not sure

1.1.3 If the doctor you were seeing does not prescribe you antibiotics for the symptoms above, would you seek another doctor's opinion or firmly request the doctor for an antibiotic prescription? – Yes or No or I am not sure

#### Scenario 2: Diarrhoea and Vomiting

1.2.1 Would you go to the doctor for diarrhoea, vomiting and stomach pain that lasted less than a week? – Yes or No or I am not sure

1.2.2 In the above scenario, did you expect the doctor to prescribe antibiotics to help with the recovery? – Yes or No or I am not sure

1.2.3 If the doctor you were seeing does not prescribe you antibiotics for the symptoms above, would you seek another doctor's opinion or firmly request the doctor for an antibiotic prescription? – Yes or No or I am not sure

### 2. Assessing Practices of Disposal and Storage of Antibiotics

2.1 What do you usually do with leftover antibiotics? - Usually do not have leftovers

1  
2  
3 or Keep it for future use or Pour it down a sink or toilet bowl or Disposal in the  
4 rubbish bin or Others:  
5  
6

7  
8  
9 **3. Assessing Alternative Antibiotic Practices**

10  
11 **3.1** Have you ever shared antibiotics with someone else? – Yes or No

12  
13  
14 **3.2** Have you ever taken leftover antibiotics from a previous course of illness? – Yes  
15 or No  
16  
17  
18  
19

20  
21  
22  
23 **Section 3: Attitude Assessment**

24  
25  
26 **1. Attitudes Towards Healthcare Provider Prescription**

27  
28 **1.1** Sometimes my doctor prioritises what is beneficial for him over my medical  
29 needs. – Strongly agree or Agree or Neutral or Disagree or Strongly Disagree  
30

31  
32 **1.2** My doctor's medical skills are not as good as they should be. – Strongly agree or  
33 Agree or Neutral or Disagree or Strongly Disagree  
34

35  
36 **1.3** My doctor is always honest when telling me about all the available treatments for  
37 my condition. – Strongly agree or Agree or Neutral or Disagree or Strongly  
38 Disagree  
39  
40  
41

42  
43 **1.4** I have no worries about putting my life in my doctor's hands. – Strongly agree or  
44 Agree or Neutral or Disagree or Strongly Disagree  
45  
46  
47

48  
49 **2. Attitudes Towards Potential Educational Interventions**

50  
51 **2.1** Which of the following sources of medical information do you trust most? -

52  
53 Healthcare Professionals' Advice (Doctors, nurses, clinical assistants, therapists)  
54 or Family and Friends or Online Medical Sources or Television Programmes and  
55 Advertisements or Radio Programmes and Advertisements  
56  
57  
58  
59  
60

## Section 4: Knowledge Assessment

## 1. Knowledge on Function of Antibiotics

1.1 Antibiotics are medicines that can treat viral infections. – True or False or I am not sure

1.2 Antibiotics are medicines that can treat bacterial infections. – True or False or I am not sure

1.3 Antibiotics are medicines that can treat fungal infections. – True or False or I am not sure

## 2. Knowledge on Agents of Infection

2.1 Which of the following most commonly causes running nose and cough? – Virues or Bacteria or I am not sure

2.2 Which of the following most commonly causes diarrhoea? – Virues or Bacteria or I am not sure

## 3. Knowledge on Proper Use of Antibiotics

3.1 Antibiotics can be obtained at the pharmacist without any prescription. - True or False or I am not sure

3.2 Antibiotics can be stopped when: - You start to feel better or You finish the entire course or You head back to the doctor and he tells you that you can stop

## 4. Knowledge on Concept of Antibiotic Resistance

4.1 Do you understand what is antibiotic resistance? – Yes or No or I am unsure

4.1.1 If yes, describe what causes antibiotic resistance?

4.2 Which of the following is a consequence of antibiotic resistance? (choose only ONE option) - Antibiotics become more effective at treating infections or Antibiotics become less effective at treating infections or Your body immunity

1  
2  
3 becomes weaker or Your body immunity becomes stronger  
4

5 4.3 Antimicrobial resistance is not present in Singapore yet. – Yes or No or I am  
6

7  
8 unsure  
9  
10  
11  
12  
13  
14  
15  
16  
17  
18  
19  
20  
21  
22  
23  
24  
25  
26  
27  
28  
29  
30  
31  
32  
33  
34  
35  
36  
37  
38  
39  
40  
41  
42  
43  
44  
45  
46  
47  
48  
49  
50  
51  
52  
53  
54  
55  
56  
57  
58  
59  
60

For peer review only

Table S2. Assessment of knowledge

| Questions |                                                                         |                              | N (%)        |
|-----------|-------------------------------------------------------------------------|------------------------------|--------------|
|           |                                                                         |                              | Total N= 693 |
| 2.1.1     | Antibiotics are medicines that can treat viral infections.              | False                        | 149 (21.5%)  |
|           |                                                                         | True                         | 335 (48.3%)  |
|           |                                                                         | Unsure                       | 209 (30.2%)  |
| 2.1.2     | Antibiotics are medicines that can treat bacterial infections.          | True                         | 419 (60.5%)  |
|           |                                                                         | False                        | 50 (7.2%)    |
|           |                                                                         | Unsure                       | 224 (32.3%)  |
| 2.1.3     | Antibiotics are medicines that can treat fungal infections.             | False                        | 157 (22.7%)  |
|           |                                                                         | True                         | 194 (28.0%)  |
|           |                                                                         | Unsure                       | 342 (49.4%)  |
| 2.1.4     | Which of the following most commonly causes running nose and cough.     | Viruses                      | 352 (50.8%)  |
|           |                                                                         | Bacteria                     | 130 (18.8%)  |
|           |                                                                         | Unsure                       | 211 (30.4%)  |
| 2.1.5     | Which of the following most commonly causes diarrhoea?                  | Viruses                      | 98 (14.1%)   |
|           |                                                                         | Bacteria                     | 385 (55.6%)  |
|           |                                                                         | Unsure                       | 210 (30.3%)  |
| 2.1.6     | Antibiotics can be stopped when...                                      | You finish the entire course | 554 (79.9%)  |
|           |                                                                         | When you feel better         | 95 (13.7%)   |
|           |                                                                         | Consult the doctor           | 44 (6.3%)    |
| 2.1.7     | Antibiotics can be obtained at the pharmacist without any prescription. | False                        | 564 (81.4%)  |
|           |                                                                         | True                         | 29 (4.2%)    |
|           |                                                                         | Unsure                       | 100 (14.4%)  |

|                                                                                                                                                          |        |                                                                   |                                                            |             |
|----------------------------------------------------------------------------------------------------------------------------------------------------------|--------|-------------------------------------------------------------------|------------------------------------------------------------|-------------|
| 1<br>2<br>3<br>4<br>5<br>6<br>7<br>8<br>9                                                                                                                | 2.1.8  | What causes antimicrobial resistance?<br>(Open ended)             | Inappropriate use of antibiotics                           | 121 (17.5%) |
|                                                                                                                                                          |        |                                                                   | Wrong or unsure                                            | 572 (82.5%) |
| 10<br>11<br>12<br>13<br>14<br>15<br>16<br>17<br>18<br>19<br>20<br>21<br>22<br>23<br>24<br>25<br>26<br>27<br>28<br>29<br>30<br>31<br>32<br>33<br>34       | 2.1.9  | Which of the following is a consequence of antibiotic resistance? | Antibiotics becoming more effective at treating infections | 280 (40.4%) |
|                                                                                                                                                          |        |                                                                   | Antibiotics becoming less effective at treating infections | 111 (16.0%) |
|                                                                                                                                                          |        |                                                                   | Your body immunity becomes weaker                          | 235 (33.9%) |
|                                                                                                                                                          |        |                                                                   | Your body immunity becomes stronger                        | 67 (9.7%)   |
| 35<br>36<br>37<br>38<br>39<br>40<br>41<br>42<br>43<br>44<br>45<br>46<br>47<br>48<br>49<br>50<br>51<br>52<br>53<br>54<br>55<br>56<br>57<br>58<br>59<br>60 | 2.1.10 | Antibiotic resistance is not present in Singapore yet.            | False                                                      | 255 (36.8%) |
|                                                                                                                                                          |        |                                                                   | True                                                       | 77 (11.1%)  |
|                                                                                                                                                          |        |                                                                   | Unsure                                                     | 361 (52.1%) |

Table S3. Assessment of attitude toward primary care

| Questions |                                                                                                |                                  | N (%)      |
|-----------|------------------------------------------------------------------------------------------------|----------------------------------|------------|
|           |                                                                                                |                                  | N= 693     |
| 2.2.1     | Sometimes my doctor prioritises what is beneficial for him over my medical needs               | Strongly agree                   | 14 (2.0)   |
|           |                                                                                                | Agree                            | 109 (15.7) |
|           |                                                                                                | Neutral                          | 145 (20.9) |
|           |                                                                                                | Disagree                         | 335 (48.3) |
|           |                                                                                                | Strongly disagree                | 90 (13.0)  |
| 2.2.2     | My doctor's medical skills are not as good as they should be                                   | Strongly agree                   | 10 (1.4)   |
|           |                                                                                                | Agree                            | 83 (12.0)  |
|           |                                                                                                | Neutral                          | 150 (21.6) |
|           |                                                                                                | Disagree                         | 373 (53.8) |
|           |                                                                                                | Strongly disagree                | 77 (11.1)  |
| 2.2.3     | My doctor is always honest when telling me about all the available treatments for my condition | Strongly agree                   | 100 (14.4) |
|           |                                                                                                | Agree                            | 427 (61.6) |
|           |                                                                                                | Neutral                          | 115 (16.6) |
|           |                                                                                                | Disagree                         | 45 (6.5)   |
|           |                                                                                                | Strongly disagree                | 6 (0.9)    |
| 2.2.4     | I have no worries about putting my life in my doctor's hands                                   | Strongly agree                   | 110 (15.9) |
|           |                                                                                                | Agree                            | 363 (52.4) |
|           |                                                                                                | Neutral                          | 135 (19.5) |
|           |                                                                                                | Disagree                         | 74 (10.7)  |
|           |                                                                                                | Strongly disagree                | 11 (1.6)   |
| 2.2.5     | Which of the following sources of medical information do you trust most?                       | Healthcare professional's advice | 627 (90.6) |
|           |                                                                                                | Family and friends               | 36 (5.2)   |
|           |                                                                                                | Online medical sources           | 24 (3.5)   |

|  |  |                                          |         |
|--|--|------------------------------------------|---------|
|  |  | Television programmes and advertisements | 4 (0.6) |
|  |  | Radio programmes and advertisements      | 1 (0.1) |

For peer review only



Table S4. Assessment of practices

| Questions |                                                                                                                                                                                                                                            |                         | N (%)        |
|-----------|--------------------------------------------------------------------------------------------------------------------------------------------------------------------------------------------------------------------------------------------|-------------------------|--------------|
|           |                                                                                                                                                                                                                                            |                         | Total N= 693 |
| 2.3.1.1   | Would you go to the doctor for a cough and runny nose that lasted less than 1 week                                                                                                                                                         | Yes                     | 294 (42.4)   |
|           |                                                                                                                                                                                                                                            | No                      | 377 (54.4)   |
|           |                                                                                                                                                                                                                                            | Unsure                  | 22 (3.2)     |
| 2.3.1.2   | Would you go to the doctor for diarrhoea, vomiting and stomach pain that lasted less than 1 week?                                                                                                                                          | Yes                     | 414 (59.7)   |
|           |                                                                                                                                                                                                                                            | No                      | 262 (37.8)   |
|           |                                                                                                                                                                                                                                            | Unsure                  | 17 (2.5)     |
| 2.3.2.1   | Would you expect the doctor to prescribe antibiotics for cough and runny nose that lasted less than 1 week to help with the recovery?                                                                                                      | Yes                     | 136 (19.6)   |
|           |                                                                                                                                                                                                                                            | No                      | 508 (73.3)   |
|           |                                                                                                                                                                                                                                            | Unsure                  | 49 (7.1)     |
| 2.3.2.2   | Would you expect the doctor to prescribe antibiotics for diarrhoea, vomiting and stomach pain that lasted less than 1 week to help with the recovery?                                                                                      | Yes                     | 120 (17.3)   |
|           |                                                                                                                                                                                                                                            | No                      | 501 (72.3)   |
|           |                                                                                                                                                                                                                                            | Unsure                  | 72 (10.4)    |
| 2.3.3.1   | If the doctor you were seeing does not prescribe you antibiotics for cough and runny nose that lasted less than 1 week, would you seek another doctor's opinion or firmly request the doctor for an antibiotic prescription?               | Yes                     | 37 (5.3)     |
|           |                                                                                                                                                                                                                                            | No                      | 619 (89.3)   |
|           |                                                                                                                                                                                                                                            | Unsure                  | 37 (5.3)     |
| 2.3.3.2   | If the doctor you were seeing does not prescribe you antibiotics for diarrhea vomiting and stomach pain that lasted less than 1 week, would you seek another doctor's opinion or firmly request the doctor for an antibiotic prescription? | Yes                     | 40 (5.8)     |
|           |                                                                                                                                                                                                                                            | No                      | 615 (88.7)   |
|           |                                                                                                                                                                                                                                            | Unsure                  | 38 (5.5)     |
| 2.3.4.1   | What do you usually do with left over antibiotics?                                                                                                                                                                                         | No left overs           | 476 (68.7)   |
|           |                                                                                                                                                                                                                                            | Disposal in rubbish bin | 130 (18.8)   |
|           |                                                                                                                                                                                                                                            | Keep for future use     | 60 (8.7)     |

|         |                                                                             |                               |            |
|---------|-----------------------------------------------------------------------------|-------------------------------|------------|
|         |                                                                             | Unsure                        | 19 (2.7)   |
|         |                                                                             | Pour down sink or toilet bowl | 8 (1.2)    |
| 2.3.4.2 | Have you ever shared antibiotics with anyone else?                          | Yes                           | 23 (3.3)   |
|         |                                                                             | No                            | 670 (94.5) |
| 2.3.4.3 | Have you ever taken leftover antibiotics from a previous course of illness? | Yes                           | 38 (5.5)   |
|         |                                                                             | No                            | 655 (9.5)  |

Table S5. Molecular classification of ceftriaxone-resistant *E coli* isolates

|                                           | <i>E coli</i>     |                       |               | p-value |
|-------------------------------------------|-------------------|-----------------------|---------------|---------|
|                                           | N=71 (%)          |                       |               |         |
|                                           | ST131<br>N=11 (%) | Non ST131<br>N=60 (%) |               |         |
| Number of resistant genes (mean $\pm$ sd) |                   | 1.2 $\pm$ 0.4         | 1.9 $\pm$ 0.8 | 0.0012  |
| ESBL genes                                |                   |                       |               |         |
| CTXM                                      | 15                | 4 (36.4)              | 17 (28.3)     | 0.72    |
|                                           | 27                | 7 (63.6)              | 9 (15.0)      |         |
|                                           | 14                | 0 (0.0)               | 10 (16.7)     |         |
|                                           | 55                | 0 (0.0)               | 9 (15.0)      |         |
|                                           | 8                 | 0 (0.0)               | 3 (5.0)       |         |
|                                           | Others            | 0 (0.0)               | 9 (15.0)      |         |
|                                           | None              | 0 (0.0)               | 3 (5.0)       |         |
| SHV                                       | 12                | 0 (0.0)               | 3 (5.0)       | 1.0     |
|                                           | None              | 11 (100.0)            | 57 (95.0)     |         |
| TEM                                       | 206               | 1 (9.1)               | 11 (18.3)     | 0.11    |
|                                           | 198               | 0 (0.0)               | 3 (5.0)       |         |
|                                           | Others            | 0 (0.0)               | 15 (25.0)     |         |

|                      |      |           |           |       |
|----------------------|------|-----------|-----------|-------|
|                      | None | 10 (90.9) | 31 (51.7) |       |
| OXA                  |      | 1 (9.1)   | 3 (5.0)   | 1.0   |
| Quinolone resistance |      | 8 (72.7)  | 21 (35.0) | 0.041 |

\* Non-ST131 sequence types are: 38 (N=8), 1193 (N=5), 10 (N=4), 48 (N=3), other (N=35), none (N=5)

For peer review only

**STROBE 2007 (v4) checklist of items to be included in reports of observational studies in epidemiology\***  
**Checklist for cohort, case-control, and cross-sectional studies (combined)**

| Section/Topic             | Item # | Recommendation                                                                                                                                                                                                                                                                                                                                                                                                                                                         | Reported on page # |
|---------------------------|--------|------------------------------------------------------------------------------------------------------------------------------------------------------------------------------------------------------------------------------------------------------------------------------------------------------------------------------------------------------------------------------------------------------------------------------------------------------------------------|--------------------|
| Title and abstract        | 1      | (a) Indicate the study's design with a commonly used term in the title or the abstract                                                                                                                                                                                                                                                                                                                                                                                 | 2                  |
|                           |        | (b) Provide in the abstract an informative and balanced summary of what was done and what was found                                                                                                                                                                                                                                                                                                                                                                    | 2                  |
| <b>Introduction</b>       |        |                                                                                                                                                                                                                                                                                                                                                                                                                                                                        |                    |
| Background/rationale      | 2      | Explain the scientific background and rationale for the investigation being reported                                                                                                                                                                                                                                                                                                                                                                                   | 4                  |
| Objectives                | 3      | State specific objectives, including any pre-specified hypotheses                                                                                                                                                                                                                                                                                                                                                                                                      | 4                  |
| <b>Methods</b>            |        |                                                                                                                                                                                                                                                                                                                                                                                                                                                                        |                    |
| Study design              | 4      | Present key elements of study design early in the paper                                                                                                                                                                                                                                                                                                                                                                                                                | 4-8                |
| Setting                   | 5      | Describe the setting, locations, and relevant dates, including periods of recruitment, exposure, follow-up, and data collection                                                                                                                                                                                                                                                                                                                                        | 4-5                |
| Participants              | 6      | (a) <i>Cohort study</i> —Give the eligibility criteria, and the sources and methods of selection of participants. Describe methods of follow-up<br><i>Case-control study</i> —Give the eligibility criteria, and the sources and methods of case ascertainment and control selection. Give the rationale for the choice of cases and controls<br><i>Cross-sectional study</i> —Give the eligibility criteria, and the sources and methods of selection of participants | 4-5                |
|                           |        | (b) <i>Cohort study</i> —For matched studies, give matching criteria and number of exposed and unexposed<br><i>Case-control study</i> —For matched studies, give matching criteria and the number of controls per case                                                                                                                                                                                                                                                 | NA                 |
| Variables                 | 7      | Clearly define all outcomes, exposures, predictors, potential confounders, and effect modifiers. Give diagnostic criteria, if applicable                                                                                                                                                                                                                                                                                                                               | 5-7                |
| Data sources/ measurement | 8*     | For each variable of interest, give sources of data and details of methods of assessment (measurement). Describe comparability of assessment methods if there is more than one group                                                                                                                                                                                                                                                                                   | 4-8                |
| Bias                      | 9      | Describe any efforts to address potential sources of bias                                                                                                                                                                                                                                                                                                                                                                                                              | 4-5                |
| Study size                | 10     | Explain how the study size was arrived at                                                                                                                                                                                                                                                                                                                                                                                                                              | 4-5                |
| Quantitative variables    | 11     | Explain how quantitative variables were handled in the analyses. If applicable, describe which groupings were chosen and why                                                                                                                                                                                                                                                                                                                                           | 7-8                |
| Statistical methods       | 12     | (a) Describe all statistical methods, including those used to control for confounding                                                                                                                                                                                                                                                                                                                                                                                  | 7-8                |
|                           |        | (b) Describe any methods used to examine subgroups and interactions                                                                                                                                                                                                                                                                                                                                                                                                    | 7-8                |
|                           |        | (c) Explain how missing data were addressed                                                                                                                                                                                                                                                                                                                                                                                                                            | NA                 |
|                           |        | (d) <i>Cohort study</i> —If applicable, explain how loss to follow-up was addressed<br><i>Case-control study</i> —If applicable, explain how matching of cases and controls was addressed                                                                                                                                                                                                                                                                              | 4-5                |

|                          |     |                                                                                                                                                                                                              |                        |
|--------------------------|-----|--------------------------------------------------------------------------------------------------------------------------------------------------------------------------------------------------------------|------------------------|
|                          |     | <i>Cross-sectional study</i> —If applicable, describe analytical methods taking account of sampling strategy                                                                                                 |                        |
|                          |     | (e) Describe any sensitivity analyses                                                                                                                                                                        | NA                     |
| <b>Results</b>           |     |                                                                                                                                                                                                              |                        |
| Participants             | 13* | (a) Report numbers of individuals at each stage of study—eg numbers potentially eligible, examined for eligibility, confirmed eligible, included in the study, completing follow-up, and analysed            | 8                      |
|                          |     | (b) Give reasons for non-participation at each stage                                                                                                                                                         | 8                      |
|                          |     | (c) Consider use of a flow diagram                                                                                                                                                                           | Supplementary material |
| Descriptive data         | 14* | (a) Give characteristics of study participants (eg demographic, clinical, social) and information on exposures and potential confounders                                                                     | 8-9                    |
|                          |     | (b) Indicate number of participants with missing data for each variable of interest                                                                                                                          | NA                     |
|                          |     | (c) <i>Cohort study</i> —Summarise follow-up time (eg, average and total amount)                                                                                                                             | NA                     |
| Outcome data             | 15* | <i>Cohort study</i> —Report numbers of outcome events or summary measures over time                                                                                                                          | NA                     |
|                          |     | <i>Case-control study</i> —Report numbers in each exposure category, or summary measures of exposure                                                                                                         | NA                     |
|                          |     | <i>Cross-sectional study</i> —Report numbers of outcome events or summary measures                                                                                                                           | 9-15                   |
| Main results             | 16  | (a) Give unadjusted estimates and, if applicable, confounder-adjusted estimates and their precision (eg, 95% confidence interval). Make clear which confounders were adjusted for and why they were included | 9-15                   |
|                          |     | (b) Report category boundaries when continuous variables were categorized                                                                                                                                    | 9-15                   |
|                          |     | (c) If relevant, consider translating estimates of relative risk into absolute risk for a meaningful time period                                                                                             | NA                     |
| Other analyses           | 17  | Report other analyses done—eg analyses of subgroups and interactions, and sensitivity analyses                                                                                                               | 9-15                   |
| <b>Discussion</b>        |     |                                                                                                                                                                                                              |                        |
| Key results              | 18  | Summarise key results with reference to study objectives                                                                                                                                                     | 15-17                  |
| Limitations              | 19  | Discuss limitations of the study, taking into account sources of potential bias or imprecision. Discuss both direction and magnitude of any potential bias                                                   | 17                     |
| Interpretation           | 20  | Give a cautious overall interpretation of results considering objectives, limitations, multiplicity of analyses, results from similar studies, and other relevant evidence                                   | 15-17                  |
| Generalisability         | 21  | Discuss the generalisability (external validity) of the study results                                                                                                                                        | 15-17                  |
| <b>Other information</b> |     |                                                                                                                                                                                                              |                        |
| Funding                  | 22  | Give the source of funding and the role of the funders for the present study and, if applicable, for the original study on which the present article is based                                                | 19-20                  |

\*Give information separately for cases and controls in case-control studies and, if applicable, for exposed and unexposed groups in cohort and cross-sectional studies.

1  
2  
3  
4 **Note:** An Explanation and Elaboration article discusses each checklist item and gives methodological background and published examples of transparent reporting. The STROBE  
5 checklist is best used in conjunction with this article (freely available on the Web sites of PLoS Medicine at <http://www.plosmedicine.org/>, Annals of Internal Medicine at  
6 <http://www.annals.org/>, and Epidemiology at <http://www.epidem.com/>). Information on the STROBE Initiative is available at [www.strobe-statement.org](http://www.strobe-statement.org).  
7  
8  
9  
10  
11  
12  
13  
14  
15  
16  
17  
18  
19  
20  
21  
22  
23  
24  
25  
26  
27  
28  
29  
30  
31  
32  
33  
34  
35  
36  
37  
38  
39  
40  
41  
42  
43  
44  
45  
46  
47

For peer review only

# BMJ Open

## Relating knowledge, attitude and practice of antibiotic use to extended spectrum beta-Lactamase producing Enterobacteriaceae carriage – results of a cross-sectional community survey

|                                 |                                                                                                                                                                                                                                                                                                                                                                                                                                                                                                                                                                                                                                                                                                                                                                                                                                                                                                                                                                |
|---------------------------------|----------------------------------------------------------------------------------------------------------------------------------------------------------------------------------------------------------------------------------------------------------------------------------------------------------------------------------------------------------------------------------------------------------------------------------------------------------------------------------------------------------------------------------------------------------------------------------------------------------------------------------------------------------------------------------------------------------------------------------------------------------------------------------------------------------------------------------------------------------------------------------------------------------------------------------------------------------------|
| Journal:                        | <i>BMJ Open</i>                                                                                                                                                                                                                                                                                                                                                                                                                                                                                                                                                                                                                                                                                                                                                                                                                                                                                                                                                |
| Manuscript ID                   | bmjopen-2018-023859.R3                                                                                                                                                                                                                                                                                                                                                                                                                                                                                                                                                                                                                                                                                                                                                                                                                                                                                                                                         |
| Article Type:                   | Research                                                                                                                                                                                                                                                                                                                                                                                                                                                                                                                                                                                                                                                                                                                                                                                                                                                                                                                                                       |
| Date Submitted by the Author:   | 28-Jan-2019                                                                                                                                                                                                                                                                                                                                                                                                                                                                                                                                                                                                                                                                                                                                                                                                                                                                                                                                                    |
| Complete List of Authors:       | Mo, Yin; National University Health System, Division of Infectious Diseases, University Medicine Cluster; Mahidol Oxford Tropical Medicine Research Unit<br>Seah, Ivan; National University Singapore Yong Loo Lin School of Medicine<br>Lye, Pei Shi Priscillia ; National University Singapore Yong Loo Lin School of Medicine<br>Kee, Xiang Lee Jamie ; National University Singapore Yong Loo Lin School of Medicine<br>Wong, Kien Yee Michael; National University Singapore Yong Loo Lin School of Medicine<br>Ko, Kwan Ki Karrie ; Singapore General Hospital, Department of Microbiology<br>Ong, Rick Twee-Hee ; National University Singapore Saw Swee Hock School of Public Health<br>Tambyah, Paul; National University Health System, Division of Infectious Diseases, University Medicine Cluster; National University of Singapore, Department of Medicine<br>Cook, Alex R ; National University Singapore Saw Swee Hock School of Public Health |
| <b>Primary Subject Heading</b>: | Infectious diseases                                                                                                                                                                                                                                                                                                                                                                                                                                                                                                                                                                                                                                                                                                                                                                                                                                                                                                                                            |
| Secondary Subject Heading:      | Public health, Epidemiology                                                                                                                                                                                                                                                                                                                                                                                                                                                                                                                                                                                                                                                                                                                                                                                                                                                                                                                                    |
| Keywords:                       | Extended-spectrum beta-lactamase producing Enterobacteriaceae, Antimicrobial resistance, Duration of antibiotic treatment                                                                                                                                                                                                                                                                                                                                                                                                                                                                                                                                                                                                                                                                                                                                                                                                                                      |
|                                 |                                                                                                                                                                                                                                                                                                                                                                                                                                                                                                                                                                                                                                                                                                                                                                                                                                                                                                                                                                |

SCHOLARONE™  
Manuscripts

1  
2  
3 Relating knowledge, attitude and practice of antibiotic use to extended spectrum beta-  
4 lactamase producing *Enterobacteriaceae* carriage – results of a cross-sectional  
5  
6  
7  
8 community Survey  
9

10  
11  
12  
13  
14 Yin MO<sup>1, 2, 3\*</sup>, Ivan SEAH<sup>4\*</sup>, Pei Shi Priscillia LYE<sup>4</sup>, Xiang Lee Jamie KEE<sup>4</sup>, Kien  
15  
16  
17 Yee Michael WONG<sup>4</sup>, Kwan Ki Karrie KO<sup>5</sup>, Rick Twee-Hee ONG<sup>6</sup>, Paul  
18  
19 Anantharajah TAMBYAH<sup>1, 2</sup>, Alex R COOK<sup>6</sup>  
20  
21  
22  
23  
24  
25

26 1. Division of Infectious Disease, University Medicine Cluster, National University  
27  
28 Hospital, 5 Lower Kent Ridge Road Singapore 119074; 2. Department of Medicine,  
29  
30 National University of Singapore, 21 Lower Kent Ridge Road Singapore 119077; 3.  
31  
32 Mahidol Oxford Tropical Medicine Research Unit, 420/6 Rajvithi Road,  
33  
34 Tunphyathai, Bangkok 10400; 4. Yong Loo Lin School of Medicine, 1E Kent Ridge  
35  
36 Road Singapore 119228; 5. Department of Microbiology, Singapore General  
37  
38 Hospital, Outram Road Singapore 169608; 6. Saw Swee Hock School of Public  
39  
40 Health, National University of Singapore, 21 Lower Kent Ridge Road Singapore  
41  
42 119077  
43  
44  
45  
46  
47  
48

49 \* Authors contributed to this work equally.  
50  
51  
52  
53

54 Correspondence to: Yin Mo [yin\\_mo@nuhs.edu.sg](mailto:yin_mo@nuhs.edu.sg) +65 67795555  
55  
56  
57

58 Word count: 2736  
59  
60



## ABSTRACT

Objectives: To study the correlation between knowledge, attitude and practices (KAP) of antibiotic consumption with epidemiology and molecular characteristics of ESBL-producing *Enterobacteriaceae* (ESBL-PE) carriage, in order to identify modifiable factors and public health interventions to reduce prevalence of multidrug resistant organism (MDRO) colonisation in the community.

Design: Cross-sectional questionnaire of KAP towards antibiotic use and collection of stool samples or rectal swabs. ESBL-PE isolates obtained underwent whole genome sequencing to identify resistance genes.

Setting: A densely populated community in Singapore

Participants: There were 693 healthy community-dwelling questionnaire respondents. Out of which, 305 provided stool samples or rectal swabs.

Results: The overall knowledge of antibiotic use was poor (mean score 4.6/10, IQR 3.0-6.0). 80 participants (80/305, 26.2%) carried at least one ESBL-PE isolate. The most common ESBL-PE was *E. coli* sequence type 131 carrying CTX-M type beta-lactamases (11/71, 15.5%). Living overseas for more than 1 year (OR 3.3, 95% CI 1.6 to 6.9) but not short-term travel, recent hospitalisation or antibiotic intake was associated with ESBL-PE carriage. Interestingly, higher knowledge scores (OR 2.0, 95%CI 1.03 to 3.9) and having no left over antibiotics (OR 2.4, 95%CI 1.2 to 4.9) were independent factors associated with ESBL-PE carriage in the multivariate logistic regression model.

Conclusions: While the role of trans-border transmission of antimicrobial resistance is well known, we may have to examine the current recommendation that all antibiotics courses have to be completed. Clinical trials to determine the optimum duration of treatment for common infections are critically important.

1  
2  
3 (246 words)  
4  
5  
6  
7

## 8 **ARTICLE SUMMARY**

### 9 **Strengths and limitations of this study**

- 10  
11  
12
- 13 • Based on individual-level data, we adopted a novel approach of correlating  
14 knowledge, attitude and practice of antibiotic use with asymptomatic carriage of  
15 extended spectrum beta-lactamase producing *Enterobacteriaceae* to identify  
16 modifiable factors to mitigate antimicrobial resistance in the community.  
17  
18
  - 19 • We randomly sampled a large number of households in the community  
20 representative of the Singaporean general public in terms of demographics and  
21 socioeconomic status.  
22  
23
  - 24 • Extended spectrum beta-lactamase producing *Enterobacteriaceae* were confirmed  
25 with both phenotypic antibiotic susceptibilities and whole genome sequencing.  
26  
27
  - 28 • We minimised recall and interviewer biases by designing specific questions that  
29 are carefully constructed to maximize accuracy and completeness, and all  
30 interviewers were trained to adhere to the question and answer format strictly.  
31  
32
  - 33 • Correlations found in the study cannot be viewed as causal given the complexities  
34 in the emergence and transmission of AMR.  
35  
36  
37  
38  
39  
40  
41  
42  
43  
44  
45  
46  
47  
48  
49  
50  
51  
52  
53  
54  
55  
56  
57  
58  
59  
60

## INTRODUCTION

Multidrug resistant *Enterobacteriaceae* (MDRE) have been identified as “critical priority” resistant organisms by the World Health Organization (WHO) in 2017, and are associated with a high overall all-cause mortality, transmissibility and burden.[1] Resistance in *Enterobacteriaceae* is most commonly mediated via the production of extended-spectrum beta-lactamases (ESBL) and carbapenemases.[2] MDRE infections are difficult to treat with few effective antimicrobials on the horizon.[1] Healthy members of the community are increasingly identified as a reservoir of antimicrobial resistance (AMR), especially in the case of ESBL-producing *Enterobacteriaceae* (ESBL-PE).[3] Asymptomatic carriage of ESBL-PE has been associated with more infections, longer hospitalisations, earlier time to death, and higher hospital costs.[4,5]

South East Asian (SEA) countries are known to be a hot spot for AMR.[6] However, the region is heterogeneous with varying healthcare standards and antimicrobial stewardship and utilisation policies.[7] To aid in designing effective public health policies and engage the community in the campaign against AMR, it is crucial to understand the local knowledge, attitude and practices of antibiotic use. This study aims to correlate the epidemiological and behavioral risk factors of ESBL-PE carriage in Singapore, a high-income country in SEA, as well as delineate the genetic mechanisms associated with these resistant organisms.

## METHODOLOGY

### Study population

1  
2  
3 The study was carried out in Clementi Township, a densely populated residential area  
4 in the west of Singapore. It comprises 27,142 households with 91,630 residents who  
5 are socio-demographically comparable to the general Singapore population in terms  
6 of age, gender, ethnicity and housing distribution.[8] The study team returned to non-  
7 responding households for up to three times on separate days to maximise the  
8 response rate. The first adult above 21 years old in each household who responded to  
9 the study team was invited to participate in this cross-sectional study; all consenting  
10 individuals undertook a questionnaire, while some additionally consented to provide a  
11 rectal swab or stool sample. To calculate the number of samples required to estimate  
12 the prevalence of ESBL-PE in the community, we used one-sample Z-test with an  
13 estimated prevalence of 50%, a confidence interval of 95% and maximum tolerable  
14 error of 10%. This yielded about 100 stool samples. Ethical approval was obtained  
15 from National University of Singapore Institutional Review Board (Reference number  
16 B-16-245).

### 37 **Questionnaire on knowledge, attitudes and practices (KAP) on antibiotic intake** 38 **and health-seeking behaviour**

39 We conducted a questionnaire study to assess the KAP of participants towards  
40 antibiotic use. A 40-item questionnaire was developed after performing a thorough  
41 literature review of comparable studies.[9–14] This was then validated by a pilot  
42 study involving 75 community-dwelling volunteers to ensure fluency and accuracy in  
43 question design and language. A team of thirty-three investigators was trained to  
44 administer the survey face-to-face, in languages that the participants are fluent in with  
45 standardised explanations, to ensure consistency.

1  
2  
3 The questionnaire comprised four main sections. The first covered socio-demographic  
4 data and recent antibiotic intake. The second was an assessment of antibiotic  
5 consumption practices, in which two hypothetical scenarios of diarrhoea and upper  
6 respiratory tract symptoms were presented, and participants were asked if they would  
7 visit the doctor should they experience these symptoms for less than 1 week, if they  
8 would expect or insist on an antibiotic prescription from the doctor's visit, and if they  
9 would seek a second opinion if antibiotics were not prescribed. The third component  
10 assessed participants' attitudes and trust towards primary care healthcare providers,  
11 and was adapted from a validated questionnaire from Hall *et al.*[15] The last  
12 component examined participants' knowledge on AMR. The full questionnaire and  
13 grading system can be found in Table S1.  
14  
15  
16  
17  
18  
19  
20  
21  
22  
23  
24  
25  
26  
27  
28  
29  
30

### 31 **Bacterial isolation and antibiotic susceptibility testing**

32  
33 The study team requested fresh stool samples or rectal swabs from all study  
34 participants. The samples of those who consented were collected from the participants  
35 within 24 hours of production and stored centrally at 0-4°C prior to microbiological  
36 processing. All sample processing was carried out in the Singapore General Hospital  
37 Diagnostic Bacteriology Laboratory. Samples were inoculated onto *CHROMagar<sup>TM</sup>*  
38 *ESBL* and *CHROMID<sup>®</sup> CARBA SMART (bioMerieux)* media to detect cephalosporin-  
39 resistant and carbapenem-resistant Gram-negative bacteria, respectively. After 24  
40 hours of incubation, growing colonies were sub-cultured onto sheep blood agar and  
41 used for subsequent species identification and antibiotic susceptibility testing. Species  
42 identification was done by matrix-assisted laser desorption/ionization-time of flight  
43 mass spectrometry (MALDI-TOF MS) (Bruker) and the Vitek-2 (*bioMerieux*) system.  
44  
45  
46  
47  
48  
49  
50  
51  
52  
53  
54  
55  
56  
57  
58  
59  
60

1  
2  
3 Antibiotic susceptibilities to ampicillin, cefazolin, ceftriaxone, ceftiofur, cefepime,  
4 amoxicillin-clavulanic acid, piperacillin-tazobactam, aztreonam, amikacin,  
5 nitrofurantoin, sulfamethoxazole-trimethoprim, gentamicin, ciprofloxacin, fosfomycin,  
6 ertapenem and meropenem were assessed by the disc diffusion method and  
7 interpreted according to the Clinical Laboratory Standards Institute (CLSI)  
8 criteria.[16] *Enterobacteriaceae* isolates that were not susceptible to third/ fourth  
9 generation cephalosporins were identified as potential ESBL producers, while those  
10 not susceptible to any carbapenem were identified as potential carbapenemase  
11 producers. Potential carbapenemase producers were tested phenotypically for  
12 carbapenemase production by modified Hodge test and KPC/MBL and OXA-48  
13 Confirm Kit (ROSCO). All potential carbapenemase producers were also subjected to  
14 the Xpert® Carba-R test (Cepheid) targeting KPC, NDM, OXA-48 like, IMP and VIM  
15 carbapenemase gene sequences.

### 36 **Whole genome sequencing of ESBL-producing *Enterobacteriaceae***

37  
38 DNA extraction was performed for all *Enterobacteriaceae* isolates that are potentially  
39 ESBL- or carbapenemase- producers, with sequencing libraries for each isolate  
40 prepared as per manufacturer's recommendation to be multiplexed sequenced on the  
41 Illumina HiSEQ platform generating paired-end sequence reads of 2x150 basepairs,  
42 having a data throughput of 1GB per isolate. De-novo assembly of the Illumina reads  
43 was performed using the SPAdes Genome Assembler.[17] Bacterial species were  
44 identified using Kraken,[18] comparing with phenotypic results. Multi-locus sequence  
45 types (MLSTs) were determined by a customized script utilising BLAST search for  
46 identification of genotypes at each loci.[19] Genotypic prediction of antimicrobial  
47  
48  
49  
50  
51  
52  
53  
54  
55  
56  
57  
58  
59  
60

1  
2  
3 resistance owing to the existence of specific gene sequences were performed using  
4  
5 SRST2.[20]  
6  
7  
8  
9

### 10 **Statistical Analysis**

11  
12 Univariate descriptive analyses are presented for socio-demographics, ESBL-PE or C-  
13  
14 PE carriage status and presence of specific resistance genes. Dichotomous variables  
15  
16 are expressed in frequencies and percentages, while continuous variables are in means  
17  
18 with standard deviation (SD). Categorical variables are compared with  $\chi^2$  and Fisher's  
19  
20 exact tests and continuous variables with unpaired, 2-tailed t tests or nonparametric  
21  
22 Wilcoxon rank sum tests as appropriate. Linear and logistic regressions are used in  
23  
24 multivariate analyses to identify statistically significant factors that influence and  
25  
26 determine KAP and ESBL-PE carriage. Covariates that were found to be statistically  
27  
28 significant in the univariate analyses were included in the multivariate models. All  
29  
30 tests of significance are performed at  $\alpha=5\%$ . Statistical analysis was carried out using  
31  
32 R Version 1.1.383.[21]  
33  
34  
35  
36  
37  
38  
39

### 40 **Patient and Public Involvement**

41  
42 A group of 75 community dwellers partnered with us for the design and validation of  
43  
44 the study questionnaire to ensure clarity and accuracy, production of informational  
45  
46 material to support recruitment, and evaluation of the burden of the sample collection  
47  
48 from the patient's perspective. Because there was no clear preference for the sample  
49  
50 collection methodology, the study team decided to offer both options of rectal swab  
51  
52 and stool collection to the study participants.  
53  
54  
55  
56  
57

### 58 **RESULTS**

From June 2016 to April 2017, we randomly selected 2,200 households in Clementi for home visits. Out of these 2200 households, 693 (31.5%) agreed to participate, of whom 305 (44.0%) also provided stool samples or rectal swabs (Figure S1). Participant demographics are presented in Table 1. The median age of participants was 53 (IQR 38-66). A slight majority were women (393/693, 56.7%). The ethnic distribution of the participants was similar to the wider Singapore population, with 513 (74.0%) Chinese, 78 (11.3%) Malay, and 83 (12.0%) Indian. The majority had received at least secondary school education (534/693, 77.0%), and stayed in public housing apartments (661/693, 95.4%). The median number of occupants per household was 3 (IQR 2-4) persons. A quarter (25.3%, 175/693) reported having taken antibiotics in the past 6 months, and 102 (14.7%) had recently been hospitalised in the past 1 year.

Table 1. Demographics, medical background and antibiotic use of study participants

| Characteristic                       |                                | N (%)            |
|--------------------------------------|--------------------------------|------------------|
|                                      |                                | Total N=693      |
| Age (median, IQR*)                   |                                | 53.0 (38.0-66.0) |
| Females                              |                                | 393 (56.7)       |
| Race                                 | Chinese                        | 513 (74.0)       |
|                                      | Malay                          | 78 (11.3)        |
|                                      | Indian                         | 83 (12.0)        |
|                                      | Other ethnicities              | 19 (2.7)         |
| Education level                      | Graduate                       | 88 (12.7)        |
|                                      | Diploma                        | 251 (36.2)       |
|                                      | Secondary                      | 195 (28.1)       |
|                                      | Primary                        | 122 (17.6)       |
|                                      | No Formal Education            | 37 (5.3)         |
| Housing type                         | 1-, 2 or 3-room public housing | 334 (48.2)       |
|                                      | 4 or 5- room public housing    | 327 (47.2)       |
|                                      | Private landed property        | 32 (4.6)         |
| Number of occupants in the household | Overall (median, IQR)          | 3 (2-4)          |
|                                      | ≤ 3 persons                    | 369 (53.2)       |
|                                      | 4-5 persons                    | 257 (37.1)       |
|                                      | ≥ 6 persons                    | 67 (9.7)         |



|                                           |                         |            |
|-------------------------------------------|-------------------------|------------|
| Comorbidities                             | Any chronic illnesses   | 239 (34.5) |
|                                           | Hypertension            | 105 (15.2) |
|                                           | Hyperlipidemia          | 76 (11.0)  |
|                                           | Diabetes mellitus       | 67 (9.7)   |
| Recent hospitalisation in the past 1 year |                         | 102 (14.7) |
| Antibiotic consumption                    | Within past 6 months    | 175 (25.3) |
|                                           | More than 6 months ago  | 441 (63.6) |
|                                           | Never taken antibiotics | 77 (11.1)  |

\*IQR- interquartile range, ^Immunocompromised – Use of chemotherapy, corticosteroids or immunosuppressants in the past 6 months

The survey revealed widespread misinformation about antibiotics, with a mean knowledge score of only 4.6 (IQR 3.0-6.0) out of 10 (Table S2). Although the majority of participants knew that viruses are the most common cause of upper respiratory tract infections, a significant proportion (335/693, 48.3%) believed that antibiotics could be used for viral infections and 385 (385/693, 55.6%) thought that the most common cause of diarrhoea was bacteria. The questionnaire also explored participants' compliance to the widely accepted view of completing antibiotic courses. The majority (554/693, 79.9%) said they would complete the course of antibiotics prescribed, while 13.7% (95/693) would stop taking antibiotics when they start to feel better, and 6.3% (44/693) preferred to seek the doctor's opinion before stopping the course. Most participants (564/693, 81.4%) were aware that antibiotics are prescription-only drugs in Singapore, but were unable to correctly answer questions related to AMR, with 82.5% (572/693) not knowing what causes AMR, and 63.2% (438/693) believing AMR was not present in Singapore. Level of education ( $p<0.001$ ) and staying in larger housing ( $p=0.037$ )—the usual proxies for socio-economic status in Singapore—were independent factors associated with higher total knowledge scores. However, higher knowledge scores were not strongly related to participants' trust in primary care physicians (OR 1.08, 95%CI 0.97-1.20) or the

1  
2  
3 expectation of an antibiotic prescription for common viral infections (OR 0.98,  
4  
5 95%CI 0.96-1.0).  
6  
7  
8  
9

10 A large majority of the community continued to place trust in their primary care  
11  
12 doctors (Table S3). Most strikingly, 627 participants (627/693, 90.6%) trusted  
13  
14 healthcare professionals as their primary source of medical information, over the  
15  
16 Internet, media and family and friends. There were no significant associations  
17  
18 between demographic factors and attitude scores in contrast to the differences seen in  
19  
20 knowledge scores.  
21  
22  
23  
24  
25

26 In the two scenarios (of having an upper-respiratory tract infection or diarrhoea and  
27  
28 vomiting), although about half of the participants (294/693, 42.4% for cough and  
29  
30 runny nose, 414/693, 59.7% for diarrhoea and vomiting) envisioned visiting the  
31  
32 doctor for common complaints lasting less than 1 week, only 18.5% (average  
33  
34 128/693) expected an antibiotic prescription (Table S4). Were antibiotics not  
35  
36 prescribed during the initial visit, very few (average 39/693, 5.6%) reported they  
37  
38 would insist on antibiotic prescription or seek a second opinion. The only independent  
39  
40 factor associated with the expectation of an antibiotic prescription was younger age  
41  
42 (OR 0.98, 95%CI 0.97- 0.99) in multivariate logistic analysis. In dealing with leftover  
43  
44 antibiotics, the majority 68.7% (476/693) declared that they do not have leftovers  
45  
46 antibiotics; others reported keeping them for future use (60/693, 8.7%) or disposing  
47  
48 with solid waste (130/693, 18.8%) or down the drain (8/693, 1.2%). Only 3.3%  
49  
50 (23/693) admitted to having previously shared antibiotics with family members and  
51  
52 5.5% (38/693) to having taken leftover antibiotics from a previous illness.  
53  
54  
55  
56  
57  
58  
59  
60

### Asymptomatic carriage of ESBL-PE

Three hundred and five participants (305/693, 44.0%) provided rectal swabs or stool samples for microbiology cultures. The participants who provided stool samples were not significantly different from those who did not, in terms of age, gender and education level. Eighty participants (80/305, 26.2%, 95%CI: 21.5-31.6%) were found to carry at least one ceftriaxone non-susceptible *Enterobacteriaceae* isolate. One hundred and fifteen isolates were detected on the ESBL screening media, of which 93 were ceftriaxone resistant or intermediate *Enterobacteriaceae*. Six bacterial isolates were detected on the CRE screening media, none of which were confirmed to be carbapenemase-producing *Enterobacteriaceae*. The factors associated with ESBL-PE carriage from multivariate logistic regression analysis were residency overseas for more than 1 year (OR 3.3, 95%CI 1.6-6.9), with the most common location being other parts of Asia, scoring higher than 6 on the knowledge component in the questionnaire (OR 2.0 95%CI 1.03- 3.9) and having no left over antibiotics (OR 2.4, 95%CI 1.24-4.9). Interestingly, recent hospitalisation and reported antibiotic intake were not associated with ESBL-PE carriage (Table 2).

Table 2. Univariate analysis of demographic characteristics associated with carriage of ceftriaxone- resistant *Enterobacteriaceae*

| Factors            |           | Total<br>N=305   | Carriers<br>N=80 | Non-carriers<br>N=225 | p-<br>values |
|--------------------|-----------|------------------|------------------|-----------------------|--------------|
| Age (median, IQR*) |           | 54.0 (41.0-65.0) | 56.0 (38.8-66.0) | 54.0 (41.0-65.0)      | 0.79         |
| Females (%)        |           | 169 (55.4)       | 46 (57.5)        | 123 (54.7)            | 0.76         |
| Ethnicity (%)      | Chinese   | 237 (77.7)       | 67 (83.8)        | 170 (75.6)            | 0.24         |
|                    | Malay     | 28 (9.2)         | 3 (3.8)          | 25 (11.1)             |              |
|                    | Indian    | 30 (9.8)         | 7 (8.8)          | 23 (10.2)             |              |
|                    | Others    | 10 (3.3)         | 3 (3.8)          | 7 (3.1)               |              |
| Education (%)      | No formal | 11 (3.6)         | 4 (5.0)          | 7 (3.1)               | 0.45         |

|                                                                   |                                    |            |           |            |        |
|-------------------------------------------------------------------|------------------------------------|------------|-----------|------------|--------|
|                                                                   | education                          |            |           |            |        |
|                                                                   | Primary                            | 57 (18.7)  | 12 (15.0) | 45 (20.0)  |        |
|                                                                   | Secondary                          | 93 (30.5)  | 21 (26.2) | 72 (32.0)  |        |
|                                                                   | Tertiary                           | 110 (36.1) | 31 (38.8) | 79 (35.1)  |        |
|                                                                   | Graduate                           | 34 (11.1)  | 12 (15.0) | 22 (9.8)   |        |
| Housing (%)                                                       | HDB 1- and 2-room                  | 23 (7.5)   | 5 (6.2)   | 18 (8.0)   | 0.75   |
|                                                                   | HDB 3-room                         | 115 (37.7) | 32 (40.0) | 83 (36.9)  |        |
|                                                                   | HDB 4-room                         | 98 (32.1)  | 24 (30.0) | 74 (32.9)  |        |
|                                                                   | HDB 5-room and Executive Apartment | 47 (15.4)  | 11 (13.8) | 36 (16.0)  |        |
|                                                                   | Landed Property                    | 22 (7.2)   | 8 (10.0)  | 14 (6.2)   |        |
| Pets (%)                                                          |                                    | 33 (10.8)  | 7 (8.8)   | 26 (11.6)  | 0.75   |
| Number of occupants in the household (mean, sd)                   |                                    | 3.6 (1.6)  | 3.6 (1.6) | 3.6 (1.6)  | 0.71   |
| Stayed overseas for >1 year (%)                                   |                                    | 57 (18.7)  | 26 (32.5) | 31 (13.8)  | <0.001 |
| Stayed in South, East or Southeast Asia for >1 year (%)           |                                    | 40 (13.1)  | 18 (22.5) | 22 (9.8)   | 0.01   |
| Travelled in the past >1 year (%)                                 |                                    | 178 (58.4) | 47 (58.8) | 131 (58.2) | 1.0    |
| Travelled in South, East or Southeast Asia in the past 1 year (%) |                                    | 163 (53.4) | 43 (53.8) | 120 (53.3) | 1.0    |
| Any chronic illnesses (%)                                         |                                    | 127 (41.6) | 33 (41.2) | 94 (41.8)  | 1.0    |
| Hospitalisation in the past 1 year (%)                            |                                    | 43 (14.1)  | 14 (17.5) | 29 (12.9)  | 0.41   |
| Previous antibiotics intake (%)                                   |                                    | 282 (92.5) | 76 (95.0) | 206 (91.6) | 0.45   |
| Antibiotics in the last 6 months (%)                              |                                    | 85 (27.9)  | 23 (28.8) | 62 (27.6)  | 0.61   |
| Knowledge score >6 (%)                                            |                                    | 89 (29.2)  | 33 (41.3) | 56 (24.9)  | 0.01   |
| No left over antibiotics (%)                                      |                                    | 211 (69.2) | 63 (78.8) | 148 (65.8) | 0.04   |

\*IQR- interquartile range

Out of the 93 ceftriaxone-resistant isolates, 17 were cefoxitin resistant, suggestive of AmpC  $\beta$ -Lactamase production. Only one *Enterobacter cloacae* complex isolate was resistant to ertapenem and was of intermediate susceptibility to meropenem (Table 3). This *Enterobacter cloacae* complex isolate was not a carbapenemase-producer based

on phenotypic and genotypic tests. Eighty-three (83/93, 89.2%) of these ESBL-PE isolates were *E. coli*. The majority of ESBL-PE remained susceptible to aminoglycosides including gentamicin (80/93, 86.0%) and amikacin (91/93, 97.8%) as well as nitrofurantoin (76/93, 81.7%), while ciprofloxacin (53/93, 57.0%) and Sulfamethoxazole-trimethoprim (32/93, 34.4%) resistance were more common.

Table 3. Antibiotic susceptibility of the ceftriaxone-resistant isolates

|                               | <i>E coli</i> (N=83)<br>N (%) | <i>Klebsiella</i> (N=6)<br>N (%) | Others^ (N=4)<br>N (%) | Total (N=93)<br>N (%) |
|-------------------------------|-------------------------------|----------------------------------|------------------------|-----------------------|
| Piperacillin-tazobactam       | 73 (88.0)                     | 4 (66.7)                         | 1 (25.0)               | 78 (83.9)             |
| Cefepime                      | 35 (42.4)                     | 3 (50)                           | 2 (50.0)               | 40 (43.0)             |
| Aztreonam                     | 39 (47.0)                     | 2 (33.3)                         | 1 (25.0)               | 42 (45.2)             |
| Amikacin                      | 82 (98.8)                     | 5 (83.3)                         | 4 (100)                | 91 (97.8)             |
| Gentamicin                    | 75 (90.4)                     | 3 (50)                           | 2 (50.0)               | 80 (86.0)             |
| Nitrofurantoin                | 73 (88.0)                     | 2 (33.3)                         | 1 (25.0)               | 76 (81.7)             |
| Sulfamethoxazole-trimethoprim | 32 (38.6)                     | 0 (0)                            | 0 (0)                  | 32 (34.4)             |
| Ciprofloxacin                 | 48 (57.8)                     | 4 (66.7)                         | 1 (25.0)               | 53 (57.0)             |
| Fosfomycin                    | 63 (75.9)                     | 1 (16.7)                         | 0 (0)                  | 64 (68.8)             |
| Ertapenem                     | 83 (100)                      | 6 (100)                          | 3 (75.0)               | 92 (98.9)             |
| Meropenem                     | 83 (100)                      | 6 (100)                          | 3 (75.0)               | 92 (98.9)             |

^ Others include *Enterobacter* spp (2), *Proteus mirabilis* (1), *Raoultella ornithinolytica* (1)

### Molecular classification of ESBL-PE

Eighty (80/93, 85%) ESBL-PE isolates from unique participants underwent whole genome sequencing. When two or more isolates grew from a single subject's sample, *E. coli*, the commonest species observed, was selected to facilitate comparisons. Genotypic species determination from the sequence reads correlated completely with the results by MALDI-TOF MS or the Vitek-2 system. Seventy-one (71/80, 88.8%)

1  
2  
3 isolates were *E. coli*, of which the most common molecular type was sequence type  
4 (ST) 131 (11/71, 15.5%) (Table S5). The most frequently observed ESBL gene was  
5 CTX-M (62/80, 77.5%), especially CTX-M-15 (21/71, 29.6%) and CTX-M-27  
6 (16/71, 22.5%). *E. coli* ST131 were more resistant to fluoroquinolones than non-  
7 ST131 isolates ( $p=0.041$ ). The only significant factor from the questionnaire  
8 associated with ESBL-producing *E. coli* ST131 carriage was having more children in  
9 the household, but the difference was marginal (mean  $0.3\pm 0.7$  versus  $0.8 \pm 1.1$ ,  
10  $p=0.034$ ).  
11  
12  
13  
14  
15  
16  
17  
18  
19  
20  
21  
22  
23

## 24 DISCUSSION

25  
26 We found a significant burden of ESBL-PE carriage (80/305, 26.2%) among healthy  
27 community dwellers in Singapore, twice the rate found in an earlier study in 2014 of  
28 patients at an emergency department.[22] Similar rises have been observed  
29 globally.[3] Although these figures are lower than the reported prevalence of over  
30 40% fecal carriage with ESBL-PE elsewhere in South and South East Asia, they are  
31 much higher than the 1.5-3% observed in the US and UK.[3] Singapore has a tightly  
32 regulated antibiotic prescription system similar to Europe and the US where only  
33 registered medical practitioners are allowed to prescribe antibiotics, and they must be  
34 purchased from licensed dispensers. We did not find any association between fecal  
35 carriage of ESBL-PE and short-term travel, unlike other studies.[23] Singapore is a  
36 city-state and overseas travel is very common, making it hard to detect such a  
37 relationship when frequent trips to neighbouring countries are made. However, past  
38 residency overseas was strongly associated with colonisation, especially those who  
39 lived elsewhere in South or South East Asia (OR 3.3, 95%CI 1.6- 6.9). Distinctions  
40 should be made in future studies on overseas travels and AMR carriage in terms of  
41  
42  
43  
44  
45  
46  
47  
48  
49  
50  
51  
52  
53  
54  
55  
56  
57  
58  
59  
60

1  
2  
3 duration and frequency of travel, in addition to destinations. The possibility of  
4  
5 substantial acquisition of MDRO colonisation and infection through overseas  
6  
7 exposure[24,25] once again highlights the urgent need for a regional, collaborative  
8  
9 approach to tackling the problem of AMR.  
10  
11  
12  
13

14  
15 In addition, we did not find an association between recent antibiotic intake in the past  
16  
17 6 months and ESBL-PE carriage. This is inconsistent with previous reports showing  
18  
19 that consumption of certain classes of antibiotics such as beta-lactams and  
20  
21 fluoroquinolones are risk factors for predispositions to ESBL-PE carriage. [26,27]  
22  
23 The possible reasons could be due to the relatively small number of participants who  
24  
25 had recent antibiotic intake (85/305, 27.9%), so we were not able to distinguish the  
26  
27 specific classes of antibiotics taken by the participants. It is also possible that the  
28  
29 dominance of a hyperendemic community-associated clone rather than antibiotic  
30  
31 selection pressure alone contributed to this finding.  
32  
33  
34  
35  
36  
37

38 Molecular typing of the ESBL-PE isolates from our cohort showed that *E. coli* ST131  
39  
40 with CTX-M beta-lactamases (11/71, 15.5%) were the most common ESBL  
41  
42 mechanism, echoing the global dissemination of this hyperendemic clone, especially  
43  
44 in the community.[28] Similar reports showed 11.1% (32/287) in China[29] and 4.1%  
45  
46 (8/193) in Thailand[30] have been published. The reason for the rapid worldwide  
47  
48 expansion and long-term persistence of *E. coli* ST131 is thought to be due to  
49  
50 compensatory mutations within the core genome counterbalancing the fitness cost  
51  
52 associated with IncF plasmids, thus sustaining its spread even in the absence of direct  
53  
54 antibiotic selection pressure.[31] These *E. coli* ST131 are not just prevalent colonisers  
55  
56 but have also associated with invasive bloodstream infections in hospitalized patients  
57  
58  
59  
60

1  
2  
3 in Australia, New Zealand and Singapore.[32] It will be important to better  
4  
5 understand the evolutionary ecology and transmission dynamics of this emerging  
6  
7 clone.  
8  
9

10  
11  
12 This study also revealed widespread misconceptions about the utility of antibiotics for  
13  
14 viral infections, consistent with the findings of a global survey conducted by the  
15  
16 WHO in 2015.[33] We also found that, the public continues to place trust in their  
17  
18 primary care doctors and their recommendations. This dependence on physicians is in  
19  
20 contrast to doctors' perceptions of patient expectations for antibiotic  
21  
22 prescriptions.[34] This discordance has been previously described and is thought to be  
23  
24 due to the lack of empowerment of the patient and the erroneous attribution of patient  
25  
26 satisfaction to antibiotic prescription rather than a focus on better patient-doctor  
27  
28 communication.[35,36]  
29  
30  
31  
32  
33

34  
35 Engaging and educating both the prescribers and the public may reduce inappropriate  
36  
37 antibiotic use,[37,38] and has been identified as a key strategy by the WHO and the  
38  
39 UK to tackle AMR.[39,40] One of the most striking findings of this study is that  
40  
41 having both the knowledge that antibiotic courses should be completed and not  
42  
43 having left over antibiotics is independently associated with the carriage of ESBL-PE.  
44  
45 Though these relationships cannot be viewed as causal given the complexities in the  
46  
47 emergence and transmission of AMR, there is emerging evidence supporting short  
48  
49 course antibiotic therapies, even for severe infections such as bacteremia, given the  
50  
51 collateral damage that antibiotics have on host microbiome.[41] The current WHO  
52  
53 recommendation remains that full courses of antibiotics should be completed to  
54  
55 prevent the onset of resistance.[33] Similar messages are advocated in national  
56  
57  
58  
59  
60



1  
2  
3 campaigns launched in Australia,[42] the United States[43] and Europe.[44] Given  
4  
5 that the minimum effective treatment durations have not been determined for many  
6  
7 infections and that a significant proportion of antibiotic prescriptions are  
8  
9 inappropriate, the emphasis on completing the course of antibiotics to prevent  
10  
11 resistance may have to be re-examined.  
12  
13  
14  
15  
16

17 To our knowledge, this is the first study that explored antibiotic consumption  
18  
19 behavior with the acquisition of MDRO at a community level. This novel approach  
20  
21 has the potential to guide clinicians and policy makers in identifying directly  
22  
23 actionable interventions for the population. The main weakness of our study is that  
24  
25 the questionnaire data is self-reported and subjected to recall and interviewer biases.  
26  
27 We minimised these errors by designing specific questions that are carefully  
28  
29 constructed to maximize accuracy and completeness, and all interviewers were trained  
30  
31 to adhere to the question and answer format strictly. Further research using antibiotic  
32  
33 prescription databases can potentially overcome some of the intrinsic biases arising  
34  
35 from cross-sectional questionnaires.  
36  
37  
38  
39  
40  
41

## 42 **CONCLUSION**

43  
44 There is a significant burden of asymptomatic ESBL-PE colonisation in Singapore,  
45  
46 especially with *E. coli* ST131 carrying CTX-M. This is correlated with KAP of  
47  
48 antibiotic use, especially with the practice of finishing full courses of antibiotics, and  
49  
50 prolonged residency in other parts of Asia. Innovative approaches to control AMR  
51  
52 that take into account transboundary transmission of resistance and clinical trials to  
53  
54 determine the appropriate duration of antimicrobial therapy will be critical to control  
55  
56  
57  
58  
59  
60

1  
2  
3 the emergence of these resistant clones which have contributed significantly to the  
4  
5 current global antibiotic resistance crisis.  
6  
7  
8  
9

## 10 **CONTRIBUTOR AND GUARANTOR INFORMATION**

11  
12 YM, PAT, ARC, IS, PSPL, XLJK and KYMW conceptualised and designed the  
13  
14 study. IS, PSPL, XLJK and KYMW conducted the study and collected data. KKKK  
15  
16 performed microbiological testing. RTHO planned and conducted genomic  
17  
18 sequencing and interpreted the results. YM, ARC, IS, PSPL, XLJK and KYMW  
19  
20 performed data analysis. All participated in the writing of the script, and affirm that  
21  
22 the manuscript is an honest, accurate, and transparent account of the study being  
23  
24 reported; that no important aspects of the study have been omitted; and that any  
25  
26 discrepancies from the study as originally planned have been explained. YM and IS  
27  
28 accept full responsibility for the work and/or the conduct of the study, had access to  
29  
30 the data, and controlled the decision to publish. The corresponding author attests that  
31  
32 all listed authors meet authorship criteria and no others meeting the criteria have been  
33  
34 omitted.  
35  
36  
37  
38  
39  
40  
41

## 42 **ACKNOWLEDGEMENT**

43  
44 The authors thank the study team members, Ang Chen Xiang, Anne Goei Hui Yi,  
45  
46 Charmaine Loh Hui Yun, Cheong Shao Wei Dominic, Chew Shi Jie, Chong Yvette,  
47  
48 Choo Hui Min Charlotte, Choo Xin Yi, Daveraj Sivasegaran, Dean Krishen Sethi,  
49  
50 Joshua Tan Teck Chin, Keith Ching Wei Jie, Khoo Chun Yuet, Krystal Khoo Oon  
51  
52 Hui, Lai Jieru, Liew Yi Song Terence, Lim Li Liang Joshua, Lok Si Ying Andrea,  
53  
54 Lynette Sim Pei Shuen, Michelle Sim Yan Lin, Mok Charlene, Ong Yuxuan Daniel,  
55  
56 Ong Zheng Xuan, Quek Keng Liang, R Krishnapriya, Sophia Ng Shuen Yii, Tan Fang  
57  
58  
59  
60

1  
2  
3 Min Grace, Tan Jian Wei, Tan Pei Min Mabelleline, Tay Yiling Elaine, Tey Min Li,  
4  
5 Wu Yanlin, Zhou Lingyue, for their contributions in carrying out home visits,  
6  
7 interviews and sample collections.  
8  
9

## 10 11 12 **COPYRIGHT/LICENCE FOR PUBLICATION**

13  
14 The Corresponding Author has the right to grant on behalf of all authors and does  
15  
16 grant on behalf of all authors, a worldwide licence to the Publishers and its licensees  
17  
18 in the perpetuity, in all forms, formats and media (whether known now or created in  
19  
20 the future), to i) publish, reproduce, distribute display and store the Contribution, ii)  
21  
22 translate the Contribution into other languages, create adaptations, reprints, include  
23  
24 within collections and create summaries, extracts and/or, abstracts of the  
25  
26 Contribution, iii) create any other derivative work(s) based on the Contribution, iv) to  
27  
28 exploit all subsidiary rights in the Contribution, v) the inclusion of electronic links  
29  
30 from the Contribution to third party material where-ever it may be located; and, vi)  
31  
32 licence any third party to do any or all of the above.  
33  
34  
35  
36  
37  
38  
39

## 40 **FUNDING**

41  
42 Data collection was supported from funding from the Infectious Diseases Research  
43  
44 Fund, National University of Singapore (NUS), and the Saw Swee Hock School of  
45  
46 Public Health (SSHSPH). RTHO received funding support from the SSHSPH, NUS.  
47  
48 ARC was supported by the Singapore Ministry of Health's National Medical  
49  
50 Research Council under the Centre Grant Programme - Singapore Population Health  
51  
52 Improvement Centre (NMRC/CG/C026/2017\_NUHS).  
53  
54  
55  
56  
57

## 58 **COMPETING INTERESTS DECLARATION**

1  
2  
3 All authors have completed the ICMJE uniform disclosure form at  
4  
5 www.icmje.org/coi\_disclosure.pdf and declare: no financial relationships with any  
6  
7 organisations that might have an interest in the submitted work in the previous three  
8  
9 years; no other relationships or activities that could appear to have influenced the  
10  
11 submitted work.  
12  
13  
14  
15  
16

## 17 DATA SHARING

18  
19 The authors commit to making the relevant anonymised patient level data available on  
20  
21 reasonable request.  
22  
23  
24  
25

## 26 REFERENCES

- 27  
28  
29 1 Tacconelli E, Carrara E, Savoldi A, *et al.* Discovery, research, and  
30  
31 development of new antibiotics: the WHO priority list of antibiotic-resistant  
32  
33 bacteria and tuberculosis. *Lancet Infect Dis* 2018;**18**:318–27.  
34  
35 doi:10.1016/S1473-3099(17)30753-3  
36  
37  
38 2 Ruppé É, Woerther P-L, Barbier F. Mechanisms of antimicrobial resistance in  
39  
40 Gram-negative bacilli. *Ann Intensive Care* 2015;**5**:61. doi:10.1186/s13613-015-  
41  
42 0061-0  
43  
44  
45 3 Karanika S, Karantanos T, Arvanitis M, *et al.* Fecal Colonization With  
46  
47 Extended-spectrum Beta-lactamase–Producing *Enterobacteriaceae* and Risk  
48  
49 Factors Among Healthy Individuals: A Systematic Review and Metaanalysis.  
50  
51 *Clin Infect Dis* 2016;**63**:310–8. doi:10.1093/cid/ciw283  
52  
53  
54 4 Reddy P, Malczynski M, Obias A, *et al.* Screening for Extended-Spectrum -  
55  
56 Lactamase-Producing *Enterobacteriaceae* among High-Risk Patients and Rates  
57  
58 of Subsequent Bacteremia. *Clin Infect Dis* 2007;**45**:846–52.  
59  
60

- 1  
2  
3 doi:10.1086/521260  
4  
5  
6 5 Troché G, Toly L-M, Guibert M, *et al.* Detection and Treatment of Antibiotic-  
7  
8 Resistant Bacterial Carriage in a Surgical Intensive Care Unit: A 6-Year  
9  
10 Prospective Survey. *Infect Control Hosp Epidemiol* 2005;**26**:161–5.  
11  
12 doi:10.1086/502521  
13  
14  
15 6 Coker RJ, Hunter BM, Rudge JW, *et al.* Emerging infectious diseases in  
16  
17 southeast Asia: regional challenges to control. *Lancet* 2011;**377**:599–609.  
18  
19 doi:10.1016/S0140-6736(10)62004-1  
20  
21  
22 7 Zellweger RM, Carrique-Mas J, Limmathurotsakul D, *et al.* A current  
23  
24 perspective on antimicrobial resistance in Southeast Asia. *J Antimicrob*  
25  
26 *Chemother* 2017;**72**:2963–72. doi:10.1093/jac/dkx260  
27  
28  
29 8 Singapore Department of Statistics. Singapore Residents by Planning  
30  
31 Area/Subzone, 2015. 2015.  
32  
33  
34 9 Pan DST, Huang JH, Lee MHM, *et al.* Knowledge, attitudes and practices  
35  
36 towards antibiotic use in upper respiratory tract infections among patients  
37  
38 seeking primary health care in Singapore. *BMC Fam Pract* 2016;**17**:148.  
39  
40 doi:10.1186/s12875-016-0547-3  
41  
42  
43 10 Scaioli G, Gualano MR, Gili R, *et al.* Antibiotic Use: A Cross-Sectional  
44  
45 Survey Assessing the Knowledge, Attitudes and Practices amongst Students of  
46  
47 a School of Medicine in Italy. *PLoS One* 2015;**10**:e0122476.  
48  
49 doi:10.1371/journal.pone.0122476  
50  
51  
52 11 Awad AI, Aboud EA. Knowledge, attitude and practice towards antibiotic use  
53  
54 among the public in Kuwait. *PLoS One* 2015;**10**:e0117910.  
55  
56 doi:10.1371/journal.pone.0117910  
57  
58  
59 12 Huang Y, Gu J, Zhang M, *et al.* Knowledge, attitude and practice of  
60

- 1  
2  
3 antibiotics: a questionnaire study among 2500 Chinese students. *BMC Med*  
4  
5 *Educ* 2013;**13**:163. doi:10.1186/1472-6920-13-163  
6  
7  
8 13 Lv B, Zhou Z, Xu G, *et al.* Knowledge, attitudes and practices concerning self-  
9  
10 medication with antibiotics among university students in western China. *Trop*  
11  
12 *Med Int Heal* 2014;**19**:769–79. doi:10.1111/tmi.12322  
13  
14  
15 14 Teck KC, Ghazi HF, Bin Ahmad MI, *et al.* Knowledge, Attitude, and Practice  
16  
17 of Parents Regarding Antibiotic Usage in Treating Children’s Upper  
18  
19 Respiratory Tract Infection at Primary Health Clinic in Kuala Lumpur,  
20  
21 Malaysia. *Heal Serv Res Manag Epidemiol* 2016;**3**:233339281664372.  
22  
23 doi:10.1177/2333392816643720  
24  
25  
26 15 Hall MA, Zheng B, Dugan E, *et al.* Measuring Patients’ Trust in their Primary  
27  
28 Care Providers. *Med Care Res Rev* 2002;**59**:293–318.  
29  
30 doi:10.1177/1077558702059003004  
31  
32  
33 16 Performance Standards for Antimicrobial Susceptibility Testing An  
34  
35 informational supplement for global application developed through the Clinical  
36  
37 and Laboratory Standards Institute.  
38  
39 <http://ljzx.cqrmhospital.com/upfiles/201601/20160112155335884.pdf>  
40  
41 (accessed 12 Apr 2018).  
42  
43  
44 17 Bankevich A, Nurk S, Antipov D, *et al.* SPAdes: a new genome assembly  
45  
46 algorithm and its applications to single-cell sequencing. *J Comput Biol*  
47  
48 2012;**19**:455–77. doi:10.1089/cmb.2012.0021  
49  
50  
51 18 Wood DE, Salzberg SL. Kraken: ultrafast metagenomic sequence classification  
52  
53 using exact alignments. *Genome Biol* 2014;**15**:R46. doi:10.1186/gb-2014-15-3-  
54  
55 r46  
56  
57  
58 19 Madden T. Chapter 16. The BLAST Sequence Analysis Tool.  
59  
60

- 1  
2  
3 [https://www.ncbi.nlm.nih.gov/books/NBK21097/pdf/Bookshelf\\_NBK21097.p](https://www.ncbi.nlm.nih.gov/books/NBK21097/pdf/Bookshelf_NBK21097.pdf)  
4 [df](https://www.ncbi.nlm.nih.gov/books/NBK21097/pdf/Bookshelf_NBK21097.pdf) (accessed 20 Apr 2018).  
5  
6  
7  
8 20 Inouye M, Dashnow H, Raven L-A, *et al*. SRST2: Rapid genomic surveillance  
9 for public health and hospital microbiology labs. *Genome Med* 2014;**6**:90.  
10 doi:10.1186/s13073-014-0090-6  
11  
12  
13  
14  
15 21 R Core Team. A language and environment for statistical computing. 2017.  
16  
17 22 Young BE, Lye DC, Krishnan P, *et al*. A prospective observational study of the  
18 prevalence and risk factors for colonization by antibiotic resistant bacteria in  
19 patients at admission to hospital in Singapore. *BMC Infect Dis* 2014;**14**:298.  
20 doi:10.1186/1471-2334-14-298  
21  
22  
23  
24  
25  
26 23 McNulty CAM, Lecky DM, Xu-McCrae L, *et al*. CTX-M ESBL-producing  
27 Enterobacteriaceae: estimated prevalence in adults in England in 2014. *J*  
28 *Antimicrob Chemother* Published Online First: 5 March 2018.  
29 doi:10.1093/jac/dky007  
30  
31  
32  
33  
34  
35 24 Tängdén T, Cars O, Melhus A, *et al*. Foreign travel is a major risk factor for  
36 colonization with Escherichia coli producing CTX-M-type extended-spectrum  
37 beta-lactamases: a prospective study with Swedish volunteers. *Antimicrob*  
38 *Agents Chemother* 2010;**54**:3564–8. doi:10.1128/AAC.00220-10  
39  
40  
41  
42  
43  
44 25 Woerther P-L, Andremont A, Kantele A. Travel-acquired ESBL-producing  
45 Enterobacteriaceae: impact of colonization at individual and community level.  
46 *J Travel Med* 2017;**24**:S29–34. doi:10.1093/jtm/taw101  
47  
48  
49  
50  
51 26 Augustine MR, Testerman TL, Justo JA, *et al*. Clinical Risk Score for  
52 Prediction of Extended-Spectrum  $\beta$ -Lactamase-Producing Enterobacteriaceae  
53 in Bloodstream Isolates. *Infect Control Hosp Epidemiol* 2017;**38**:266–72.  
54  
55  
56  
57  
58  
59  
60

- 1  
2  
3 27 Tumbarello M, Treccarichi EM, Bassetti M, *et al.* Identifying Patients  
4  
5 Harboring Extended-Spectrum- $\beta$ -Lactamase-Producing Enterobacteriaceae on  
6  
7 Hospital Admission: Derivation and Validation of a Scoring System.  
8  
9  
10 *Antimicrob Agents Chemother* 2011;**55**:3485–90. doi:10.1128/AAC.00009-11  
11  
12 28 Dautzenberg MJD, Haverkate MR, Bonten MJM, *et al.* Epidemic potential of  
13  
14 Escherichia coli ST131 and Klebsiella pneumoniae ST258: a systematic review  
15  
16 and meta-analysis. *BMJ Open* 2016;**6**:e009971. doi:10.1136/bmjopen-2015-  
17  
18 009971  
19  
20  
21 29 Zhong Y-M, Liu W-E, Liang X-H, *et al.* Emergence and spread of O16-ST131  
22  
23 and O25b-ST131 clones among faecal CTX-M-producing Escherichia coli in  
24  
25 healthy individuals in Hunan Province, China. *J Antimicrob Chemother*  
26  
27 2015;**70**:2223–7. doi:10.1093/jac/dkv114  
28  
29  
30 30 Niumsup PR, Tansawai U, Na-udom A, *et al.* Prevalence and risk factors for  
31  
32 intestinal carriage of CTX-M-type ESBLs in Enterobacteriaceae from a Thai  
33  
34 community. *Eur J Clin Microbiol Infect Dis* 2018;**37**:69–75.  
35  
36 doi:10.1007/s10096-017-3102-9  
37  
38  
39 31 Pitout JDD, DeVinney R. Escherichia coli ST131: a multidrug-resistant clone  
40  
41 primed for global domination. *F1000Research* 2017;**6**.  
42  
43 doi:10.12688/f1000research.10609.1  
44  
45  
46 32 Harris PNA, Ben Zakour NL, Roberts LW, *et al.* Whole genome analysis of  
47  
48 cephalosporin-resistant Escherichia coli from bloodstream infections in  
49  
50 Australia, New Zealand and Singapore: high prevalence of CMY-2 producers  
51  
52 and ST131 carrying blaCTX-M-15 and blaCTX-M-27. *J Antimicrob*  
53  
54 *Chemother* 2018;**73**:634–42. doi:10.1093/jac/dkx466  
55  
56  
57 33 Antibiotic resistance: Multi-country public awareness survey. World Heal.  
58  
59  
60



- 1  
2  
3 Organ.  
4  
5 2016.<http://www.who.int/drugresistance/documents/baselinesurveynov2015/en>  
6  
7 / (accessed 25 Mar 2018).  
8  
9
- 10 34 Lee T-H, Wong JG, Lye DC, *et al.* Medical and psychosocial factors associated  
11 with antibiotic prescribing in primary care: survey questionnaire and factor  
12 analysis. *Br J Gen Pract* 2017;**67**:e168–77. doi:10.3399/bjgp17X688885  
13  
14
- 15 35 Welschen I, Kuyvenhoven M, Hoes A, *et al.* Antibiotics for acute respiratory  
16 tract symptoms: patients' expectations, GPs' management and patient  
17 satisfaction. *Fam Pract*; **21**. doi:10.1093/fampra/cmh303  
18  
19
- 20 36 Davey P, Pagliari C, Hayes A. The patient's role in the spread and control of  
21 bacterial resistance to antibiotics. *Clin Microbiol Infect* 2002;**8**:43–68.  
22 doi:10.1046/J.1469-0691.8.S.2.6.X  
23  
24
- 25 37 McNulty CAM, Cookson BD, Lewis MAO. Education of healthcare  
26 professionals and the public. *J Antimicrob Chemother* 2012;**67**:i11–8.  
27 doi:10.1093/jac/dks199  
28  
29
- 30 38 Little P, Stuart B, Francis N, *et al.* Effects of internet-based training on  
31 antibiotic prescribing rates for acute respiratory-tract infections: a  
32 multinational, cluster, randomised, factorial, controlled trial. *Lancet*  
33 2013;**382**:1175–82. doi:10.1016/S0140-6736(13)60994-0  
34  
35
- 36 39 UK Five Year Antimicrobial Resistance Strategy 2013 to 2018.  
37 [https://assets.publishing.service.gov.uk/government/uploads/system/uploads/att](https://assets.publishing.service.gov.uk/government/uploads/system/uploads/attachment_data/file/244058/20130902_UK_5_year_AMR_strategy.pdf)  
38  
39  
40  
41  
42  
43  
44  
45  
46  
47  
48  
49  
50  
51  
52  
53  
54  
55  
56  
57  
58  
59  
60
- 40 WHO Global Strategy for Containment of Antimicrobial Resistance WHO  
Global Strategy for Containment of Antimicrobial Resistance. World Heal.

- 1  
2  
3 Organ. [http://www.who.int/drugresistance/WHO\\_Global\\_Strategy\\_English.pdf](http://www.who.int/drugresistance/WHO_Global_Strategy_English.pdf)  
4  
5 (accessed 5 Apr 2018).  
6  
7  
8 41 Llewelyn MJ, Fitzpatrick JM, Darwin E, *et al.* The antibiotic course has had its  
9  
10 day. *BMJ* 2017;;j3418. doi:10.1136/bmj.j3418  
11  
12 42 Antibiotics and antibiotic resistance. NPS MedicineWise.  
13  
14 2018.[https://www.nps.org.au/medical-info/consumer-info/antibiotic-resistance-](https://www.nps.org.au/medical-info/consumer-info/antibiotic-resistance-the-facts)  
15  
16 the-facts (accessed 10 Apr 2018).  
17  
18  
19 43 Consumer Updates - Combating Antibiotic Resistance.  
20  
21 2018.<https://www.fda.gov/ForConsumers/ConsumerUpdates/ucm092810.htm>  
22  
23 (accessed 10 Apr 2018).  
24  
25  
26 44 Factsheet for the general public - Antimicrobial resistance.  
27  
28 [https://ecdc.europa.eu/en/antimicrobial-resistance/facts/factsheets/general-](https://ecdc.europa.eu/en/antimicrobial-resistance/facts/factsheets/general-public)  
29  
30 public (accessed 10 Apr 2018).  
31  
32  
33  
34  
35  
36  
37  
38  
39  
40  
41  
42  
43  
44  
45  
46  
47  
48  
49  
50  
51  
52  
53  
54  
55  
56  
57  
58  
59  
60

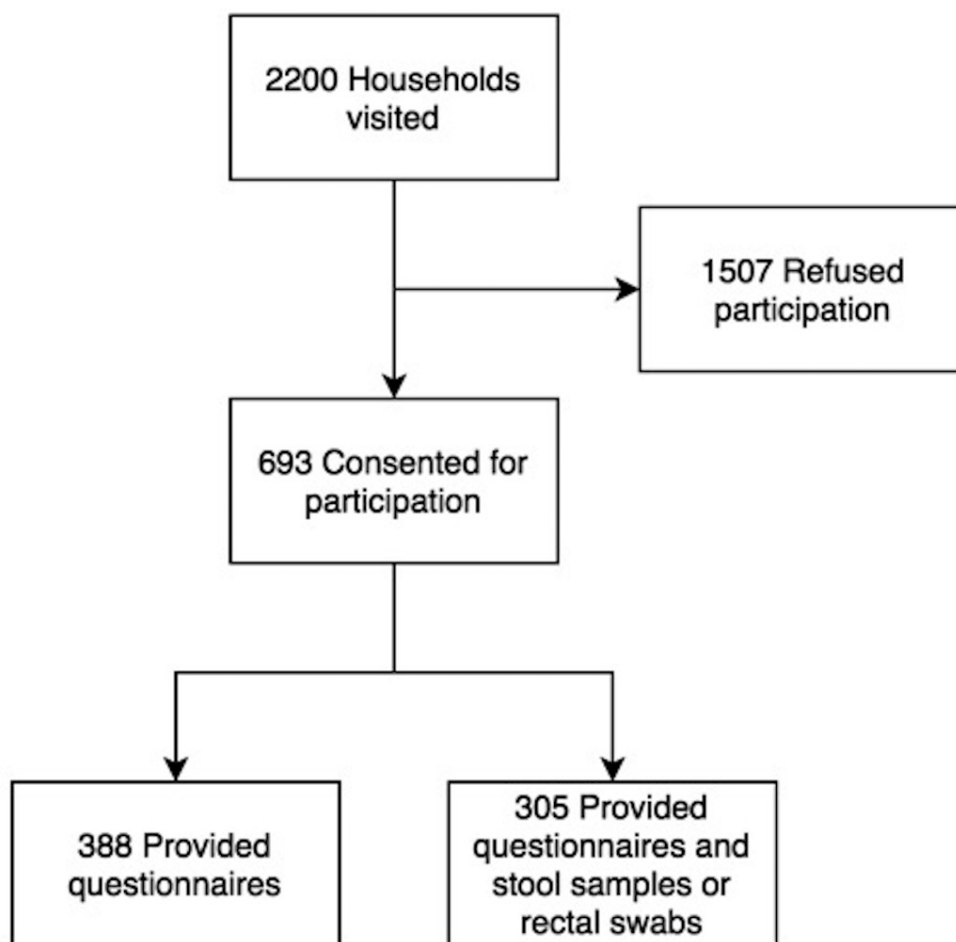

Figure S1. Participant recruitment flowchart

90x87mm (300 x 300 DPI)

Table S1. Study questionnaire

## Section 1: Background Data

**1. Demographic Data**

## 1.1 Age

## 1.2 Gender - Male or Female

## 2. Race - Chinese or Malay or Indian or Others

**3. Educational Background**

2.1 Highest Education Level Attained- Primary Education or Secondary Education or Tertiary Education or Graduate Education or No formal education

4. Have you ever studied a healthcare-related course? (Medicine, Traditional Chinese Medicine, Therapy, Nursing) - Yes or No

## 3 Occupation and Financial Status

## 5. Occupation:

## 4 Accommodation

4.1 Housing type- Public housing (1-Room or 2-Room or 3-Room or 4-Room or 5-Room or Executive Apartment) or Landed property

4.2 How many occupants are there living in your house? (including you) Number of Occupants:

4.3.1 How many people in the household are in the following age group? Less than 12 years old:

4.3.2 How many people in the household are in the following age group? More than 65 years old:

6. Do you currently have any dogs or cats at home? - Yes or No

## 5 Travel history

1  
2  
3 5.3 Have you travelled to the following places within the past 6 months? – Yes or

4  
5 No

6  
7  
8 5.3.1 If yes, which of the following places have you been to? (You may select more  
9  
10 than 1 option) - Southeast Asia (Malaysia, Thailand, Indonesia, Vietnam,  
11  
12 Cambodia etc) and/ or South Asia (India, Bangladesh, Sri Lanka) and/ or East  
13  
14 Asia (China, Korea, Japan) and/ or Europe and/ or South America and/ or  
15  
16 North America and/ or Middle East or Others:

17  
18  
19 5.4 Have you lived anywhere else for more than 1 year? – Yes or No

20  
21  
22 6 If yes, did you live in the following areas? (You may select more than 1 option) -  
23  
24 Southeast Asia (Malaysia, Thailand, Indonesia, Vietnam, Cambodia etc) and/ or  
25  
26 South Asia (India, Bangladesh, Sri Lanka) and/ or East Asia (China, Korea,  
27  
28 Japan) and/ or Europe and/ or South America and/ or North America and/ or  
29  
30 Middle East or Others:

31  
32  
33 7 Medical History

34  
35 6.1 Do you have any of the following? (You can choose more than one of the  
36  
37 following) - Diabetes Mellitus and/ or Medications (Chemotherapy, Steroids,  
38  
39 Immunosuppressants etc) and/ or Other medical conditions or None of the above

40  
41  
42 6.2 When was your last hospitalisation? - Never been hospitalised before or  
43  
44 Hospitalised before

45  
46  
47 6.2.1 If yes, was this hospitalisation within the past 1 year? – Yes or No

48  
49 6.2.2 How long was your stay? Duration:

50  
51  
52 6.3 Have you used antibiotics before? - Have never used antibiotics before or Used  
53  
54 antibiotics before

55  
56 6.3.1 If yes, when was the last time you started on antibiotics? - Within the last 6  
57  
58  
59  
60

months or More than 6 months ago

## Section 2: Assessment of Antibiotic Practices

### 1. Assessing Health-Seeking and Antibiotic-Seeking Behaviours

#### Scenario 1: Cough and Runny Nose

1.1.1 Would you go to the doctor for a cough and runny nose that lasted less than 1 week? – Yes or No or I am not sure

1.1.2 In the above scenario, did you expect the doctor to prescribe antibiotics to help with the recovery? – Yes or No or I am not sure

1.1.3 If the doctor you were seeing does not prescribe you antibiotics for the symptoms above, would you seek another doctor's opinion or firmly request the doctor for an antibiotic prescription? – Yes or No or I am not sure

#### Scenario 2: Diarrhoea and Vomiting

1.2.1 Would you go to the doctor for diarrhoea, vomiting and stomach pain that lasted less than a week? – Yes or No or I am not sure

1.2.2 In the above scenario, did you expect the doctor to prescribe antibiotics to help with the recovery? – Yes or No or I am not sure

1.2.3 If the doctor you were seeing does not prescribe you antibiotics for the symptoms above, would you seek another doctor's opinion or firmly request the doctor for an antibiotic prescription? – Yes or No or I am not sure

### 2. Assessing Practices of Disposal and Storage of Antibiotics

2.1 What do you usually do with leftover antibiotics? - Usually do not have leftovers

1  
2  
3 or Keep it for future use or Pour it down a sink or toilet bowl or Disposal in the  
4 rubbish bin or Others:  
5  
6  
7

8  
9 **3. Assessing Alternative Antibiotic Practices**

10  
11 3.1 Have you ever shared antibiotics with someone else? – Yes or No

12  
13  
14 3.2 Have you ever taken leftover antibiotics from a previous course of illness? – Yes  
15 or No  
16  
17  
18  
19

20  
21  
22 **Section 3: Attitude Assessment**

23  
24  
25 **1. Attitudes Towards Healthcare Provider Prescription**

26  
27 1.1 Sometimes my doctor prioritises what is beneficial for him over my medical  
28 needs. – Strongly agree or Agree or Neutral or Disagree or Strongly Disagree  
29

30  
31 1.2 My doctor's medical skills are not as good as they should be. – Strongly agree or  
32 Agree or Neutral or Disagree or Strongly Disagree  
33  
34

35  
36 1.3 My doctor is always honest when telling me about all the available treatments for  
37 my condition. – Strongly agree or Agree or Neutral or Disagree or Strongly  
38 Disagree  
39  
40  
41  
42

43  
44 1.4 I have no worries about putting my life in my doctor's hands. – Strongly agree or  
45 Agree or Neutral or Disagree or Strongly Disagree  
46  
47

48  
49 **2. Attitudes Towards Potential Educational Interventions**

50  
51 2.1 Which of the following sources of medical information do you trust most? -

52  
53 Healthcare Professionals' Advice (Doctors, nurses, clinical assistants, therapists)  
54 or Family and Friends or Online Medical Sources or Television Programmes and  
55 Advertisements or Radio Programmes and Advertisements  
56  
57  
58  
59  
60

## Section 4: Knowledge Assessment

## 1. Knowledge on Function of Antibiotics

1.1 Antibiotics are medicines that can treat viral infections. – True or False or I am not sure

1.2 Antibiotics are medicines that can treat bacterial infections. – True or False or I am not sure

1.3 Antibiotics are medicines that can treat fungal infections. – True or False or I am not sure

## 2. Knowledge on Agents of Infection

2.1 Which of the following most commonly causes running nose and cough? – Virues or Bacteria or I am not sure

2.2 Which of the following most commonly causes diarrhoea? – Virues or Bacteria or I am not sure

## 3. Knowledge on Proper Use of Antibiotics

3.1 Antibiotics can be obtained at the pharmacist without any prescription. - True or False or I am not sure

3.2 Antibiotics can be stopped when: - You start to feel better or You finish the entire course or You head back to the doctor and he tells you that you can stop

## 4. Knowledge on Concept of Antibiotic Resistance

4.1 Do you understand what is antibiotic resistance? – Yes or No or I am unsure

4.1.1 If yes, describe what causes antibiotic resistance?

4.2 Which of the following is a consequence of antibiotic resistance? (choose only ONE option) - Antibiotics become more effective at treating infections or Antibiotics become less effective at treating infections or Your body immunity



1  
2  
3 becomes weaker or Your body immunity becomes stronger  
4

5 4.3 Antimicrobial resistance is not present in Singapore yet. – Yes or No or I am  
6

7  
8 unsure  
9  
10  
11  
12  
13  
14  
15  
16  
17  
18  
19  
20  
21  
22  
23  
24  
25  
26  
27  
28  
29  
30  
31  
32  
33  
34  
35  
36  
37  
38  
39  
40  
41  
42  
43  
44  
45  
46  
47  
48  
49  
50  
51  
52  
53  
54  
55  
56  
57  
58  
59  
60

For peer review only

Table S2. Assessment of knowledge

| Questions |                                                                         |                              | N (%)        |
|-----------|-------------------------------------------------------------------------|------------------------------|--------------|
|           |                                                                         |                              | Total N= 693 |
| 2.1.1     | Antibiotics are medicines that can treat viral infections.              | False                        | 149 (21.5%)  |
|           |                                                                         | True                         | 335 (48.3%)  |
|           |                                                                         | Unsure                       | 209 (30.2%)  |
| 2.1.2     | Antibiotics are medicines that can treat bacterial infections.          | True                         | 419 (60.5%)  |
|           |                                                                         | False                        | 50 (7.2%)    |
|           |                                                                         | Unsure                       | 224 (32.3%)  |
| 2.1.3     | Antibiotics are medicines that can treat fungal infections.             | False                        | 157 (22.7%)  |
|           |                                                                         | True                         | 194 (28.0%)  |
|           |                                                                         | Unsure                       | 342 (49.4%)  |
| 2.1.4     | Which of the following most commonly causes running nose and cough.     | Viruses                      | 352 (50.8%)  |
|           |                                                                         | Bacteria                     | 130 (18.8%)  |
|           |                                                                         | Unsure                       | 211 (30.4%)  |
| 2.1.5     | Which of the following most commonly causes diarrhoea?                  | Viruses                      | 98 (14.1%)   |
|           |                                                                         | Bacteria                     | 385 (55.6%)  |
|           |                                                                         | Unsure                       | 210 (30.3%)  |
| 2.1.6     | Antibiotics can be stopped when...                                      | You finish the entire course | 554 (79.9%)  |
|           |                                                                         | When you feel better         | 95 (13.7%)   |
|           |                                                                         | Consult the doctor           | 44 (6.3%)    |
| 2.1.7     | Antibiotics can be obtained at the pharmacist without any prescription. | False                        | 564 (81.4%)  |
|           |                                                                         | True                         | 29 (4.2%)    |
|           |                                                                         | Unsure                       | 100 (14.4%)  |

|                                                                                                                                                          |        |                                                                   |                                                            |             |
|----------------------------------------------------------------------------------------------------------------------------------------------------------|--------|-------------------------------------------------------------------|------------------------------------------------------------|-------------|
| 1<br>2<br>3<br>4<br>5<br>6<br>7<br>8<br>9                                                                                                                | 2.1.8  | What causes antimicrobial resistance?<br>(Open ended)             | Inappropriate use of antibiotics                           | 121 (17.5%) |
|                                                                                                                                                          |        |                                                                   | Wrong or unsure                                            | 572 (82.5%) |
| 10<br>11<br>12<br>13<br>14<br>15<br>16<br>17<br>18<br>19<br>20<br>21<br>22<br>23<br>24<br>25<br>26<br>27<br>28<br>29<br>30<br>31<br>32<br>33<br>34       | 2.1.9  | Which of the following is a consequence of antibiotic resistance? | Antibiotics becoming more effective at treating infections | 280 (40.4%) |
|                                                                                                                                                          |        |                                                                   | Antibiotics becoming less effective at treating infections | 111 (16.0%) |
|                                                                                                                                                          |        |                                                                   | Your body immunity becomes weaker                          | 235 (33.9%) |
|                                                                                                                                                          |        |                                                                   | Your body immunity becomes stronger                        | 67 (9.7%)   |
| 35<br>36<br>37<br>38<br>39<br>40<br>41<br>42<br>43<br>44<br>45<br>46<br>47<br>48<br>49<br>50<br>51<br>52<br>53<br>54<br>55<br>56<br>57<br>58<br>59<br>60 | 2.1.10 | Antibiotic resistance is not present in Singapore yet.            | False                                                      | 255 (36.8%) |
|                                                                                                                                                          |        |                                                                   | True                                                       | 77 (11.1%)  |
|                                                                                                                                                          |        |                                                                   | Unsure                                                     | 361 (52.1%) |

Table S3. Assessment of attitude toward primary care

| Questions |                                                                                                |                                  | N (%)      |
|-----------|------------------------------------------------------------------------------------------------|----------------------------------|------------|
|           |                                                                                                |                                  | N= 693     |
| 2.2.1     | Sometimes my doctor prioritises what is beneficial for him over my medical needs               | Strongly agree                   | 14 (2.0)   |
|           |                                                                                                | Agree                            | 109 (15.7) |
|           |                                                                                                | Neutral                          | 145 (20.9) |
|           |                                                                                                | Disagree                         | 335 (48.3) |
|           |                                                                                                | Strongly disagree                | 90 (13.0)  |
| 2.2.2     | My doctor's medical skills are not as good as they should be                                   | Strongly agree                   | 10 (1.4)   |
|           |                                                                                                | Agree                            | 83 (12.0)  |
|           |                                                                                                | Neutral                          | 150 (21.6) |
|           |                                                                                                | Disagree                         | 373 (53.8) |
|           |                                                                                                | Strongly disagree                | 77 (11.1)  |
| 2.2.3     | My doctor is always honest when telling me about all the available treatments for my condition | Strongly agree                   | 100 (14.4) |
|           |                                                                                                | Agree                            | 427 (61.6) |
|           |                                                                                                | Neutral                          | 115 (16.6) |
|           |                                                                                                | Disagree                         | 45 (6.5)   |
|           |                                                                                                | Strongly disagree                | 6 (0.9)    |
| 2.2.4     | I have no worries about putting my life in my doctor's hands                                   | Strongly agree                   | 110 (15.9) |
|           |                                                                                                | Agree                            | 363 (52.4) |
|           |                                                                                                | Neutral                          | 135 (19.5) |
|           |                                                                                                | Disagree                         | 74 (10.7)  |
|           |                                                                                                | Strongly disagree                | 11 (1.6)   |
| 2.2.5     | Which of the following sources of medical information do you trust most?                       | Healthcare professional's advice | 627 (90.6) |
|           |                                                                                                | Family and friends               | 36 (5.2)   |
|           |                                                                                                | Online medical sources           | 24 (3.5)   |

|  |  |                                          |         |
|--|--|------------------------------------------|---------|
|  |  | Television programmes and advertisements | 4 (0.6) |
|  |  | Radio programmes and advertisements      | 1 (0.1) |

For peer review only

Table S4. Assessment of practices

| Questions |                                                                                                                                                                                                                                            |                         | N (%)        |
|-----------|--------------------------------------------------------------------------------------------------------------------------------------------------------------------------------------------------------------------------------------------|-------------------------|--------------|
|           |                                                                                                                                                                                                                                            |                         | Total N= 693 |
| 2.3.1.1   | Would you go to the doctor for a cough and runny nose that lasted less than 1 week                                                                                                                                                         | Yes                     | 294 (42.4)   |
|           |                                                                                                                                                                                                                                            | No                      | 377 (54.4)   |
|           |                                                                                                                                                                                                                                            | Unsure                  | 22 (3.2)     |
| 2.3.1.2   | Would you go to the doctor for diarrhoea, vomiting and stomach pain that lasted less than 1 week?                                                                                                                                          | Yes                     | 414 (59.7)   |
|           |                                                                                                                                                                                                                                            | No                      | 262 (37.8)   |
|           |                                                                                                                                                                                                                                            | Unsure                  | 17 (2.5)     |
| 2.3.2.1   | Would you expect the doctor to prescribe antibiotics for cough and runny nose that lasted less than 1 week to help with the recovery?                                                                                                      | Yes                     | 136 (19.6)   |
|           |                                                                                                                                                                                                                                            | No                      | 508 (73.3)   |
|           |                                                                                                                                                                                                                                            | Unsure                  | 49 (7.1)     |
| 2.3.2.2   | Would you expect the doctor to prescribe antibiotics for diarrhoea, vomiting and stomach pain that lasted less than 1 week to help with the recovery?                                                                                      | Yes                     | 120 (17.3)   |
|           |                                                                                                                                                                                                                                            | No                      | 501 (72.3)   |
|           |                                                                                                                                                                                                                                            | Unsure                  | 72 (10.4)    |
| 2.3.3.1   | If the doctor you were seeing does not prescribe you antibiotics for cough and runny nose that lasted less than 1 week, would you seek another doctor's opinion or firmly request the doctor for an antibiotic prescription?               | Yes                     | 37 (5.3)     |
|           |                                                                                                                                                                                                                                            | No                      | 619 (89.3)   |
|           |                                                                                                                                                                                                                                            | Unsure                  | 37 (5.3)     |
| 2.3.3.2   | If the doctor you were seeing does not prescribe you antibiotics for diarrhea vomiting and stomach pain that lasted less than 1 week, would you seek another doctor's opinion or firmly request the doctor for an antibiotic prescription? | Yes                     | 40 (5.8)     |
|           |                                                                                                                                                                                                                                            | No                      | 615 (88.7)   |
|           |                                                                                                                                                                                                                                            | Unsure                  | 38 (5.5)     |
| 2.3.4.1   | What do you usually do with left over antibiotics?                                                                                                                                                                                         | No left overs           | 476 (68.7)   |
|           |                                                                                                                                                                                                                                            | Disposal in rubbish bin | 130 (18.8)   |
|           |                                                                                                                                                                                                                                            | Keep for future use     | 60 (8.7)     |

|         |                                                                             |                               |            |
|---------|-----------------------------------------------------------------------------|-------------------------------|------------|
|         |                                                                             | Unsure                        | 19 (2.7)   |
|         |                                                                             | Pour down sink or toilet bowl | 8 (1.2)    |
| 2.3.4.2 | Have you ever shared antibiotics with anyone else?                          | Yes                           | 23 (3.3)   |
|         |                                                                             | No                            | 670 (94.5) |
| 2.3.4.3 | Have you ever taken leftover antibiotics from a previous course of illness? | Yes                           | 38 (5.5)   |
|         |                                                                             | No                            | 655 (9.5)  |

Table S5. Molecular classification of ceftriaxone-resistant *E coli* isolates

|                                           | <i>E coli</i>     |                       |               | p-value |
|-------------------------------------------|-------------------|-----------------------|---------------|---------|
|                                           | N=71 (%)          |                       |               |         |
|                                           | ST131<br>N=11 (%) | Non ST131<br>N=60 (%) |               |         |
| Number of resistant genes (mean $\pm$ sd) |                   | 1.2 $\pm$ 0.4         | 1.9 $\pm$ 0.8 | 0.0012  |
| ESBL genes                                |                   |                       |               |         |
| CTXM                                      | 15                | 4 (36.4)              | 17 (28.3)     | 0.72    |
|                                           | 27                | 7 (63.6)              | 9 (15.0)      |         |
|                                           | 14                | 0 (0.0)               | 10 (16.7)     |         |
|                                           | 55                | 0 (0.0)               | 9 (15.0)      |         |
|                                           | 8                 | 0 (0.0)               | 3 (5.0)       |         |
|                                           | Others            | 0 (0.0)               | 9 (15.0)      |         |
|                                           | None              | 0 (0.0)               | 3 (5.0)       |         |
| SHV                                       | 12                | 0 (0.0)               | 3 (5.0)       | 1.0     |
|                                           | None              | 11 (100.0)            | 57 (95.0)     |         |
| TEM                                       | 206               | 1 (9.1)               | 11 (18.3)     | 0.11    |
|                                           | 198               | 0 (0.0)               | 3 (5.0)       |         |
|                                           | Others            | 0 (0.0)               | 15 (25.0)     |         |

|                      |      |           |           |       |
|----------------------|------|-----------|-----------|-------|
|                      | None | 10 (90.9) | 31 (51.7) |       |
| OXA                  |      | 1 (9.1)   | 3 (5.0)   | 1.0   |
| Quinolone resistance |      | 8 (72.7)  | 21 (35.0) | 0.041 |

\* Non-ST131 sequence types are: 38 (N=8), 1193 (N=5), 10 (N=4), 48 (N=3), other (N=35), none (N=5)

For peer review only



**STROBE 2007 (v4) checklist of items to be included in reports of observational studies in epidemiology\***  
**Checklist for cohort, case-control, and cross-sectional studies (combined)**

| Section/Topic             | Item # | Recommendation                                                                                                                                                                                                                                                                                                                                                                                                                                                         | Reported on page # |
|---------------------------|--------|------------------------------------------------------------------------------------------------------------------------------------------------------------------------------------------------------------------------------------------------------------------------------------------------------------------------------------------------------------------------------------------------------------------------------------------------------------------------|--------------------|
| Title and abstract        | 1      | (a) Indicate the study's design with a commonly used term in the title or the abstract                                                                                                                                                                                                                                                                                                                                                                                 | 2                  |
|                           |        | (b) Provide in the abstract an informative and balanced summary of what was done and what was found                                                                                                                                                                                                                                                                                                                                                                    | 2                  |
| <b>Introduction</b>       |        |                                                                                                                                                                                                                                                                                                                                                                                                                                                                        |                    |
| Background/rationale      | 2      | Explain the scientific background and rationale for the investigation being reported                                                                                                                                                                                                                                                                                                                                                                                   | 4                  |
| Objectives                | 3      | State specific objectives, including any pre-specified hypotheses                                                                                                                                                                                                                                                                                                                                                                                                      | 4                  |
| <b>Methods</b>            |        |                                                                                                                                                                                                                                                                                                                                                                                                                                                                        |                    |
| Study design              | 4      | Present key elements of study design early in the paper                                                                                                                                                                                                                                                                                                                                                                                                                | 4-8                |
| Setting                   | 5      | Describe the setting, locations, and relevant dates, including periods of recruitment, exposure, follow-up, and data collection                                                                                                                                                                                                                                                                                                                                        | 4-5                |
| Participants              | 6      | (a) <i>Cohort study</i> —Give the eligibility criteria, and the sources and methods of selection of participants. Describe methods of follow-up<br><i>Case-control study</i> —Give the eligibility criteria, and the sources and methods of case ascertainment and control selection. Give the rationale for the choice of cases and controls<br><i>Cross-sectional study</i> —Give the eligibility criteria, and the sources and methods of selection of participants | 4-5                |
|                           |        | (b) <i>Cohort study</i> —For matched studies, give matching criteria and number of exposed and unexposed<br><i>Case-control study</i> —For matched studies, give matching criteria and the number of controls per case                                                                                                                                                                                                                                                 | NA                 |
| Variables                 | 7      | Clearly define all outcomes, exposures, predictors, potential confounders, and effect modifiers. Give diagnostic criteria, if applicable                                                                                                                                                                                                                                                                                                                               | 5-7                |
| Data sources/ measurement | 8*     | For each variable of interest, give sources of data and details of methods of assessment (measurement). Describe comparability of assessment methods if there is more than one group                                                                                                                                                                                                                                                                                   | 4-8                |
| Bias                      | 9      | Describe any efforts to address potential sources of bias                                                                                                                                                                                                                                                                                                                                                                                                              | 4-5                |
| Study size                | 10     | Explain how the study size was arrived at                                                                                                                                                                                                                                                                                                                                                                                                                              | 4-5                |
| Quantitative variables    | 11     | Explain how quantitative variables were handled in the analyses. If applicable, describe which groupings were chosen and why                                                                                                                                                                                                                                                                                                                                           | 7-8                |
| Statistical methods       | 12     | (a) Describe all statistical methods, including those used to control for confounding                                                                                                                                                                                                                                                                                                                                                                                  | 7-8                |
|                           |        | (b) Describe any methods used to examine subgroups and interactions                                                                                                                                                                                                                                                                                                                                                                                                    | 7-8                |
|                           |        | (c) Explain how missing data were addressed                                                                                                                                                                                                                                                                                                                                                                                                                            | NA                 |
|                           |        | (d) <i>Cohort study</i> —If applicable, explain how loss to follow-up was addressed<br><i>Case-control study</i> —If applicable, explain how matching of cases and controls was addressed                                                                                                                                                                                                                                                                              | 4-5                |

|                          |     |                                                                                                                                                                                                              |                        |
|--------------------------|-----|--------------------------------------------------------------------------------------------------------------------------------------------------------------------------------------------------------------|------------------------|
|                          |     | <i>Cross-sectional study</i> —If applicable, describe analytical methods taking account of sampling strategy                                                                                                 |                        |
|                          |     | (e) Describe any sensitivity analyses                                                                                                                                                                        | NA                     |
| <b>Results</b>           |     |                                                                                                                                                                                                              |                        |
| Participants             | 13* | (a) Report numbers of individuals at each stage of study—eg numbers potentially eligible, examined for eligibility, confirmed eligible, included in the study, completing follow-up, and analysed            | 8                      |
|                          |     | (b) Give reasons for non-participation at each stage                                                                                                                                                         | 8                      |
|                          |     | (c) Consider use of a flow diagram                                                                                                                                                                           | Supplementary material |
| Descriptive data         | 14* | (a) Give characteristics of study participants (eg demographic, clinical, social) and information on exposures and potential confounders                                                                     | 8-9                    |
|                          |     | (b) Indicate number of participants with missing data for each variable of interest                                                                                                                          | NA                     |
|                          |     | (c) <i>Cohort study</i> —Summarise follow-up time (eg, average and total amount)                                                                                                                             | NA                     |
| Outcome data             | 15* | <i>Cohort study</i> —Report numbers of outcome events or summary measures over time                                                                                                                          | NA                     |
|                          |     | <i>Case-control study</i> —Report numbers in each exposure category, or summary measures of exposure                                                                                                         | NA                     |
|                          |     | <i>Cross-sectional study</i> —Report numbers of outcome events or summary measures                                                                                                                           | 9-15                   |
| Main results             | 16  | (a) Give unadjusted estimates and, if applicable, confounder-adjusted estimates and their precision (eg, 95% confidence interval). Make clear which confounders were adjusted for and why they were included | 9-15                   |
|                          |     | (b) Report category boundaries when continuous variables were categorized                                                                                                                                    | 9-15                   |
|                          |     | (c) If relevant, consider translating estimates of relative risk into absolute risk for a meaningful time period                                                                                             | NA                     |
| Other analyses           | 17  | Report other analyses done—eg analyses of subgroups and interactions, and sensitivity analyses                                                                                                               | 9-15                   |
| <b>Discussion</b>        |     |                                                                                                                                                                                                              |                        |
| Key results              | 18  | Summarise key results with reference to study objectives                                                                                                                                                     | 15-17                  |
| Limitations              | 19  | Discuss limitations of the study, taking into account sources of potential bias or imprecision. Discuss both direction and magnitude of any potential bias                                                   | 17                     |
| Interpretation           | 20  | Give a cautious overall interpretation of results considering objectives, limitations, multiplicity of analyses, results from similar studies, and other relevant evidence                                   | 15-17                  |
| Generalisability         | 21  | Discuss the generalisability (external validity) of the study results                                                                                                                                        | 15-17                  |
| <b>Other information</b> |     |                                                                                                                                                                                                              |                        |
| Funding                  | 22  | Give the source of funding and the role of the funders for the present study and, if applicable, for the original study on which the present article is based                                                | 19-20                  |

\*Give information separately for cases and controls in case-control studies and, if applicable, for exposed and unexposed groups in cohort and cross-sectional studies.

1  
2  
3  
4 **Note:** An Explanation and Elaboration article discusses each checklist item and gives methodological background and published examples of transparent reporting. The STROBE  
5 checklist is best used in conjunction with this article (freely available on the Web sites of PLoS Medicine at <http://www.plosmedicine.org/>, Annals of Internal Medicine at  
6 <http://www.annals.org/>, and Epidemiology at <http://www.epidem.com/>). Information on the STROBE Initiative is available at [www.strobe-statement.org](http://www.strobe-statement.org).  
7  
8  
9  
10  
11  
12  
13  
14  
15  
16  
17  
18  
19  
20  
21  
22  
23  
24  
25  
26  
27  
28  
29  
30  
31  
32  
33  
34  
35  
36  
37  
38  
39  
40  
41  
42  
43  
44  
45  
46  
47

For peer review only
